# Supplementary material for: Synthesis, molecular modelling and QSAR study of new N-phenylacetamide-2-oxoindole benzensulfonamide conjugates as carbonic anhydrase inhibitors with antiproliferative activity
Source: PubMed Central journal article supplement — J Enzyme Inhib Med Chem. 2022 Feb 15;37(1):701–17. doi: 10.1080/14756366.2022.2036137 (PMC8863381; doi:10.1080/14756366.2022.2036137), 2022-02-15
Supplement: IENZ_A_2036137_SM3459.pdf [file IENZ_A_2036137_SM3459.pdf]

**Synthesis, molecular modeling and QSAR study of new *N*-phenyl acetamide-2-oxindole benzenesulfonamide conjugates as carbonic anhydrase inhibitors with antiproliferative activity**

Mona F. Said<sup>a</sup>, Riham F. George<sup>a,\*</sup>, Andrea Petreni<sup>b</sup>, Claudiu T. Supuran<sup>b,\*\*</sup> Nada M. Mohamed<sup>c</sup>

<sup>a</sup> Pharmaceutical Chemistry Department, Faculty of Pharmacy, Cairo University, Cairo 11562, Egypt.

<sup>b</sup> University of Florence, Department of NEUROFARBA, Section of Pharmaceutical and Nutraceutical Sciences, via Ugo Schiff 6, 50019, Sesto Fiorentino, Florence, Italy.

<sup>c</sup> Department of Pharmaceutical Chemistry, Faculty of Pharmacy, Modern University for Technology and Information MTI, Cairo, Egypt.

**Index:**

|                                                                                                    |    |
|----------------------------------------------------------------------------------------------------|----|
| - Cytotoxicity (Figures S1-S6) .....                                                               | 1  |
| - Carbonic anhydrase inhibition (Figures S7-S9).....                                               | 7  |
| - <i>Molecular docking</i> (Figures S10-S12) .....                                                 | 10 |
| - QSAR study (Figures S13-S16) .....                                                               | 15 |
| - <sup>1</sup> H NMR and <sup>13</sup> C NMR for new synthesized compounds (Figures S17-S47) ..... | 22 |

**Cytotoxicity:**

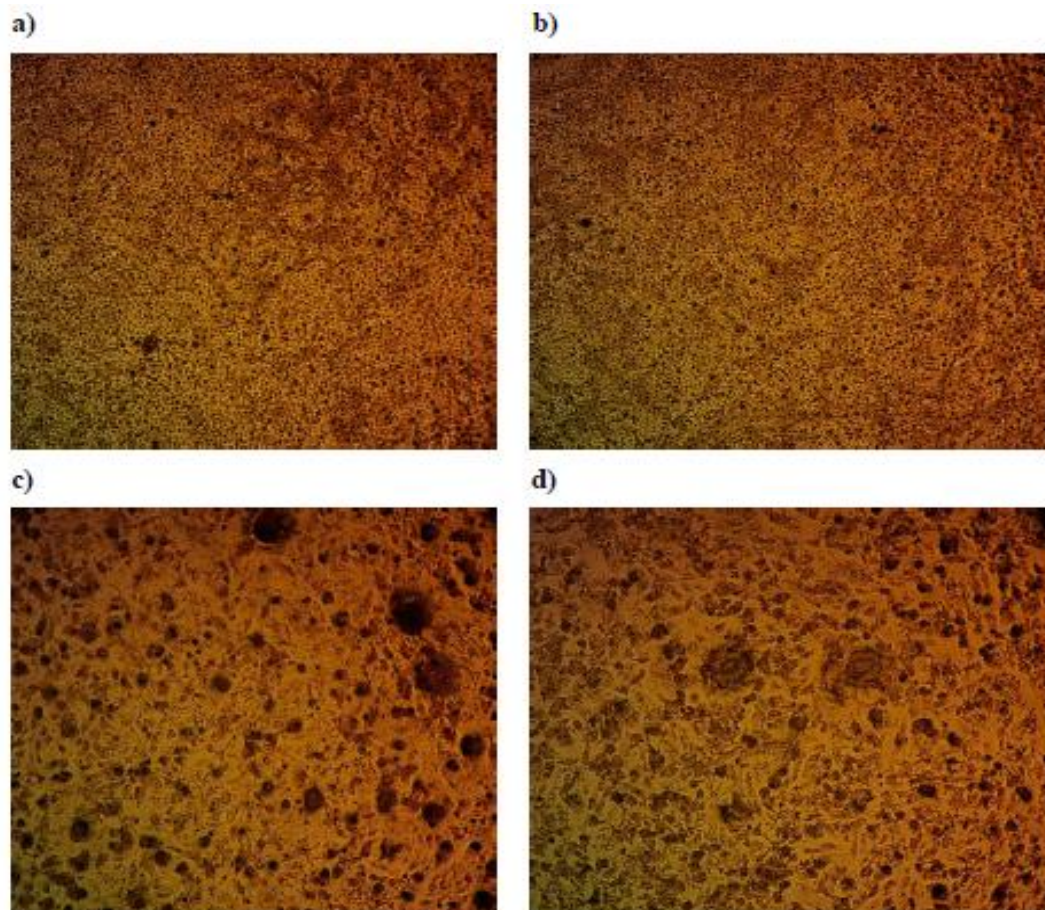

**Figure S1.** Cytotoxic effect of tested compounds **2h**, **3c**, **3d** at concentration 100  $\mu$ M on human skin fibroblast cell line (HSF). a) Control. b) Cytotoxic effect of compound **2h**. c) Cytotoxic effect of compound **3c**. d) Cytotoxic effect of compound **3d**.

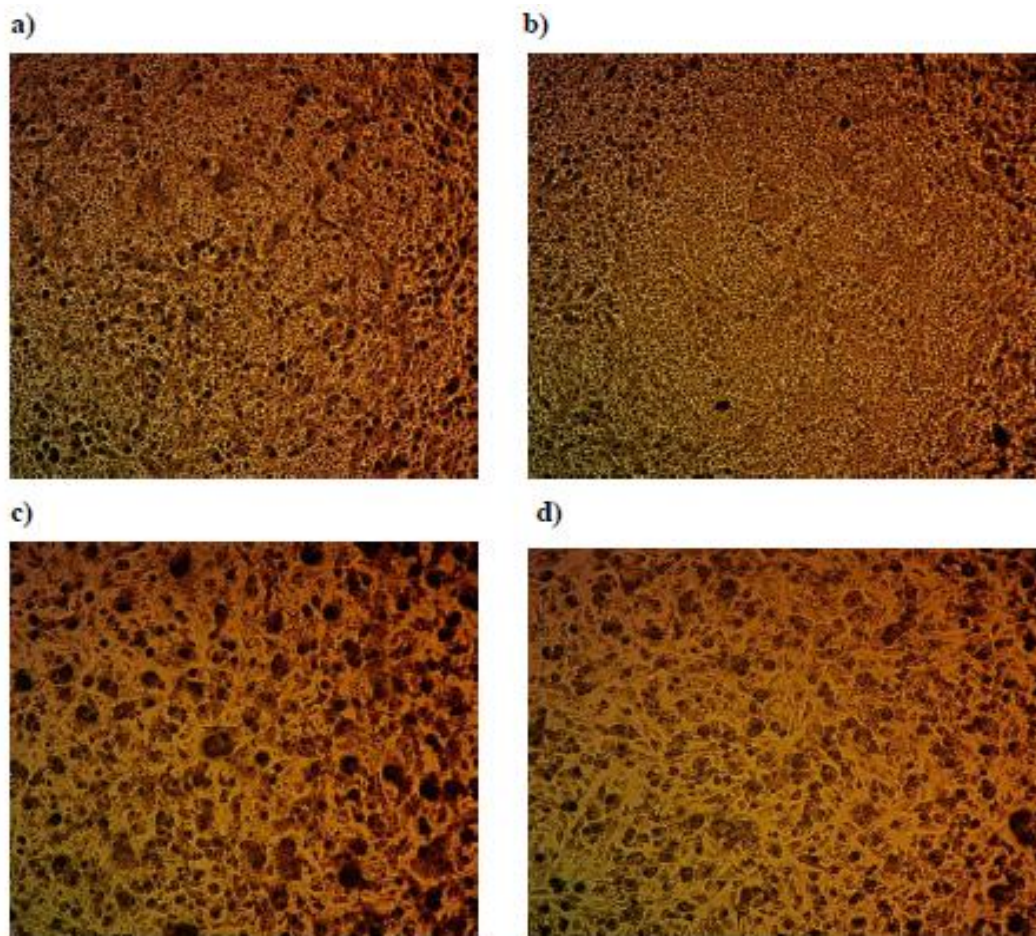

**Figure S2.** Cytotoxic effect of tested compounds **2h**, **3c**, **3d** at concentration 100  $\mu$ M on human breast cancer cell line (MCF-7). a) Control. b) Cytotoxic effect of compound **2h**. c) Cytotoxic effect of compound **3c**. d) Cytotoxic effect of compound **3d**.

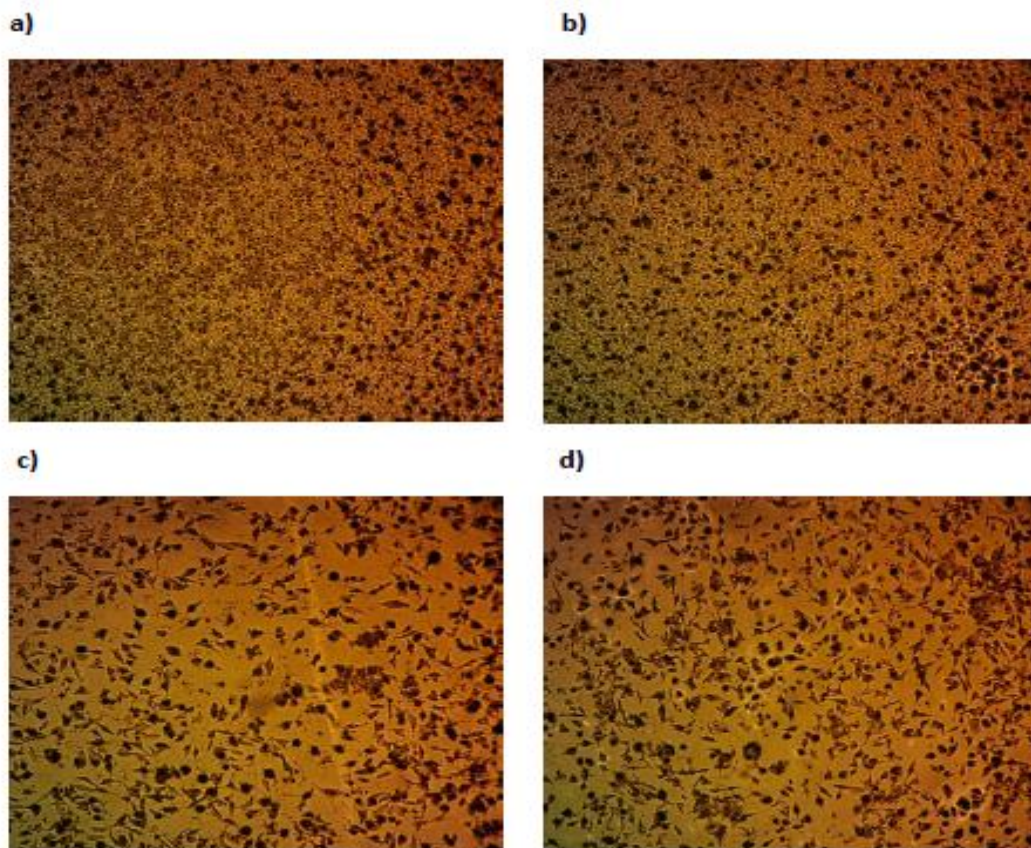

**Figure S3.** Cytotoxic effect of tested compounds **2h**, **3c**, **3d** at concentration 100  $\mu$ M on human lung adenocarcinoma (A549). a) Control. b) Cytotoxic effect of compound **2h**. c) Cytotoxic effect of compound **3c**. d) Cytotoxic effect of compound **3d**.

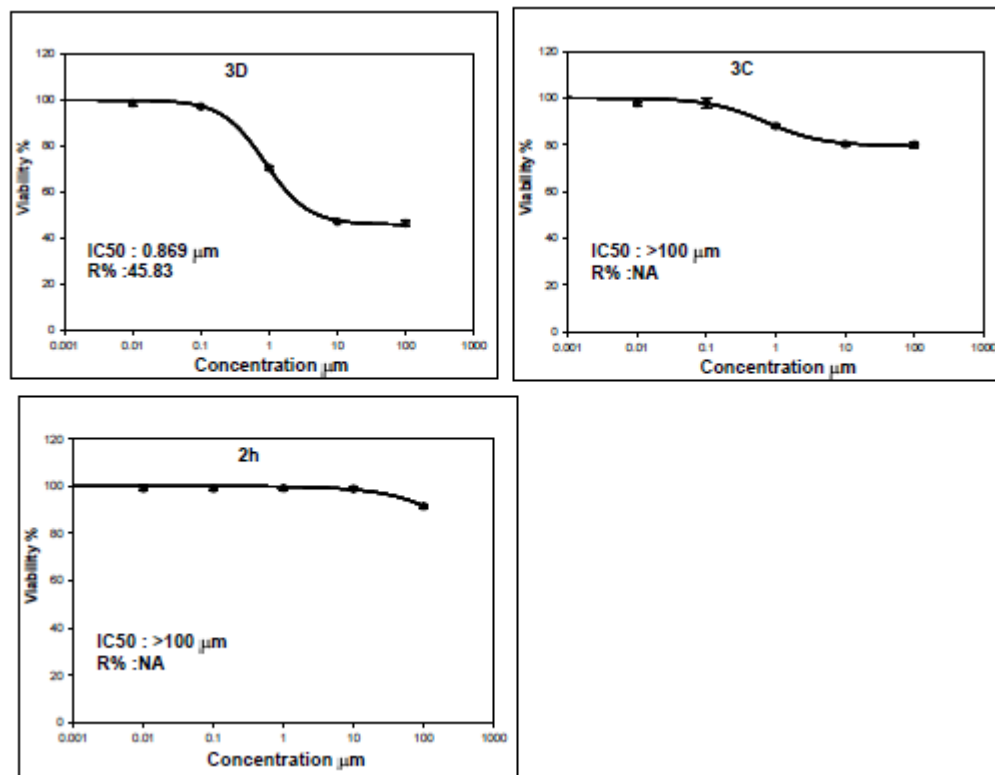

**Figure S4.** IC<sub>50</sub> curves for compounds 2h, 3c and 3d against MCF-7 breast cancer cell line.

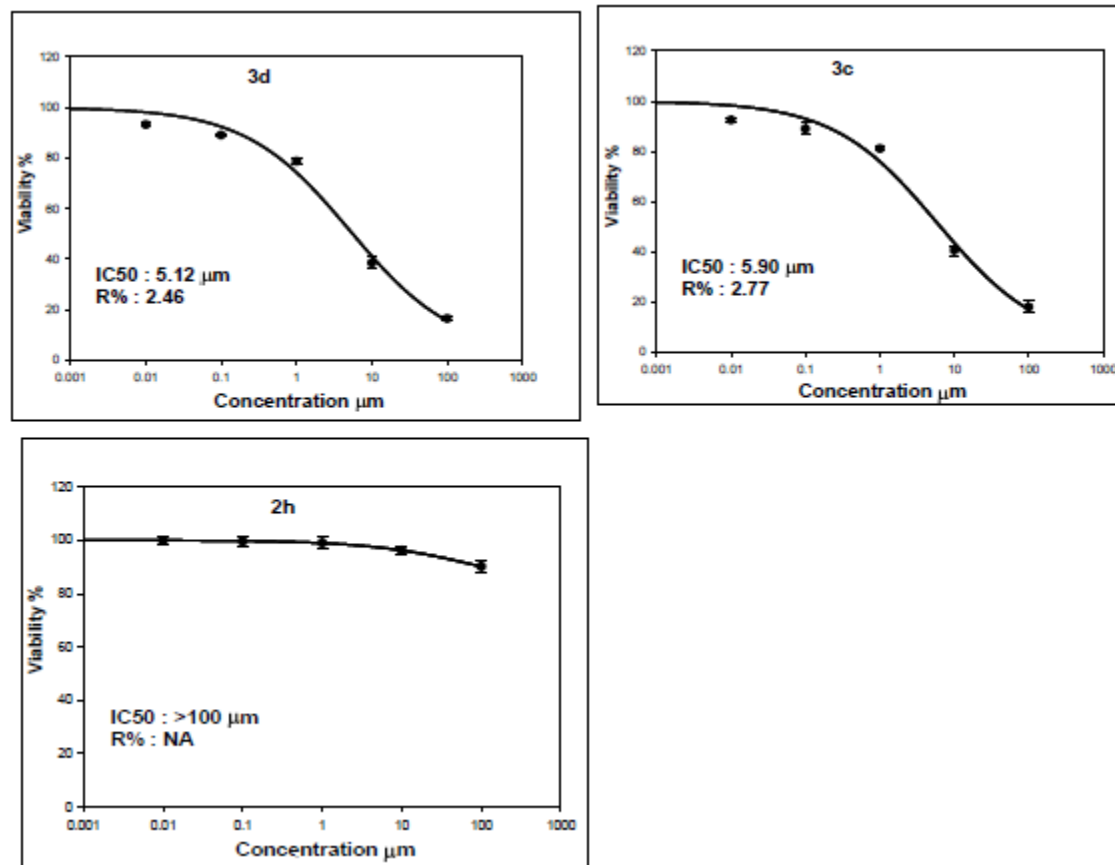

**Figure S5.** IC<sub>50</sub> curves for compounds **2h**, **3c** and **3d** against A549 lung cancer cell line.

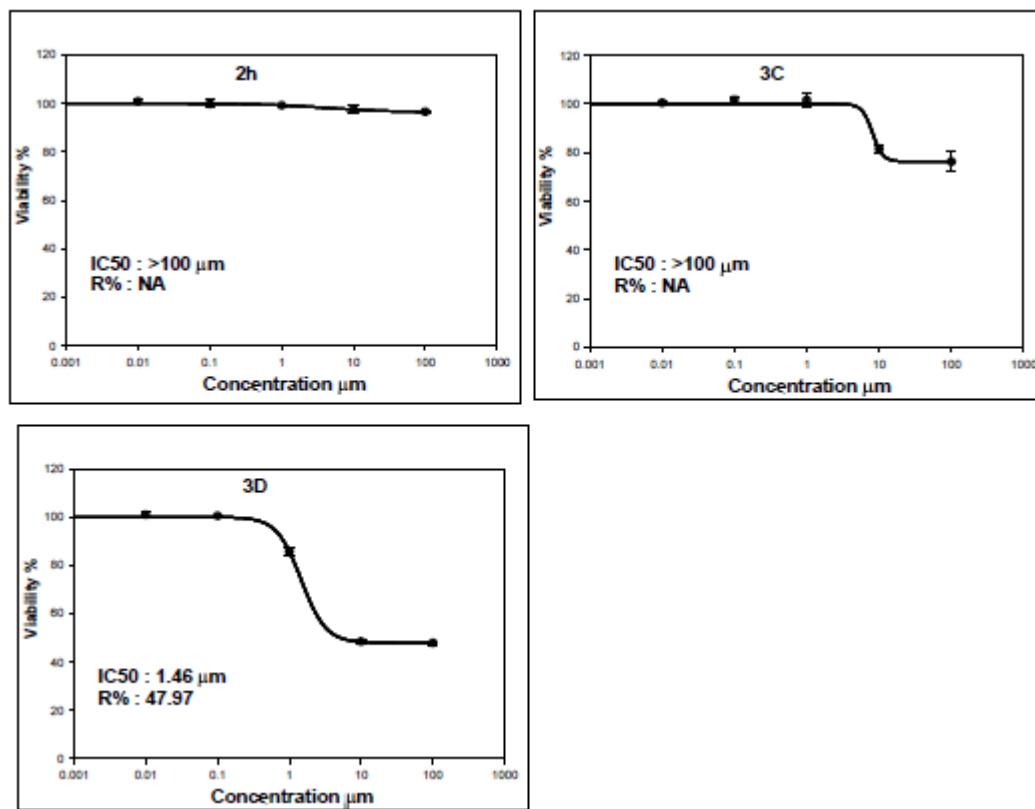

**Figure S6.** IC<sub>50</sub> curves for compounds **2h**, **3c** and **3d** against HSF human skin fibroblasts.



### Compound 2h

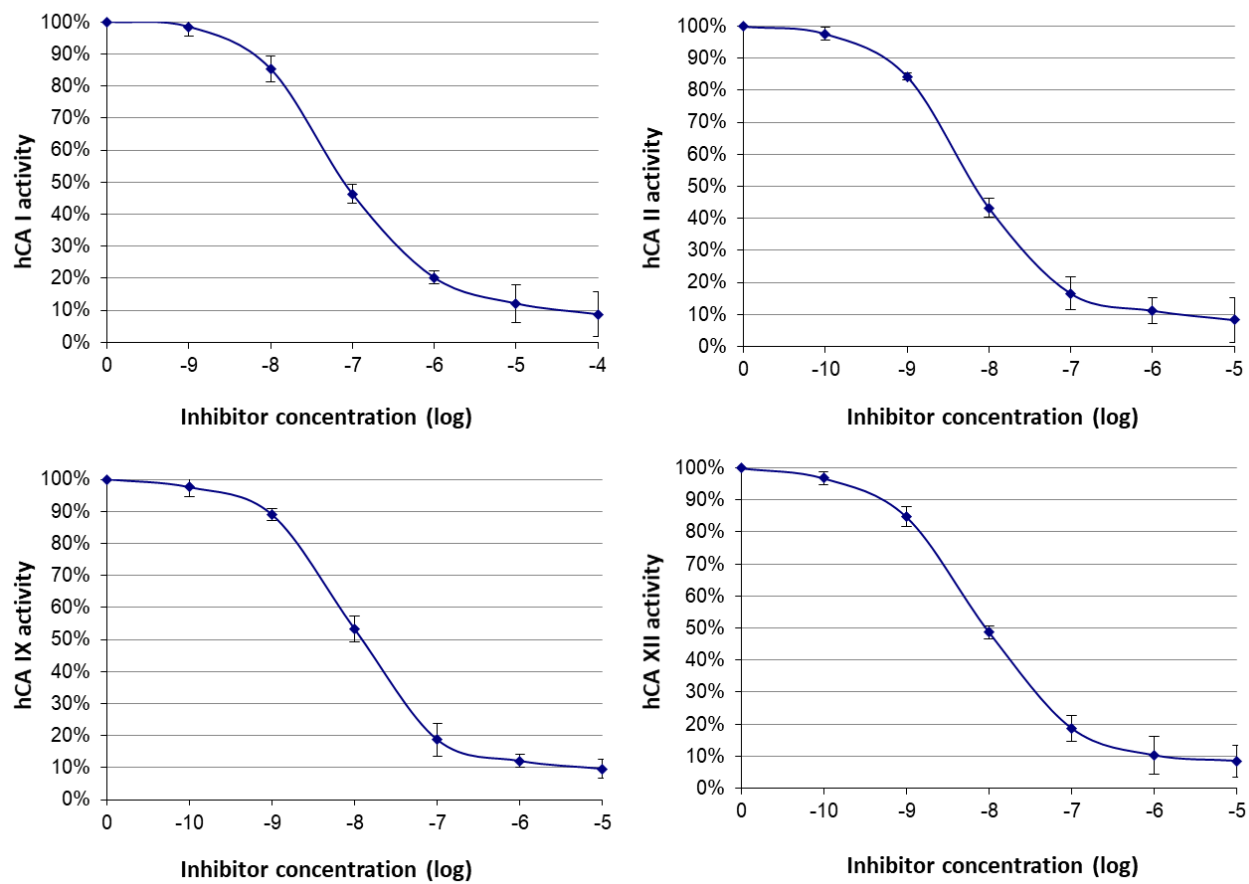

**Figure S7.** Effect of compound **2h** on the activity of CA I, CA II, CA IX and CA XII isoforms.

### Compound 3c

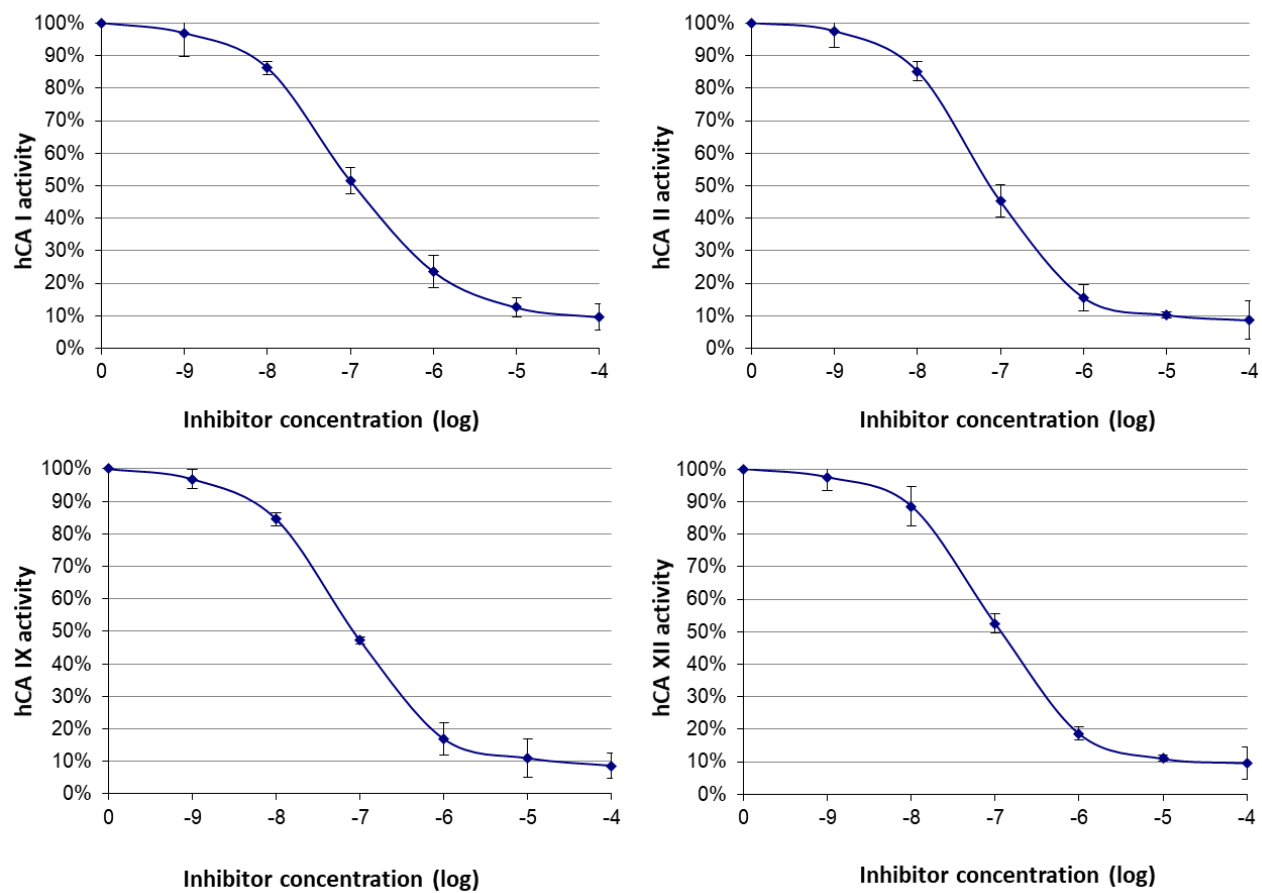

**Figure S8.** Effect of compound 3c on the activity of CA I, CA II, CA IX and CA XII isoforms.

### Compound 3d

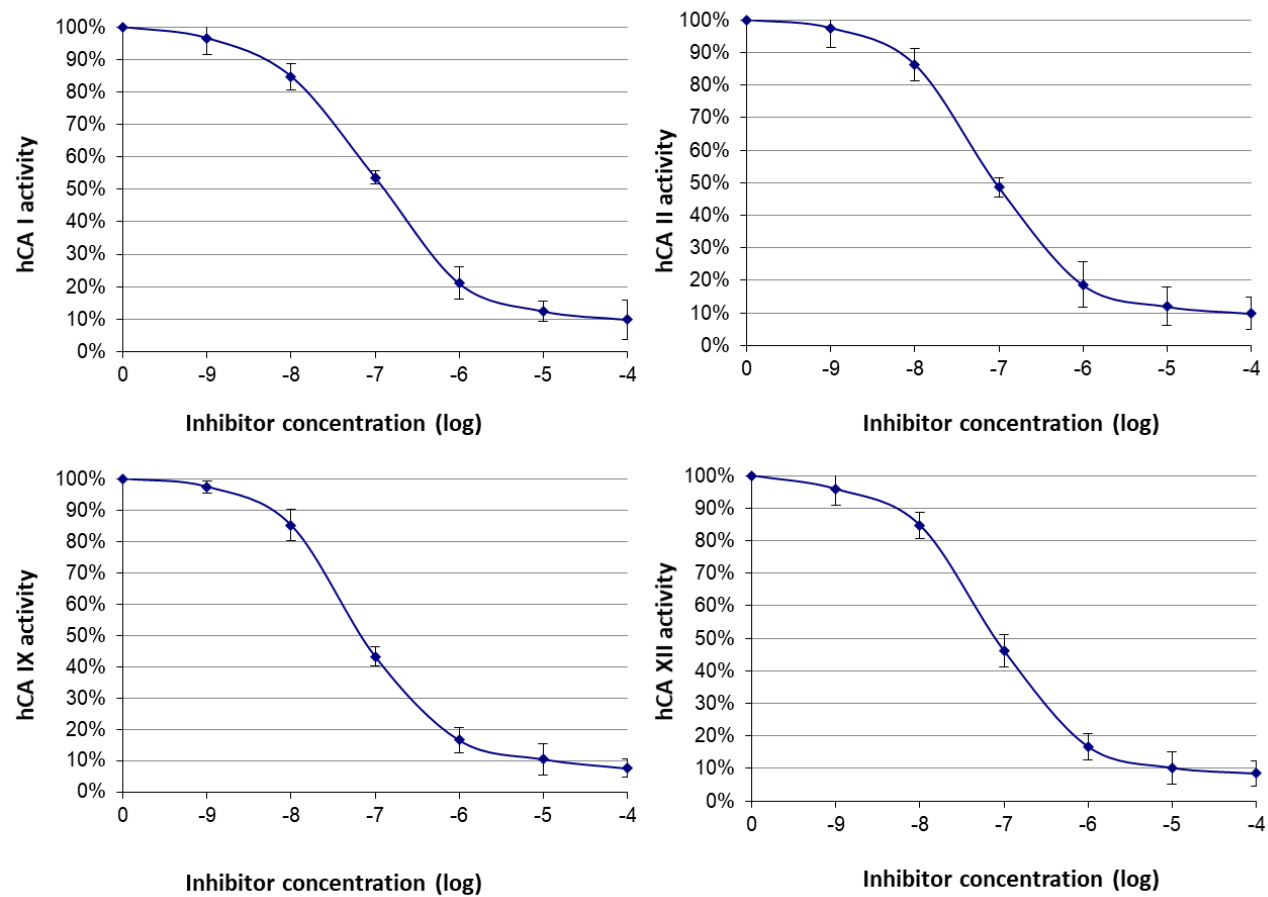

**Figure S9.** Effect of compound **3d** on the activity of CA I, CA II, CA IX and CA XII isoforms.

## Molecular docking study

a)

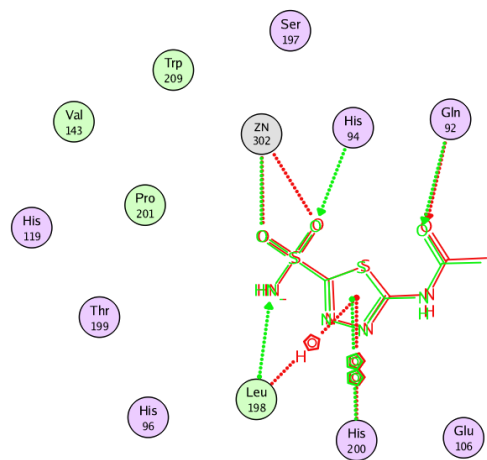

b)

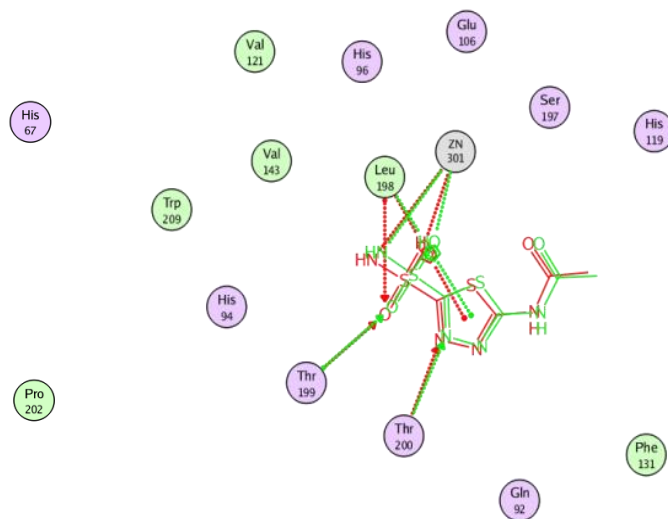

c)

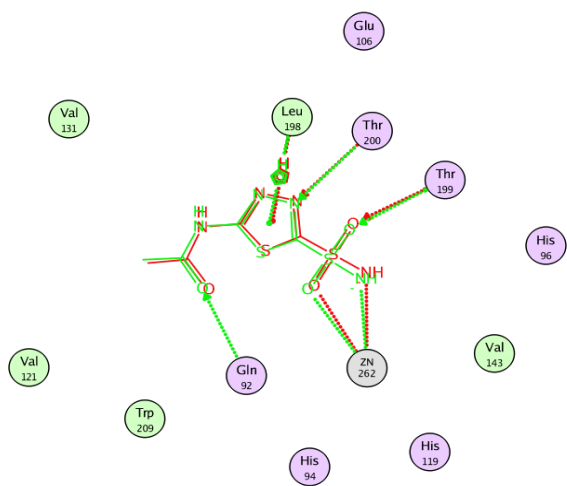

d)

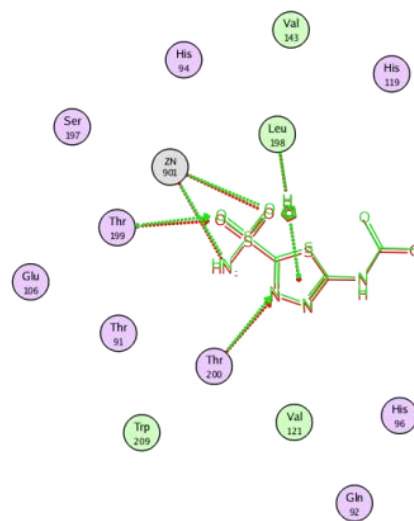

**Figure S10.** The 2D presentations of molecular docking method validation using PDB ID: 3W6H (a), 3HS4 (b), 3IAI (c) and 1JD0 (d) for CA I, II, IX and XII, respectively.

a)

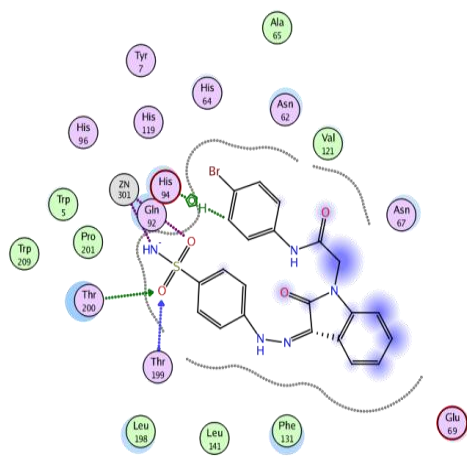

b)

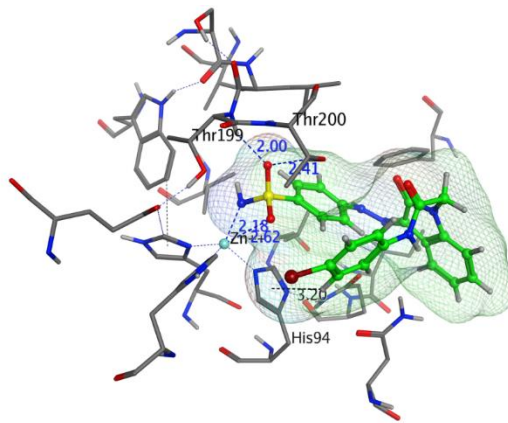

c)

d)

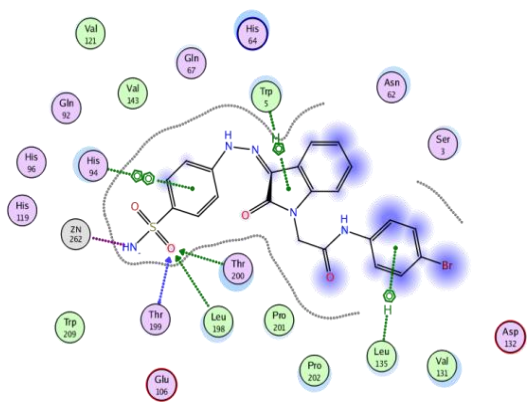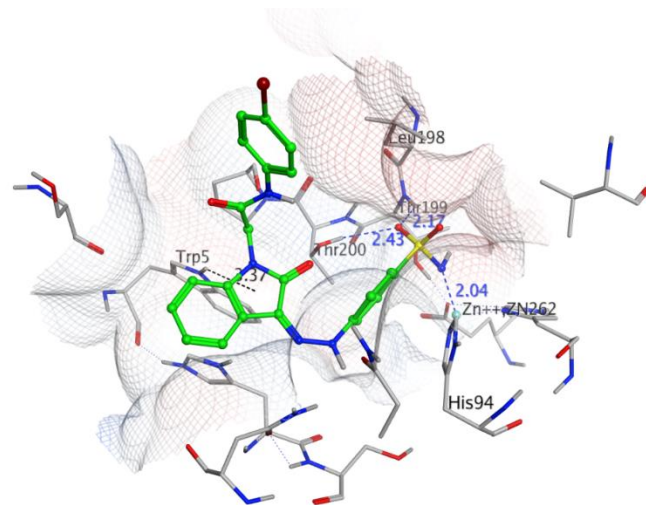

e)

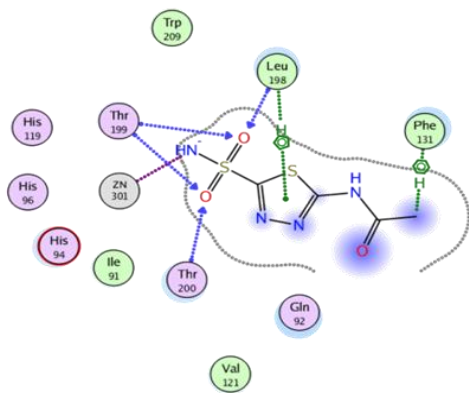

f)

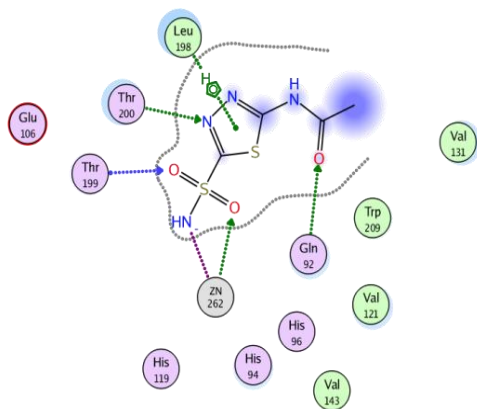

**Figure S11.** The 2D and 3D interactions of **3c** molecular docking study using PDB ID 3HS4 (a, b) and 3IAI (c,d) for *hCA* isoforms II and IX, respectively showing **3c** in green ball and stick model with the formed H-bonds and arene-H were shown in blue and black dotted lines, respectively with their distance in Å highlighting the interaction site.. The 2D interactions of **AAZ** using *hCA* II 3HS4 (e) and *hCA* IX PDB ID 3IAI (f).

a)

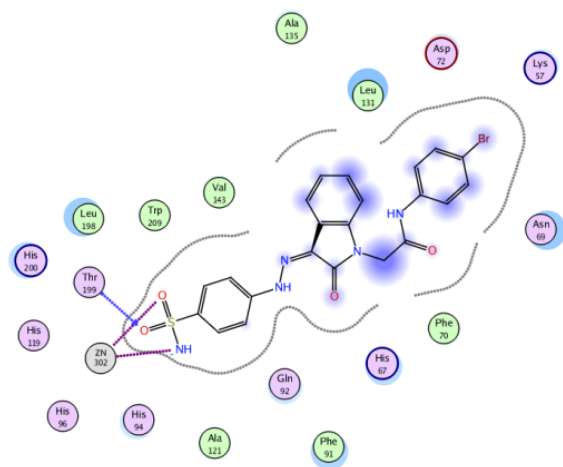

b)

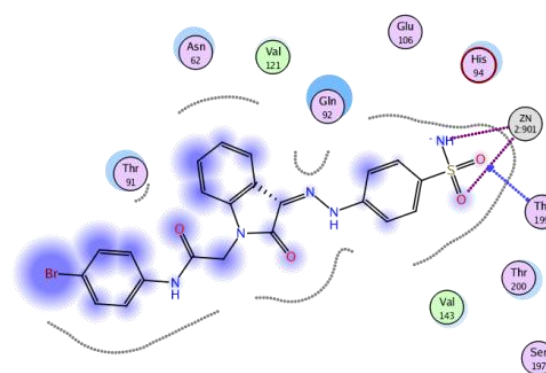

**Figure S12.** The 2D interactions of **3c** molecular docking data using PDB ID3W6H (a) and PDB ID 1JD0 (b) for CA I and CA XII, respectively.



## QSAR study

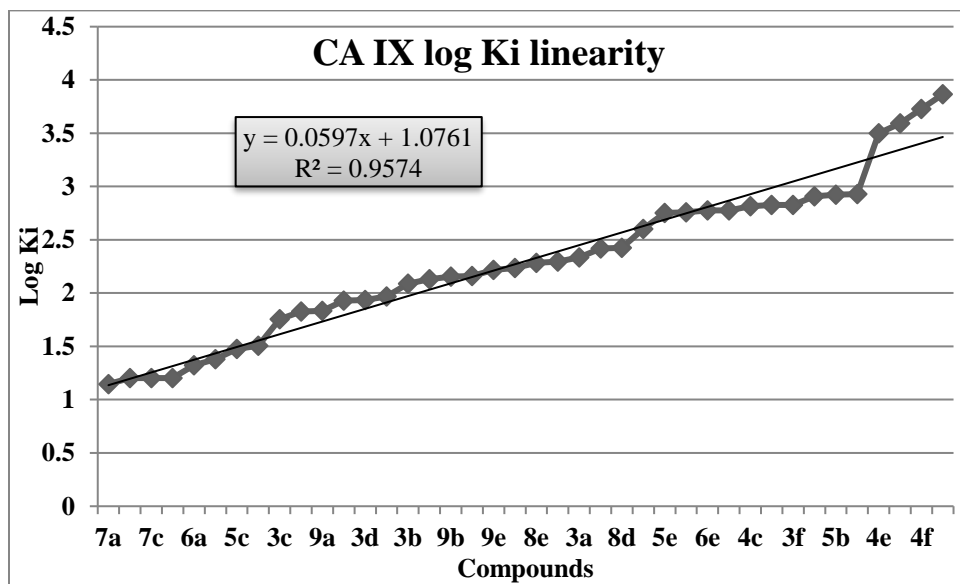

**Figure S13.** Chart presentation of the linearity of the achieved CA IX Ki value in its Logarithmic form.

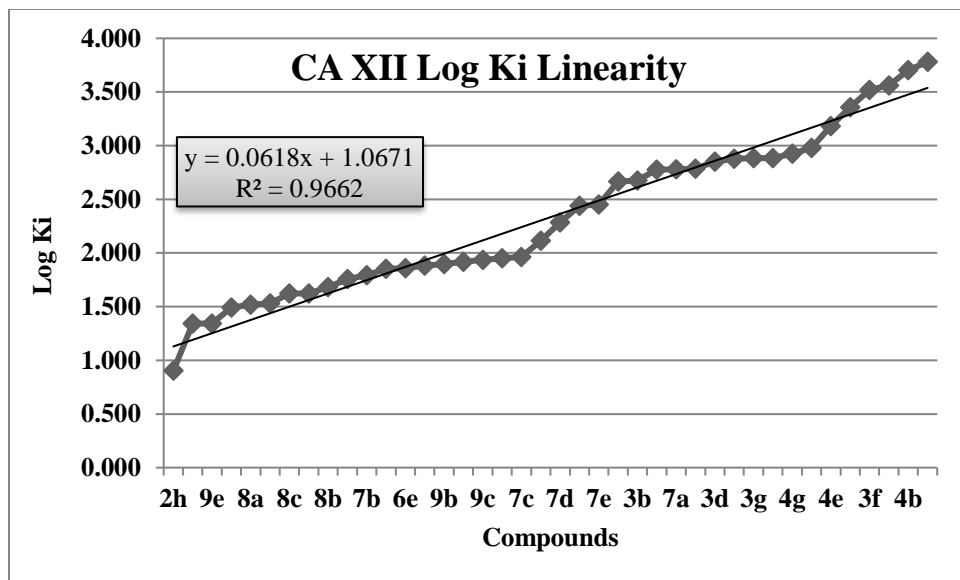

**Figure S14.** Chart presentation of the linearity of the achieved CA XII Ki value in its Logarithmic form.

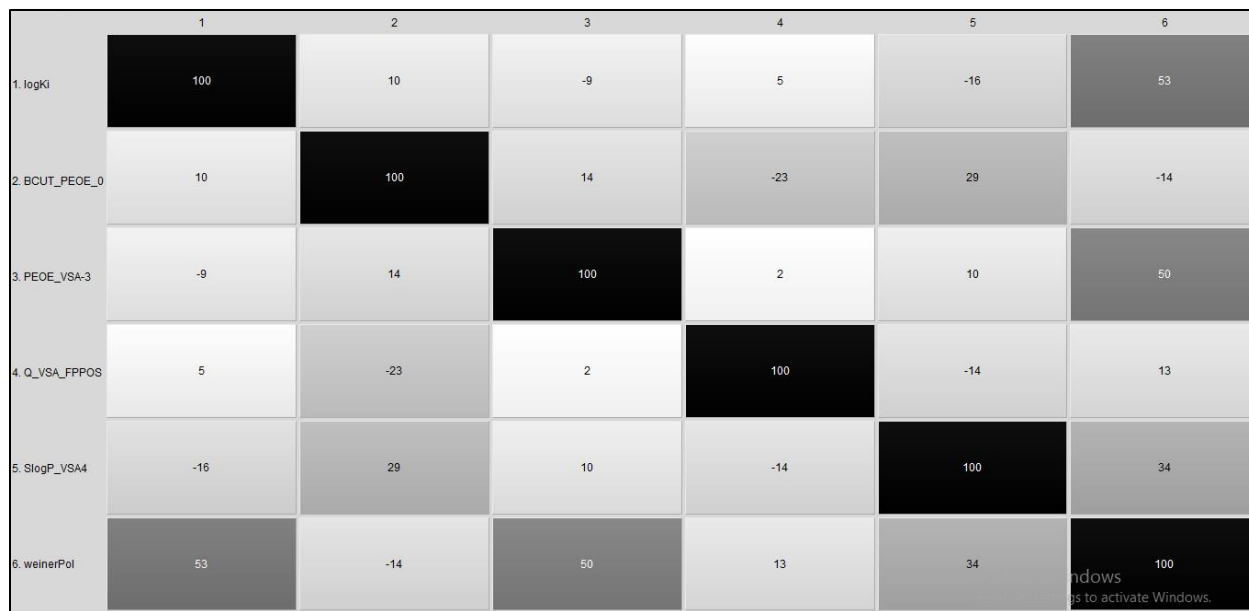

**Figure S15.** The correlation matrix of the selected descriptors for the 2D QSAR model of CA IX inhibitors.

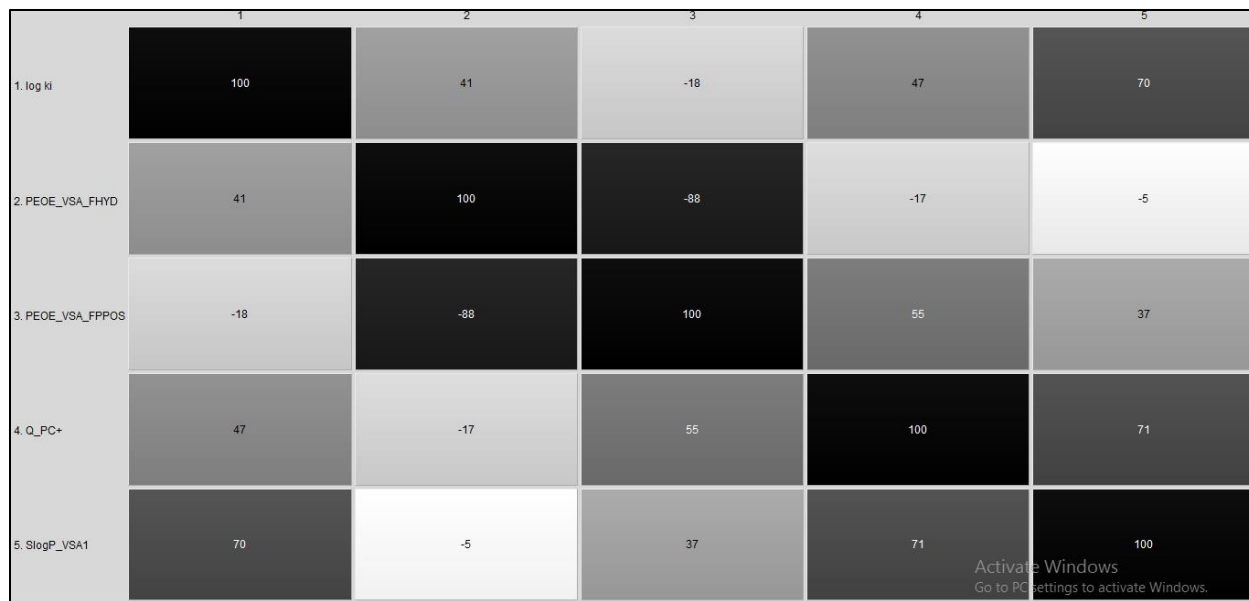

**Figure S16.** The correlation matrix of the selected descriptors for the 2D QSAR model of CA XII inhibitors.

**Table S1.** The calculated 2D descriptors of the training set analogs against *hCA IX* that governed the activity according to equation 1.

| Compound | Training Set      |             |            |             |            |           |
|----------|-------------------|-------------|------------|-------------|------------|-----------|
|          | logK <sub>i</sub> | BCUT_PEOE_0 | PEOE_VSA-3 | Q_VSA_FPPOS | SlogP_VSA4 | weinerPol |
| 7a       | 1.146             | -2.386      | 18.465     | 0.29        | 3.186      | 38        |
| 6d       | 1.204             | -2.385      | 22.34      | 0.2         | 3.186      | 40        |
| 7c       | 1.204             | -2.461      | 18.465     | 0.268       | 3.186      | 44        |
| 6a       | 1.322             | -2.327      | 22.34      | 0.226       | 3.186      | 33        |
| 5c       | 1.477             | -2.461      | 9.044      | 0.193       | 3.186      | 38        |
| 7b       | 1.505             | -2.386      | 18.465     | 0.308       | 3.186      | 42        |
| 3c       | 1.756             | -2.388      | 22.34      | 0.2         | 3.186      | 52        |
| 2h       | 1.826             | -2.389      | 9.044      | 0.256       | 27.048     | 40        |
| 9a       | 1.833             | -2.386      | 18.465     | 0.233       | 30.233     | 55        |
| 3d       | 1.935             | -2.393      | 22.34      | 0.206       | 6.371      | 52        |
| 9c       | 1.968             | -2.386      | 18.465     | 0.224       | 30.233     | 57        |
| 3b       | 2.09              | -2.388      | 22.34      | 0.206       | 3.186      | 52        |
| 5a       | 2.13              | -2.319      | 9.044      | 0.207       | 3.186      | 32        |
| 9b       | 2.155             | -2.386      | 18.465     | 0.231       | 30.233     | 57        |
| 9e       | 2.217             | -2.386      | 18.465     | 0.27        | 30.233     | 59        |
| 8b       | 2.236             | -2.327      | 22.34      | 0.175       | 30.233     | 52        |
| 8e       | 2.283             | -2.327      | 22.34      | 0.223       | 30.233     | 54        |
| 9d       | 2.294             | -2.386      | 18.465     | 0.218       | 30.233     | 57        |
| 3a       | 2.334             | -2.388      | 22.34      | 0.214       | 3.186      | 50        |
| 8d       | 2.423             | -2.327      | 22.34      | 0.165       | 30.233     | 52        |
| 3g       | 2.603             | -2.386      | 22.34      | 0.2         | 3.186      | 53        |
| 5e       | 2.752             | -2.403      | 9.044      | 0.165       | 6.371      | 45        |
| 4d       | 2.759             | -2.394      | 18.465     | 0.252       | 6.371      | 57        |
| 4c       | 2.816             | -2.39       | 18.465     | 0.246       | 3.1860     | 57        |

|           |       |        |        |       |        |    |
|-----------|-------|--------|--------|-------|--------|----|
| <b>5d</b> | 2.828 | -2.385 | 9.044  | 0.183 | 3.1860 | 39 |
| <b>3f</b> | 2.828 | -2.386 | 22.34  | 0.206 | 3.1860 | 53 |
| <b>4a</b> | 2.907 | -2.39  | 18.465 | 0.261 | 3.1860 | 55 |
| <b>5b</b> | 2.923 | -2.332 | 9.044  | 0.238 | 3.1860 | 36 |
| <b>4e</b> | 3.498 | -2.391 | 18.465 | 0.294 | 3.1860 | 59 |
| <b>4b</b> | 3.594 | -2.39  | 18.465 | 0.252 | 3.1860 | 57 |
| <b>4f</b> | 3.729 | -2.389 | 18.465 | 0.252 | 3.1860 | 58 |
| <b>4g</b> | 3.865 | -2.389 | 18.465 | 0.246 | 3.1860 | 58 |

\*Compounds **6c** and **7e** were excluded as statistical outliers with Z-score exceeded 2.4.

**Table S2.** The calculated 2D descriptors of the training set analogs against *hCA* XII that governed the activity according to equation 2.

| Training set |                    |               |                |       |            |  |
|--------------|--------------------|---------------|----------------|-------|------------|--|
| Compd.       | Log K <sub>i</sub> | PEOE_VSA_FHYD | PEOE_VSA_FPPOS | Q_PC+ | SlogP_VSA1 |  |
| <b>2h</b>    | 0.903              | 0.658         | 0.118          | 6.221 | 82.388     |  |
| <b>9a</b>    | 1.342              | 0.73          | 0.097          | 7.933 | 84.716     |  |
| <b>9e</b>    | 1.342              | 0.743         | 0.09           | 8.145 | 84.716     |  |
| <b>8e</b>    | 1.491              | 0.781         | 0.072          | 6.776 | 79.334     |  |
| <b>8a</b>    | 1.519              | 0.769         | 0.078          | 6.564 | 79.334     |  |
| <b>8c</b>    | 1.623              | 0.779         | 0.074          | 6.591 | 79.334     |  |
| <b>5e</b>    | 1.623              | 0.813         | 0.047          | 6.057 | 56.187     |  |
| <b>8b</b>    | 1.681              | 0.741         | 0.077          | 6.604 | 79.334     |  |
| <b>6b</b>    | 1.756              | 0.799         | 0.055          | 5.484 | 74.075     |  |
| <b>7b</b>    | 1.792              | 0.747         | 0.082          | 6.853 | 79.457     |  |

|           |       |       |       |       |         |
|-----------|-------|-------|-------|-------|---------|
| <b>5c</b> | 1.881 | 0.781 | 0.055 | 5.163 | 56.187  |
| <b>9b</b> | 1.898 | 0.706 | 0.096 | 7.973 | 84.716  |
| <b>5a</b> | 1.919 | 0.744 | 0.064 | 5.233 | 74.198  |
| <b>9c</b> | 1.934 | 0.74  | 0.093 | 7.96  | 84.716  |
| <b>7c</b> | 1.964 | 0.758 | 0.078 | 6.853 | 79.457  |
| <b>9d</b> | 2.114 | 0.747 | 0.091 | 7.894 | 84.716  |
| <b>7d</b> | 2.283 | 0.768 | 0.075 | 7.441 | 79.457  |
| <b>6a</b> | 2.439 | 0.779 | 0.06  | 5.554 | 92.086  |
| <b>7e</b> | 2.452 | 0.788 | 0.069 | 7.747 | 79.457  |
| <b>3b</b> | 2.676 | 0.797 | 0.068 | 7.378 | 97.345  |
| <b>3e</b> | 2.777 | 0.798 | 0.066 | 7.563 | 97.345  |
| <b>7a</b> | 2.78  | 0.726 | 0.088 | 6.923 | 97.468  |
| <b>3c</b> | 2.787 | 0.802 | 0.067 | 7.312 | 97.345  |
| <b>3d</b> | 2.851 | 0.796 | 0.069 | 7.345 | 97.345  |
| <b>3g</b> | 2.884 | 0.802 | 0.067 | 7.312 | 97.345  |
| <b>4a</b> | 2.884 | 0.75  | 0.09  | 8.72  | 102.726 |
| <b>4g</b> | 2.926 | 0.764 | 0.085 | 8.681 | 102.726 |
| <b>6d</b> | 2.98  | 0.818 | 0.05  | 6.072 | 74.075  |
| <b>4e</b> | 3.182 | 0.76  | 0.084 | 8.932 | 102.726 |
| <b>3f</b> | 3.518 | 0.797 | 0.068 | 7.378 | 97.345  |
| <b>3a</b> | 3.562 | 0.788 | 0.071 | 7.351 | 97.345  |
| <b>4b</b> | 3.703 | 0.758 | 0.087 | 8.747 | 102.726 |
| <b>4d</b> | 3.78  | 0.758 | 0.087 | 8.714 | 102.726 |

\*Compound **6e** was excluded as statistical outlier with Z-score exceeded 2.4.

# <sup>1</sup>H NMR and <sup>13</sup>C spectra for the new synthesized compounds

Mona Fikry\_H\_2Bris

Microanalytical Unit - FOPCU - NMR laboratory  
www.pharma.cu.edu.eg dir-mau.fopcu@pharma.cu.edu.eg

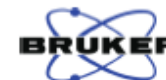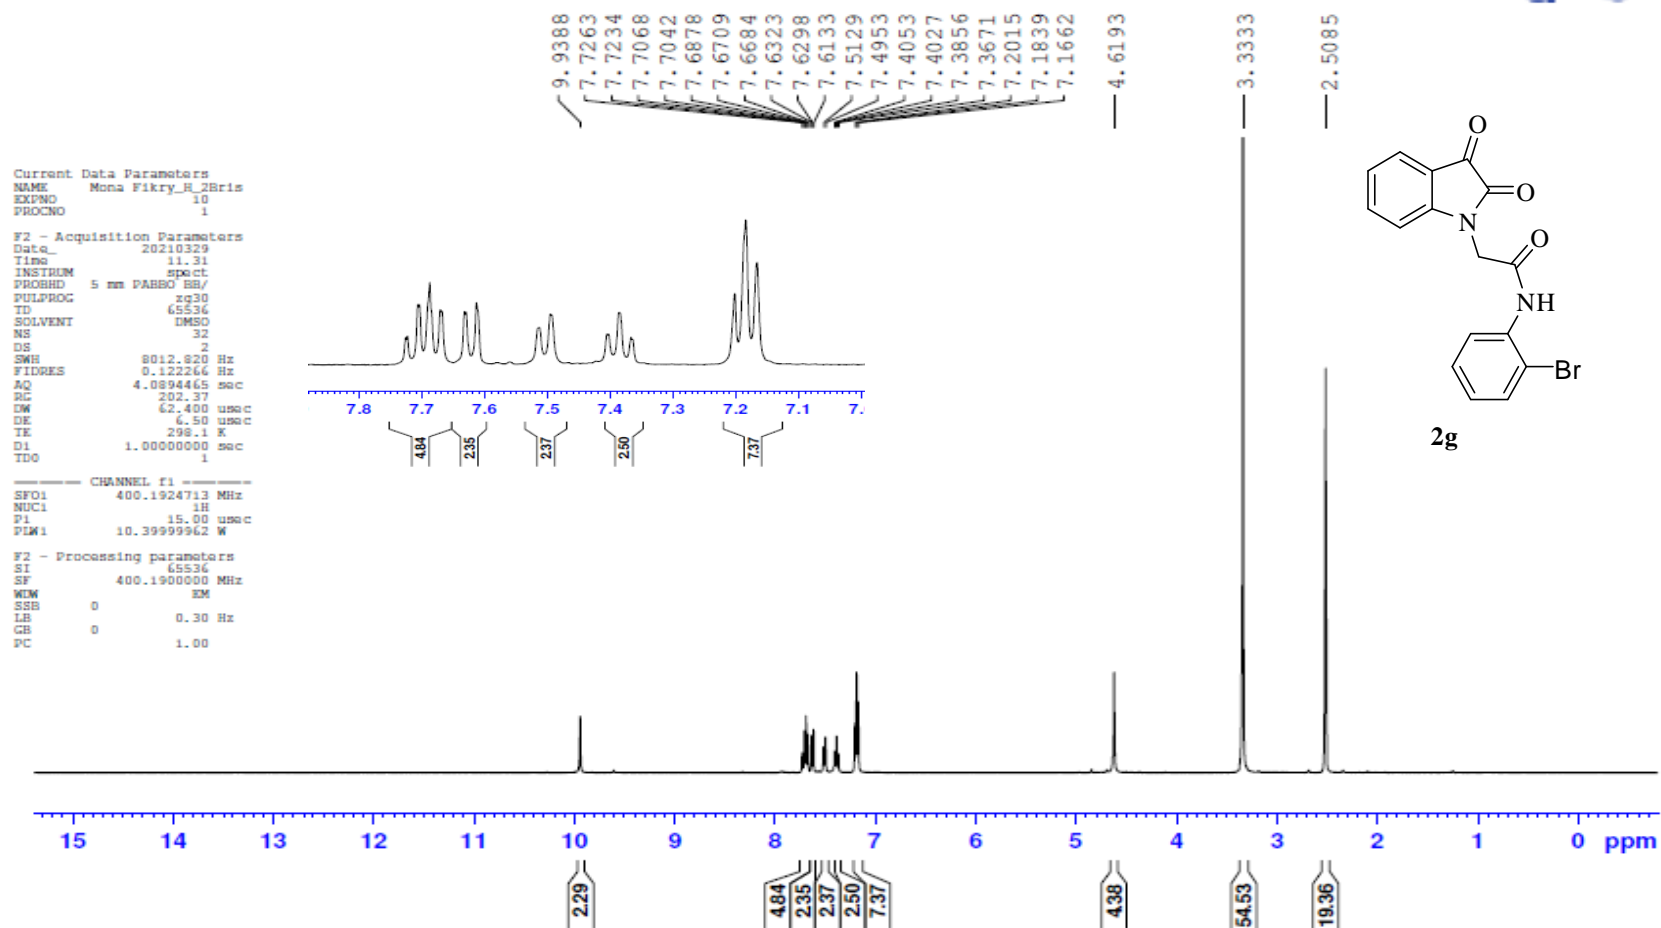

Figure S17. <sup>1</sup>H NMR of compound 2g.



Mona Fikry\_C\_2Br-is

Microanalytical Unit - FOPCU - NMR laboratory  
www.pharma.cu.edu.eg dir-mau.fopcu@pharma.cu.edu.eg

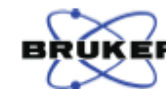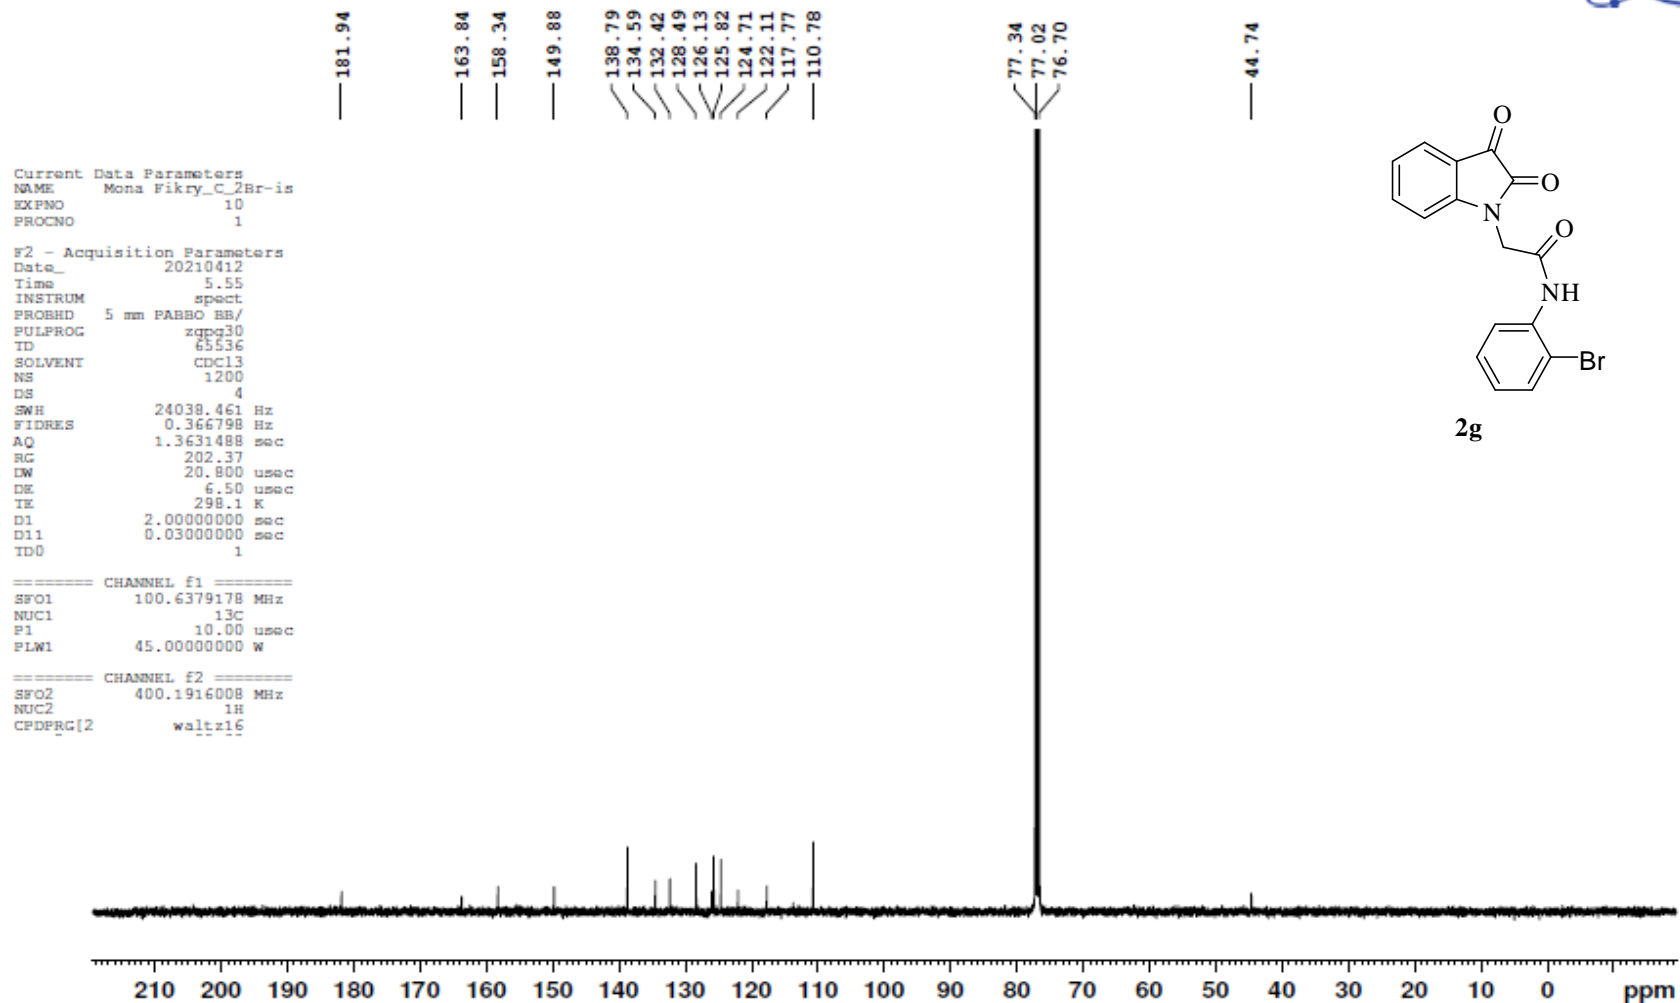

Figure S18. <sup>13</sup>C NMR of compound 2g.

Riham Francois\_H\_ISAC

Microanalytical Unit - FOPCU - NMR laboratory  
www.pharma.cu.edu.eg dir-mau.fopcu@pharma.cu.edu.eg

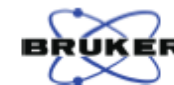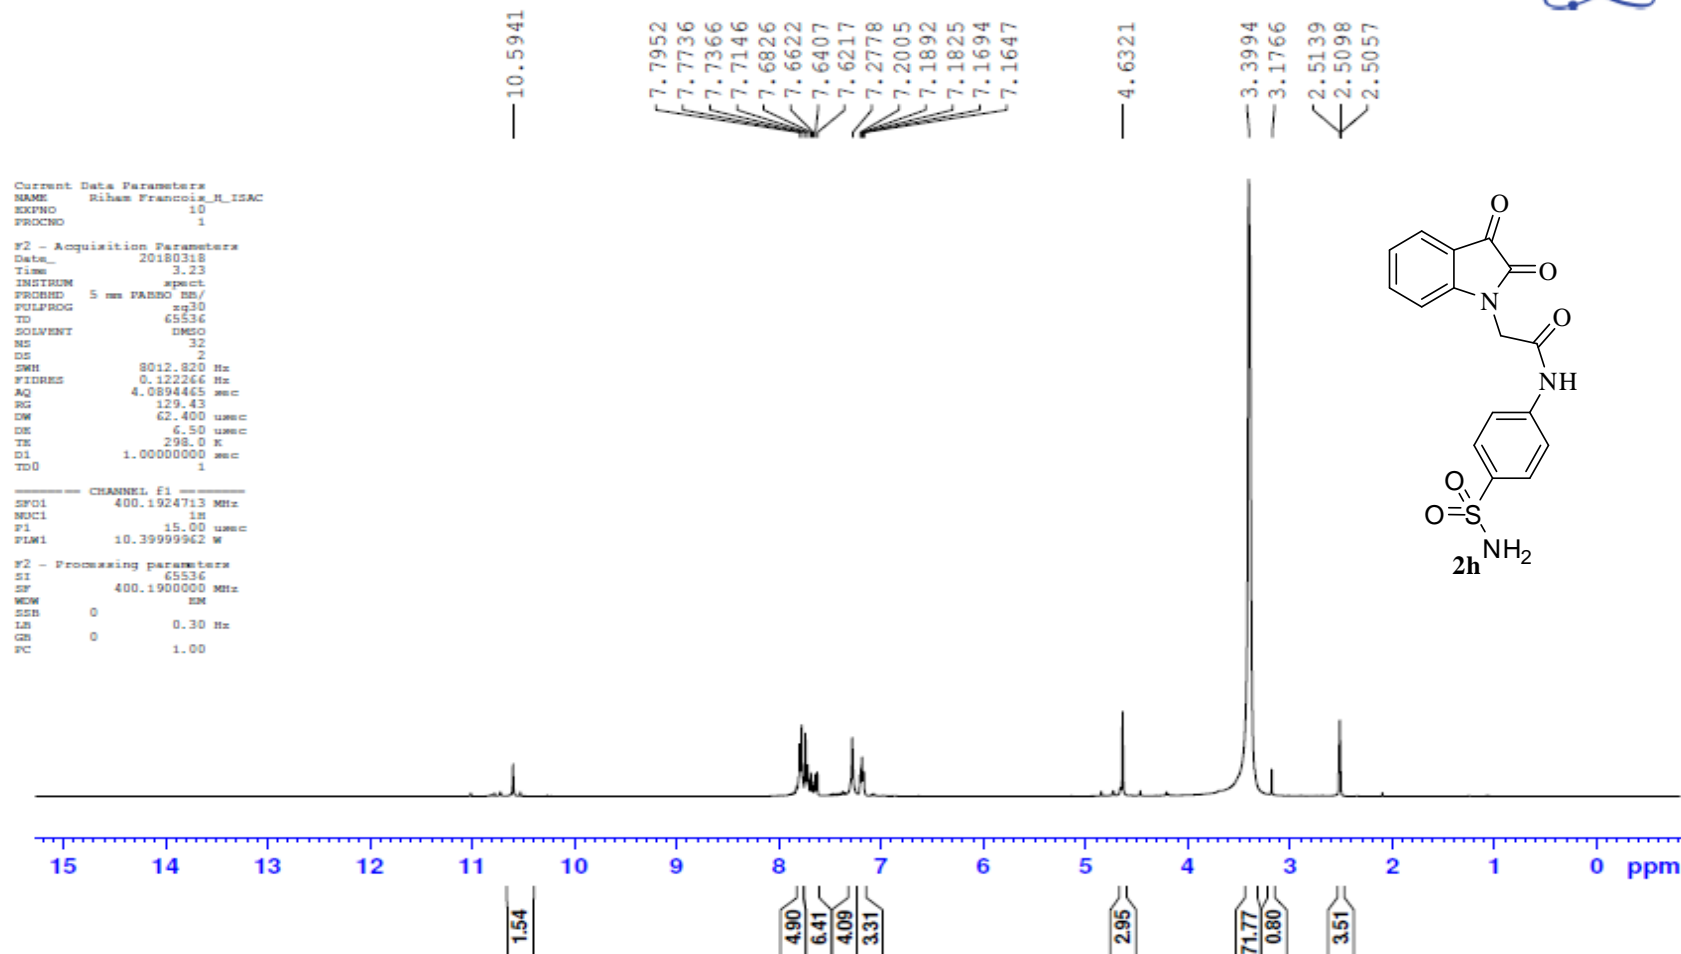

Figure S19. <sup>1</sup>H NMR of compound 2h.

Riham Francois\_C\_ACSN

Microanalytical Unit - FOPCU - NMR laboratory  
www.pharma.cu.edu.eg dir-mau.fopcu@pharma.cu.edu.eg

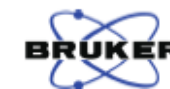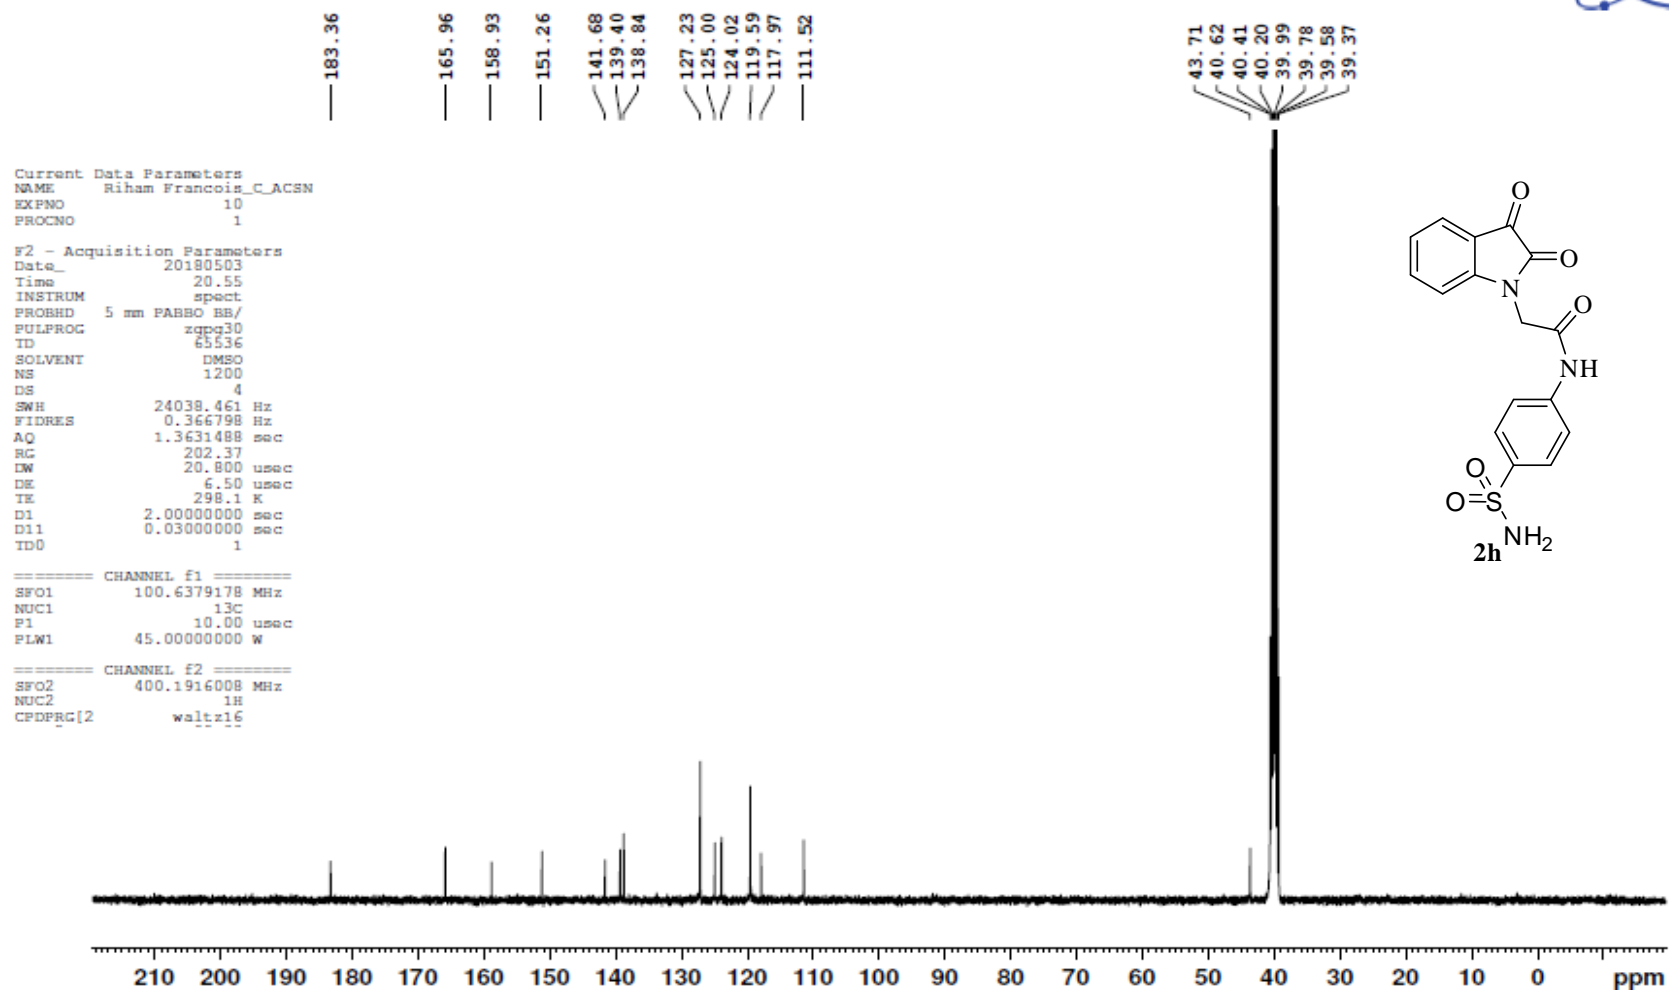

Figure S20. <sup>13</sup>C NMR of compound 2h.

Mona Fikry\_H\_IHCl

Microanalytical Unit - FOPCU - NMR laboratory  
www.pharma.cu.edu.eg dir-mau.fopcu@pharma.cu.edu.eg

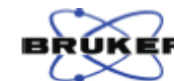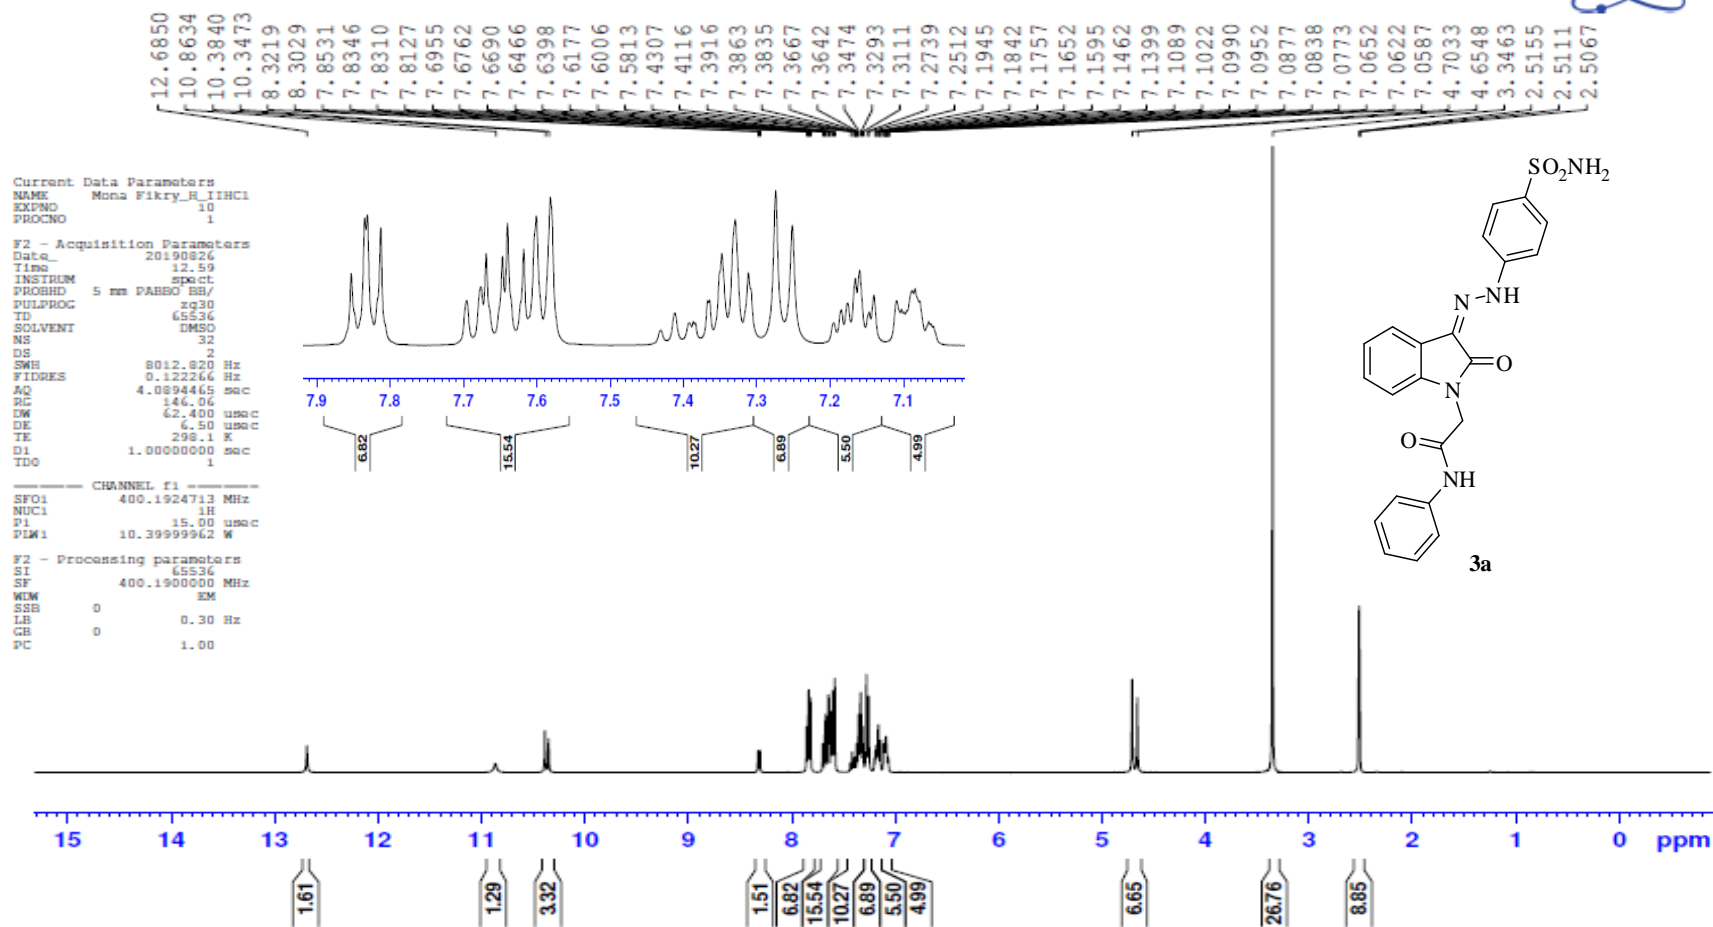

Figure S21. <sup>1</sup>H NMR of compound 3a.

Mona Fikry\_C\_II-HCl

Microanalytical Unit - FOPCU - NMR laboratory  
www.pharma.cu.edu.eg dir-mau.fopcu@pharma.cu.edu.eg

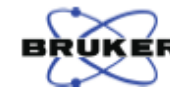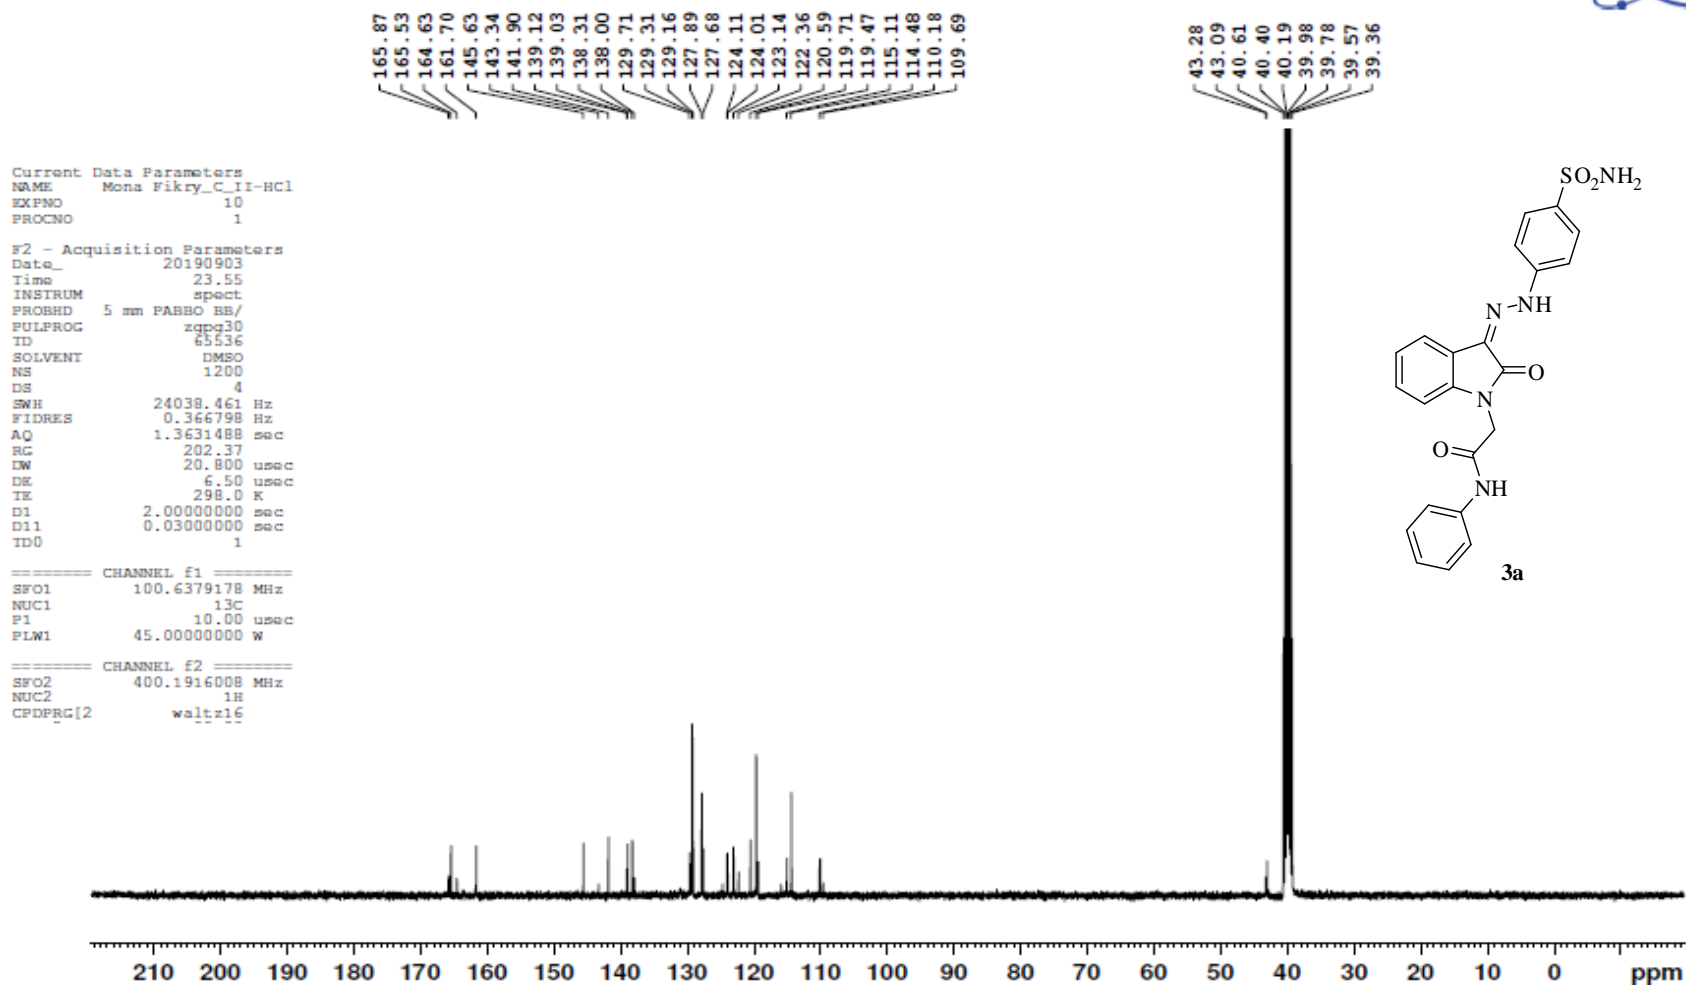

Figure S22. <sup>13</sup>C NMR of compound 3a.

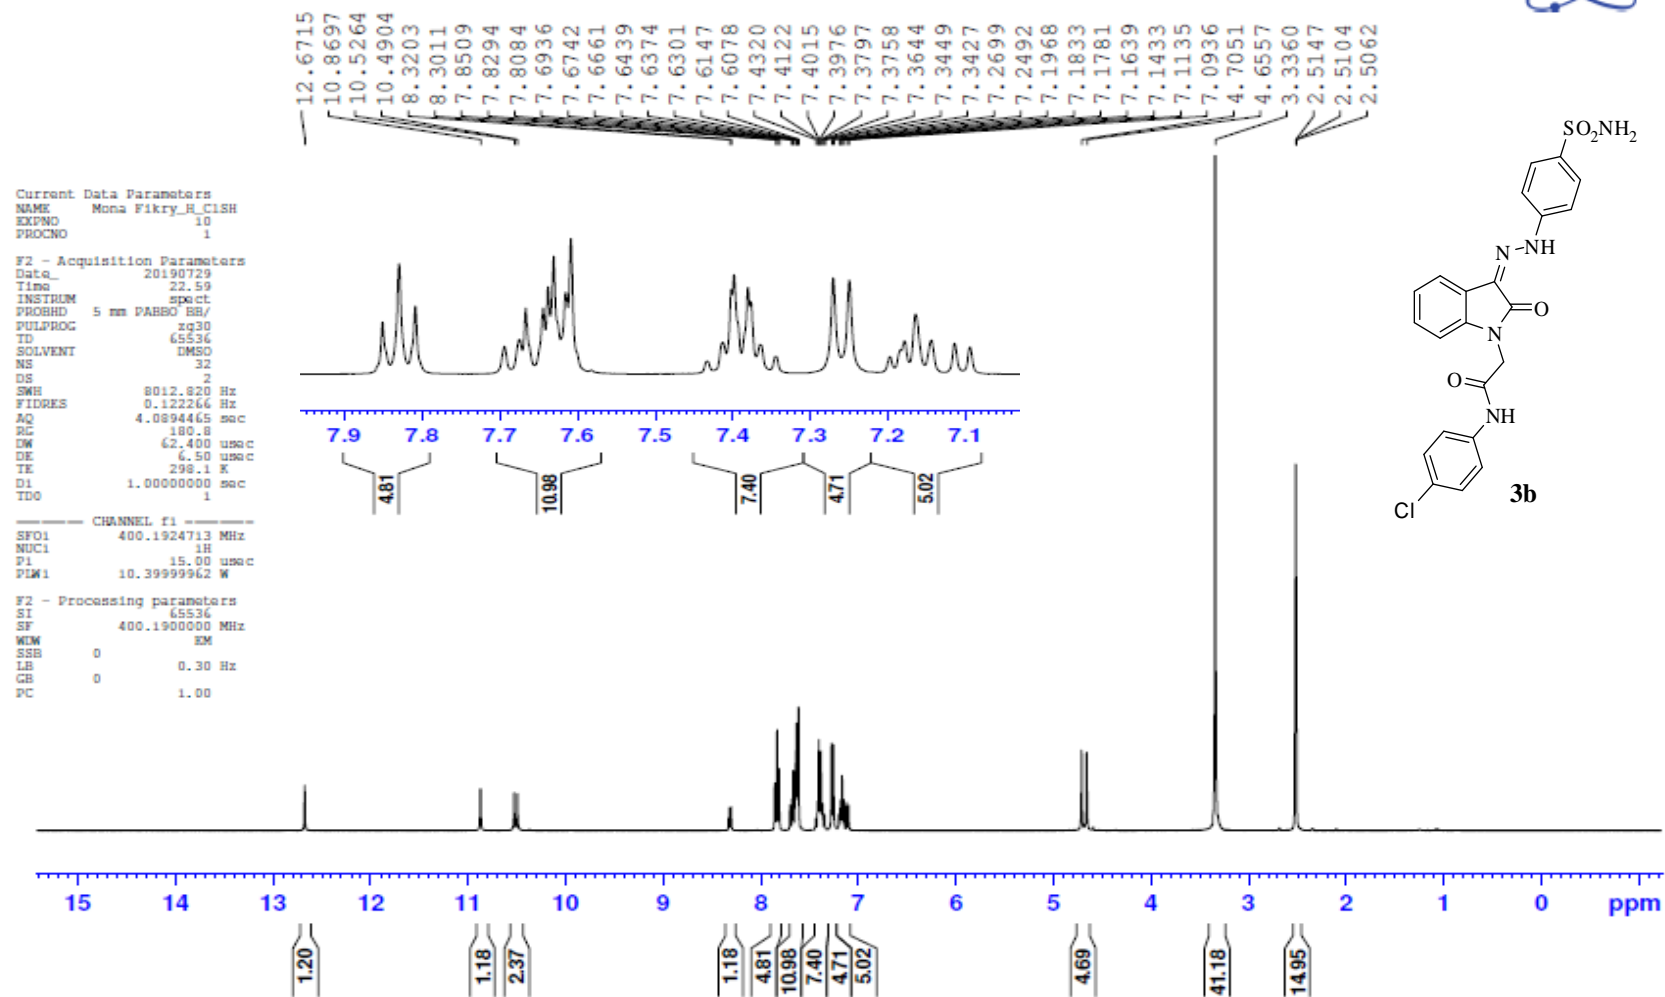Figure S23. <sup>1</sup>H NMR of compound 3b.

Mona Fikry\_C\_CISH

Microanalytical Unit - FOPCU - NMR laboratory  
www.pharma.cu.edu.eg dir-mau.fopcu@pharma.cu.edu.eg

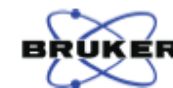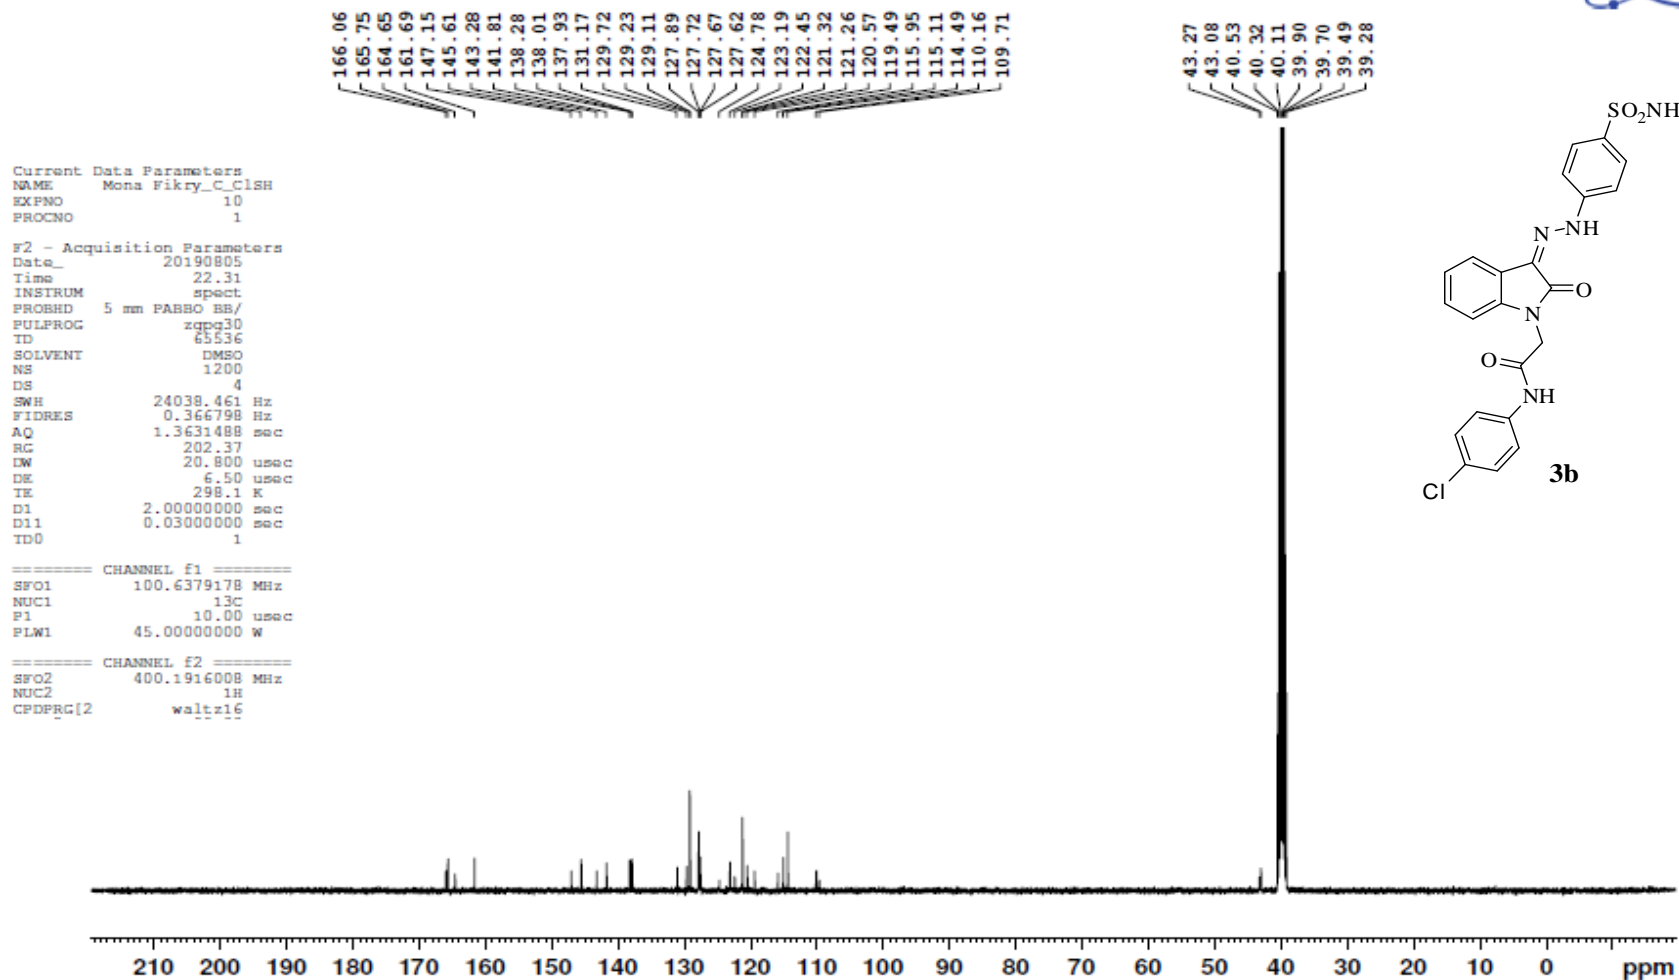

Figure S24. <sup>13</sup>C NMR of compound 3b.

Mona Fikry\_H\_BrSH

Microanalytical Unit - FOPCU - NMR laboratory  
www.pharma.cu.edu.eg dir-mau.fopcu@pharma.cu.edu.eg

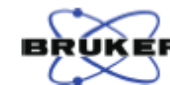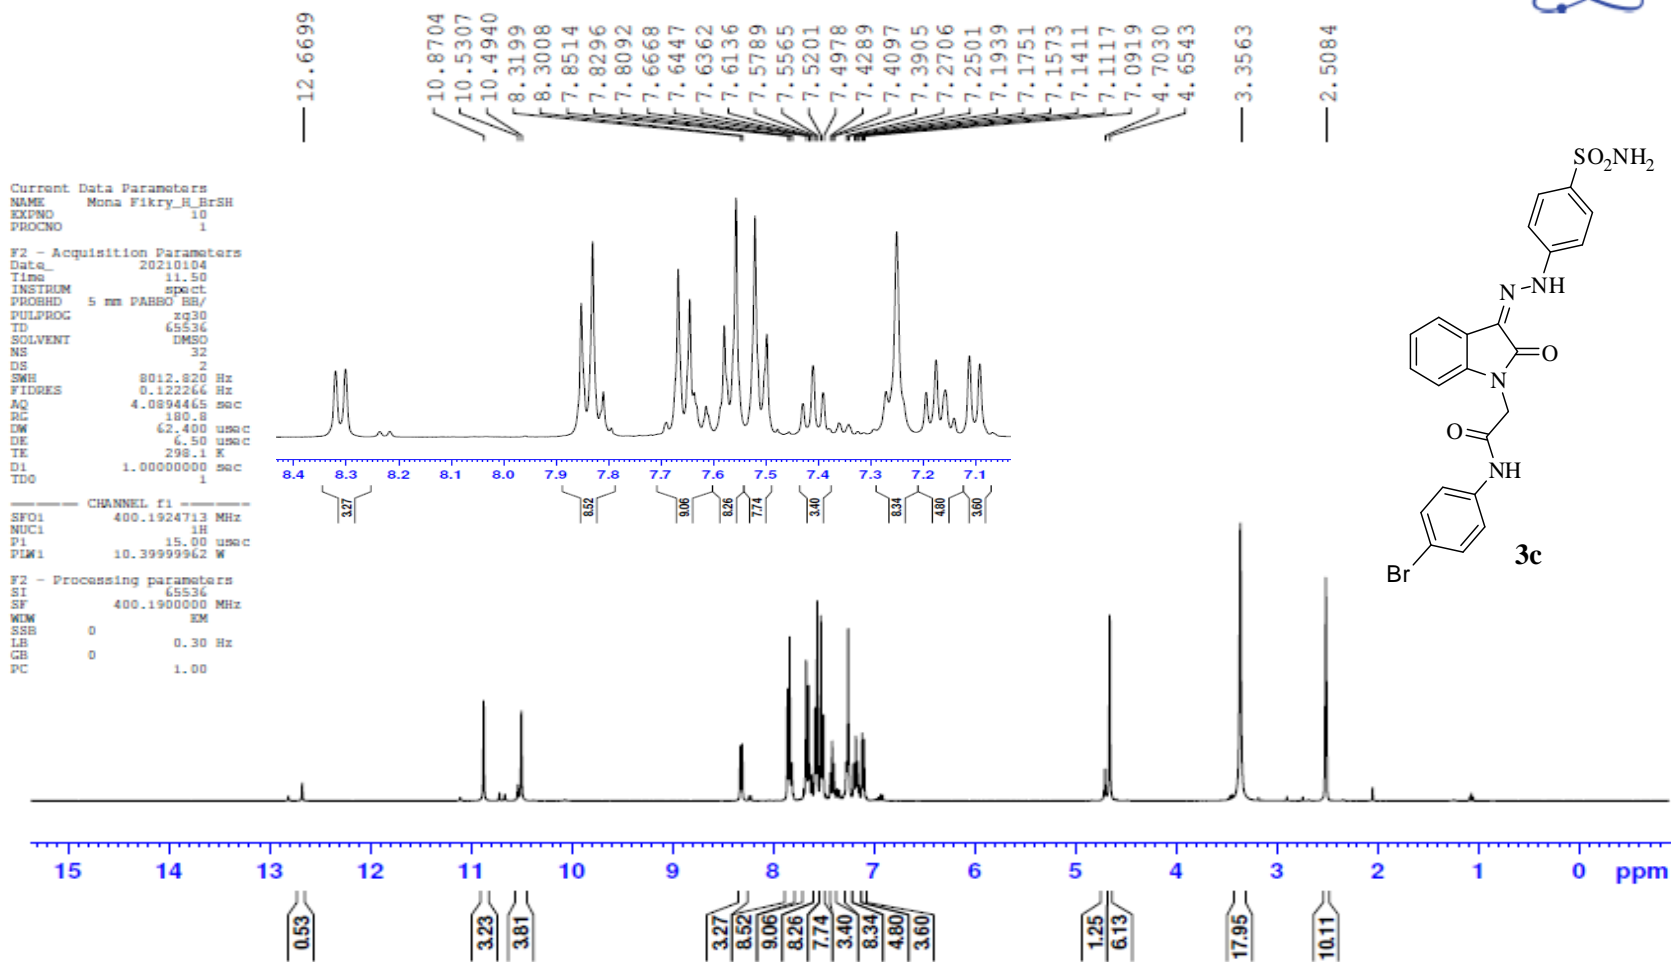

Figure S25. <sup>1</sup>H NMR of compound **3c**.



Mona Fikry\_C\_BrSH

Microanalytical Unit - FOPCU - NMR laboratory  
www.pharma.cu.edu.eg dir-mau.fopcu@pharma.cu.edu.eg

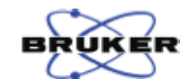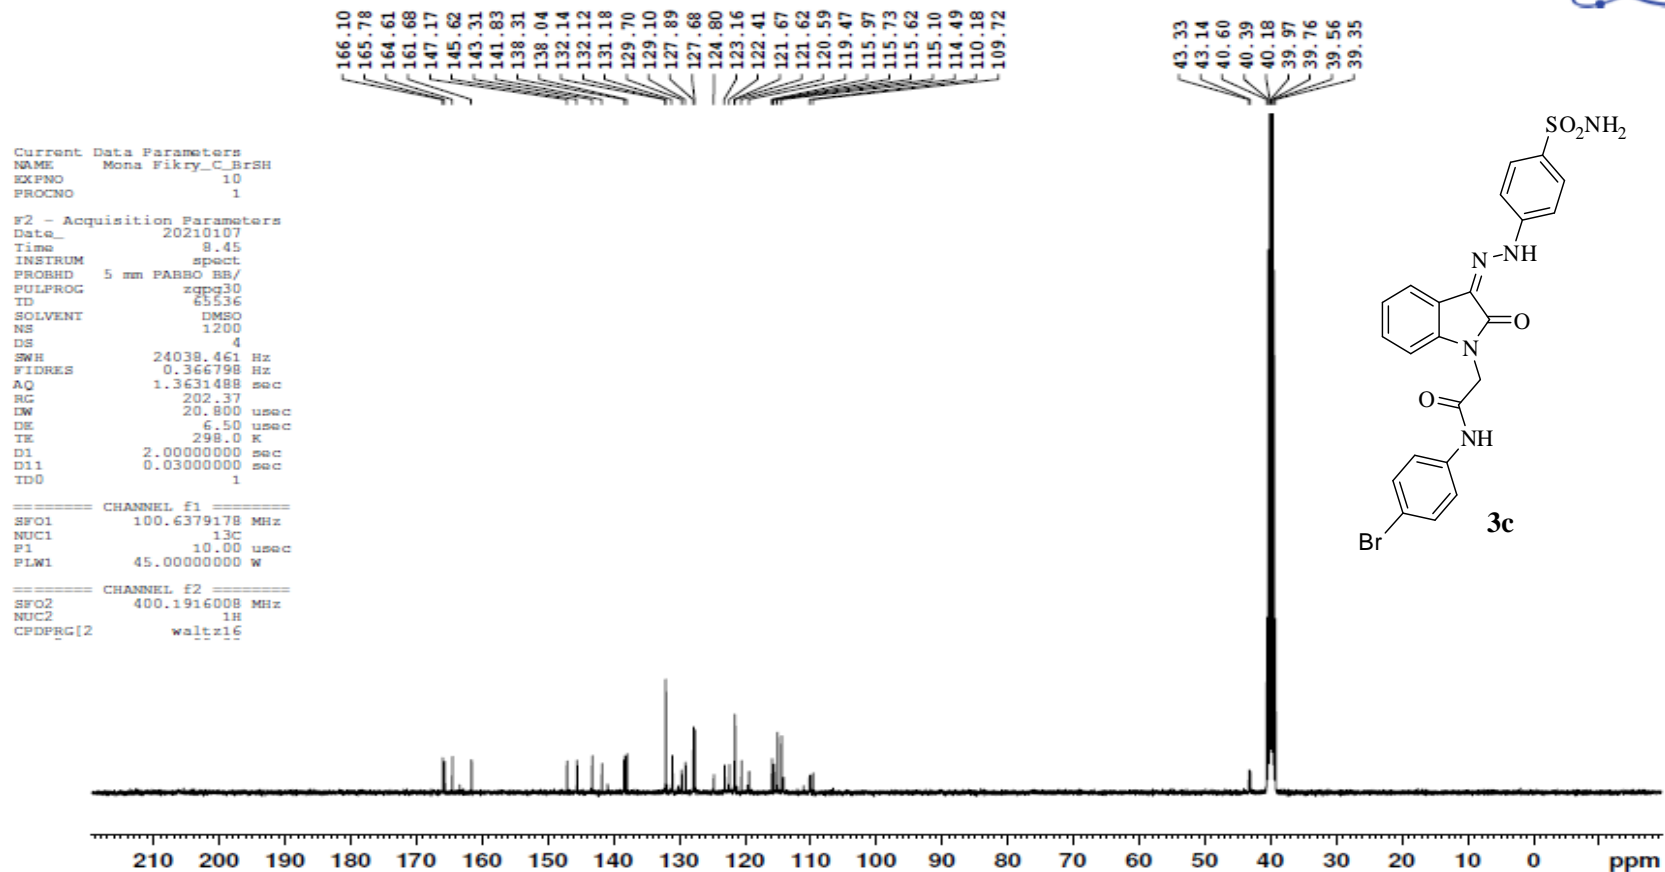

Figure S26. <sup>13</sup>C NMR of compound 3c.

Mona Fikry\_H\_CH3-SH

Microanalytical Unit - FOPCU - NMR laboratory  
www.pharma.cu.edu.eg dir-mau.fopcu@pharma.cu.edu.eg

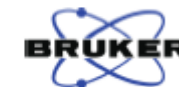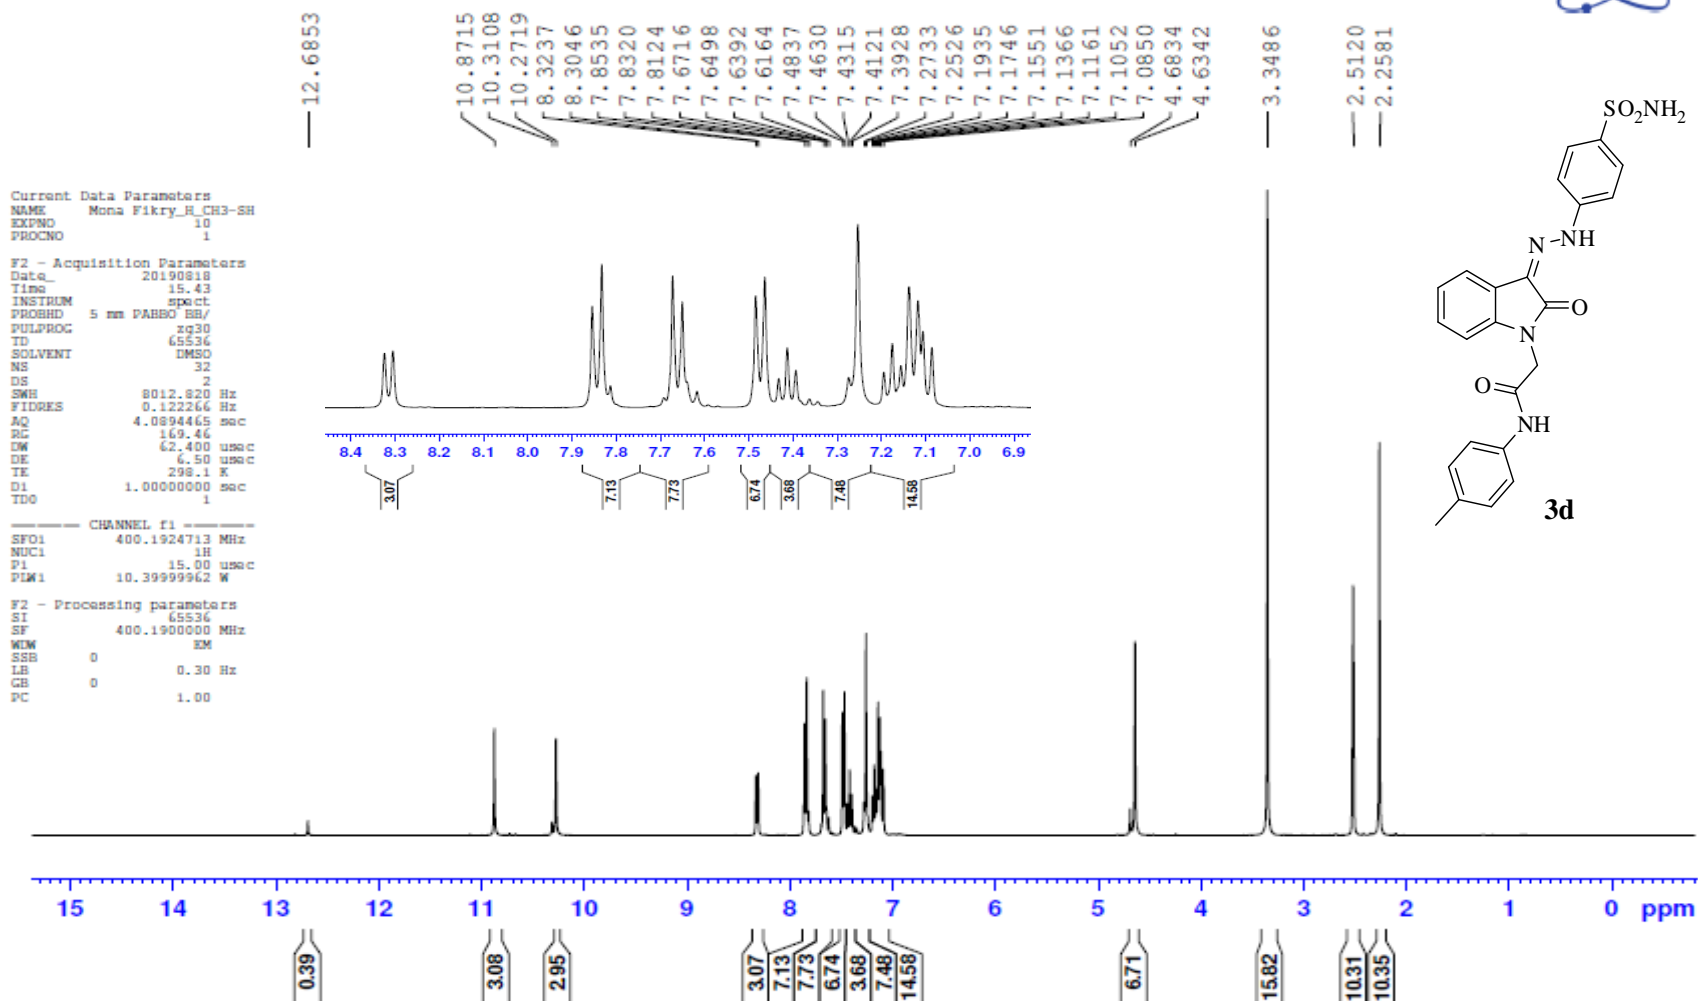

Figure S27. <sup>1</sup>H NMR of compound 3d.

Mona Fikry\_C\_CH3-SH

Microanalytical Unit - FOPCU - NMR laboratory  
www.pharma.cu.edu.eg dir-mau.fopcu@pharma.cu.edu.eg

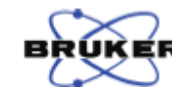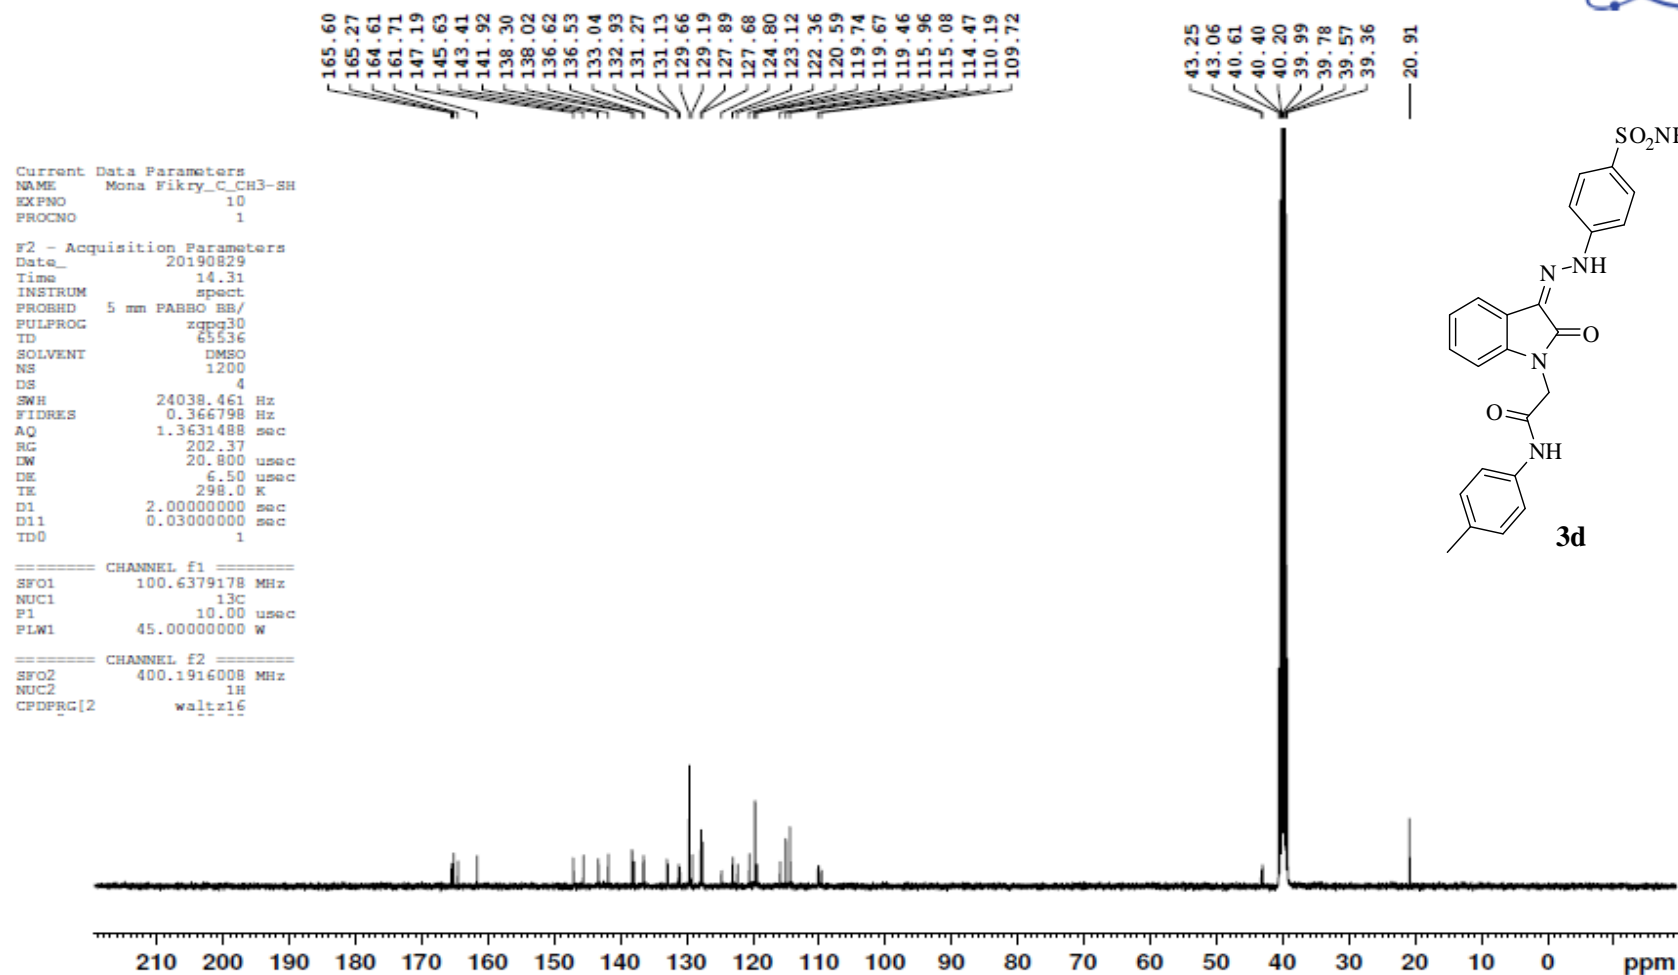

Figure S28. <sup>13</sup>C NMR of compound 3d.

Mona Fikry\_H\_OCH3-SH

Microanalytical Unit - FOPCU - NMR laboratory  
www.pharma.cu.edu.eg dir-mau.fopcu@pharma.cu.edu.eg

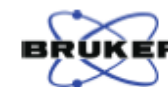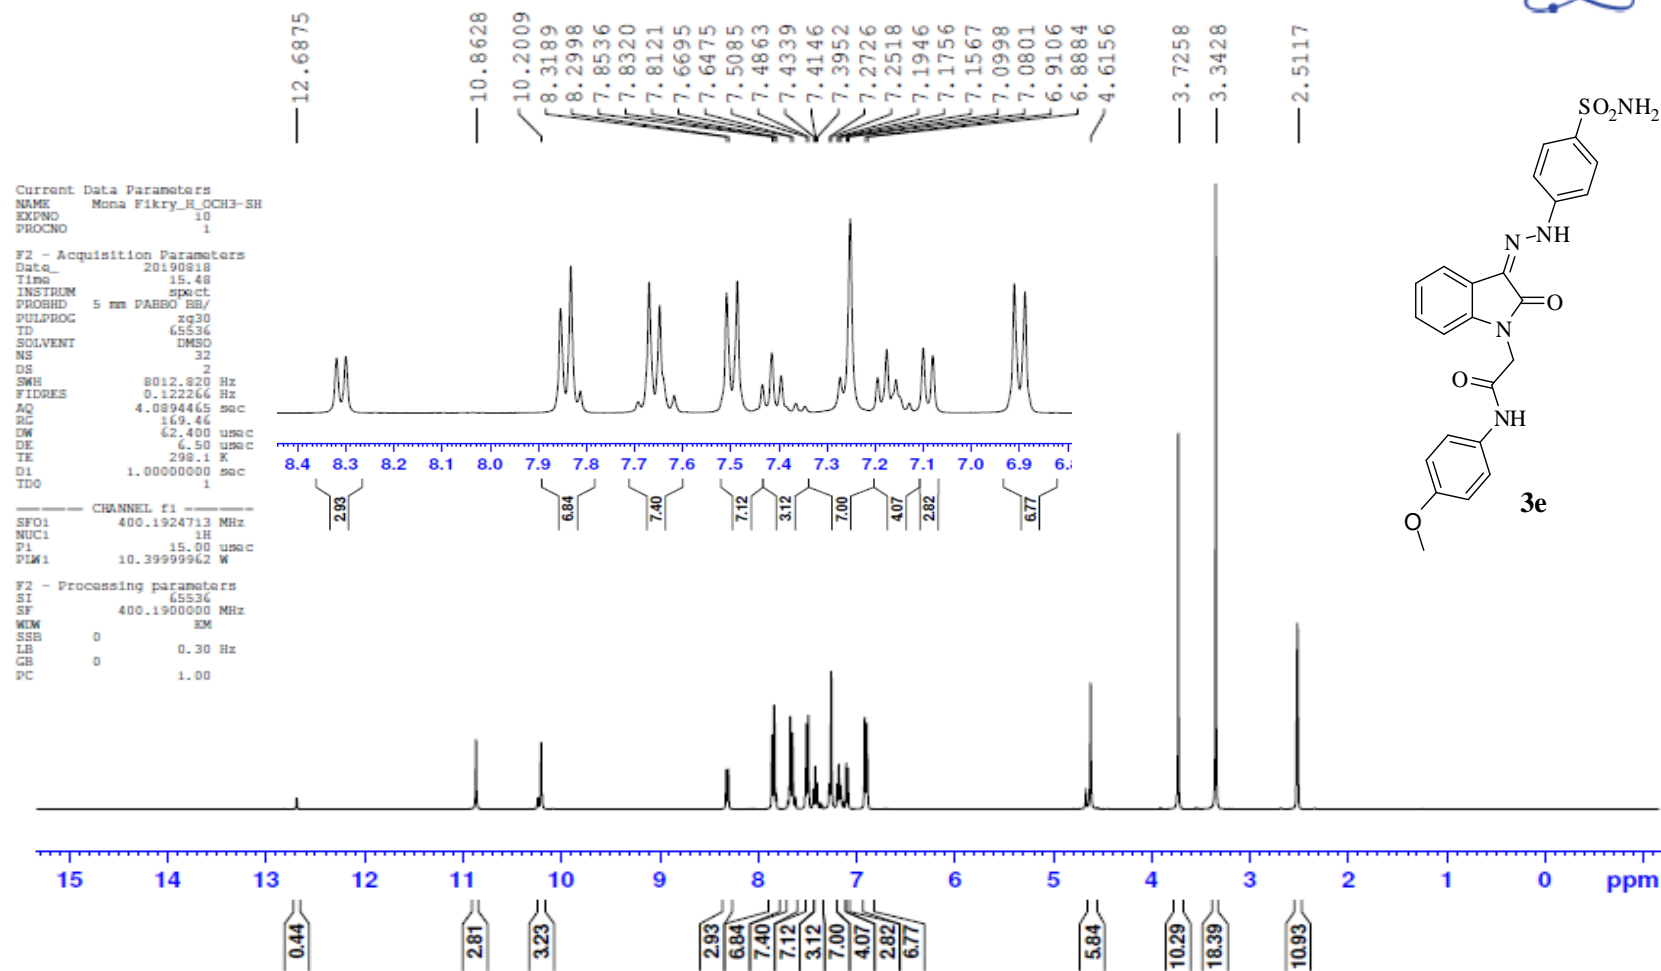

Figure S29. <sup>1</sup>H NMR of compound 3e.

Mona Fikry\_C\_OCH3-SH

Microanalytical Unit - FOPCU - NMR laboratory  
www.pharma.cu.edu.eg dir-mau.fopcu@pharma.cu.edu.eg

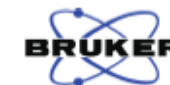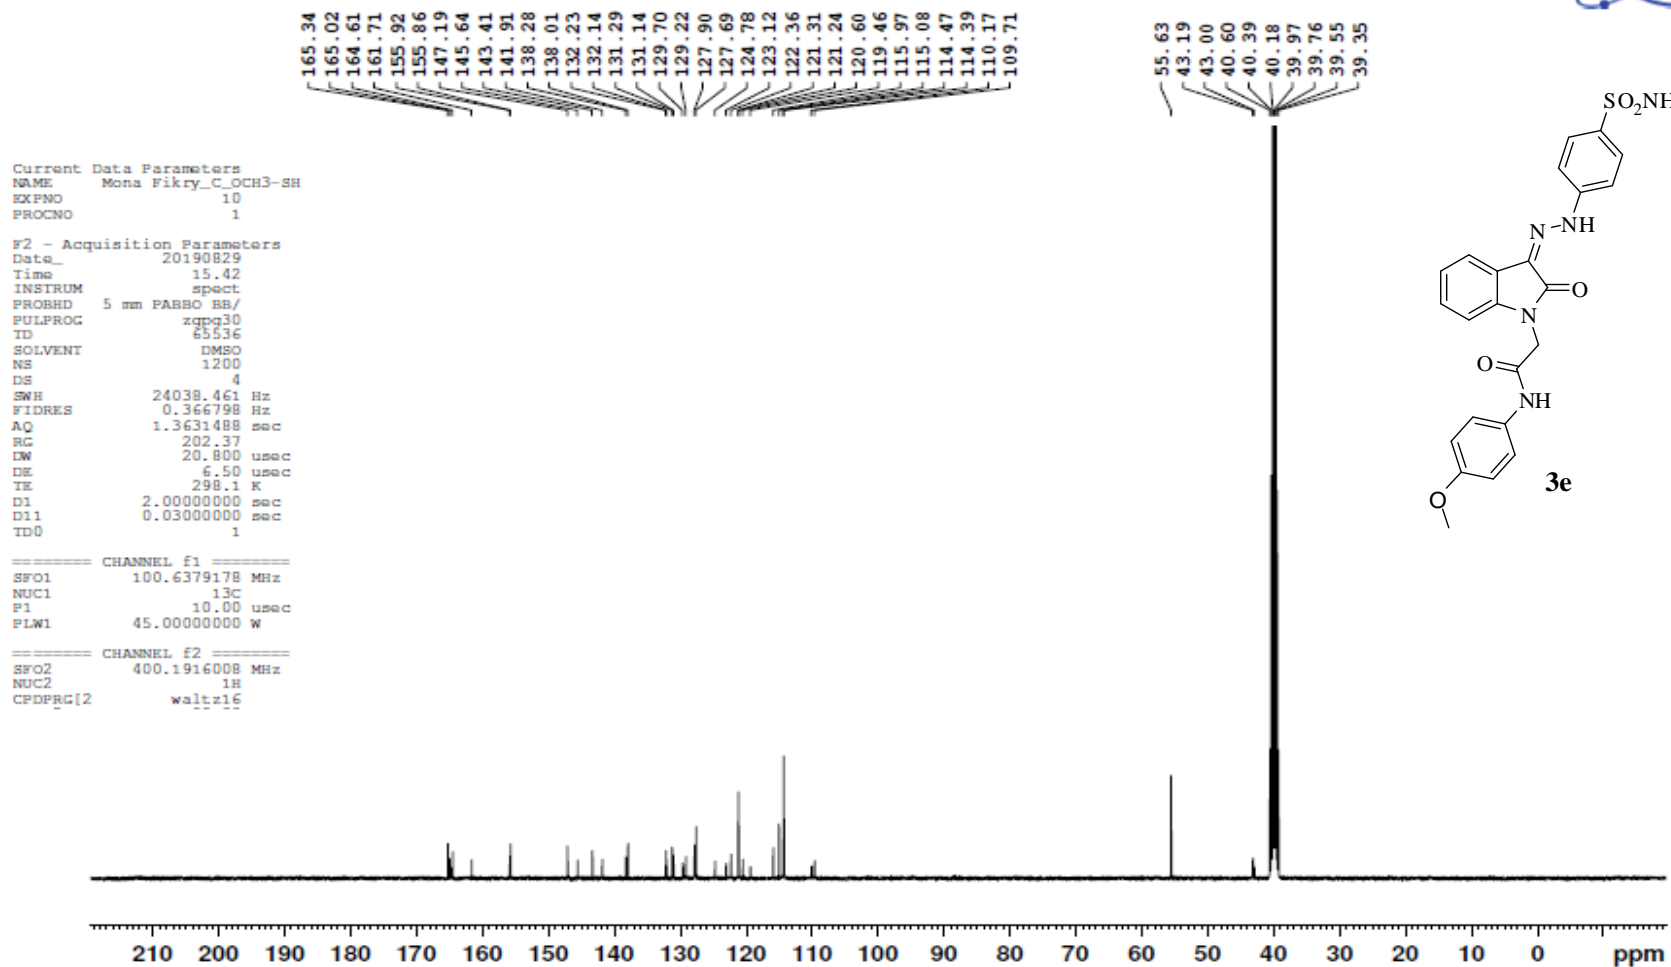

Figure S30. <sup>13</sup>C NMR of compound 3e.

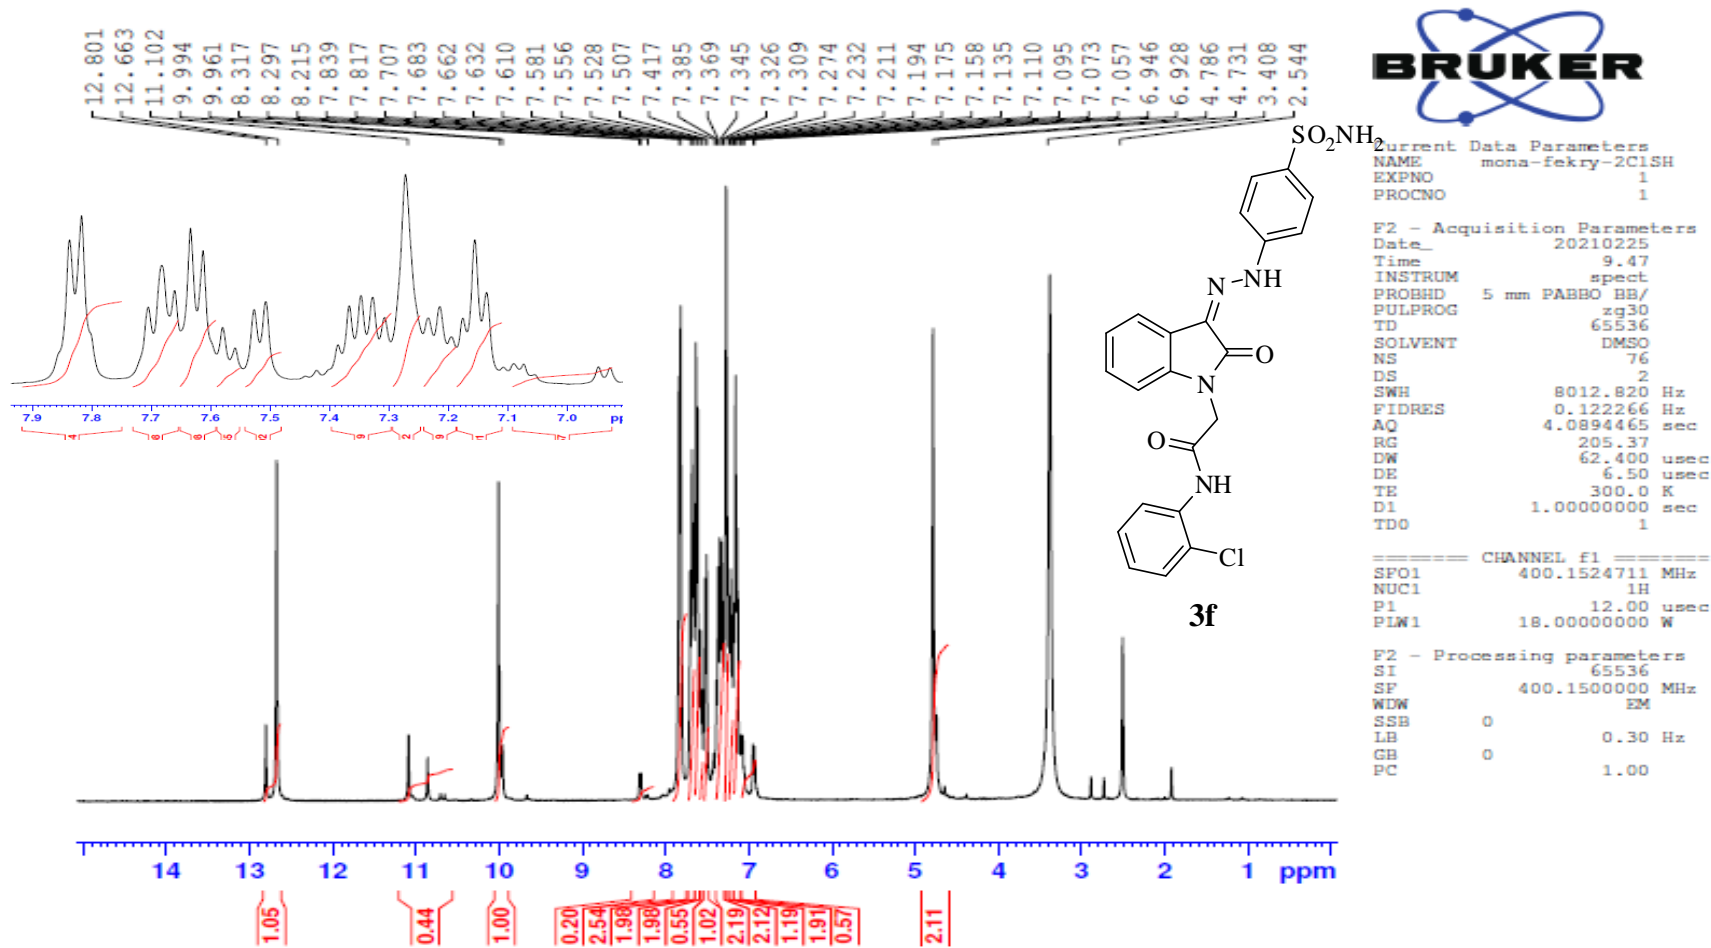

Figure S31. <sup>1</sup>H NMR of compound 3f.

Mona Fikry\_C\_2Cl-SH

Microanalytical Unit - FOPCU - NMR laboratory  
www.pharma.cu.edu.eg dir-mau.fopcu@pharma.cu.edu.eg

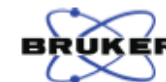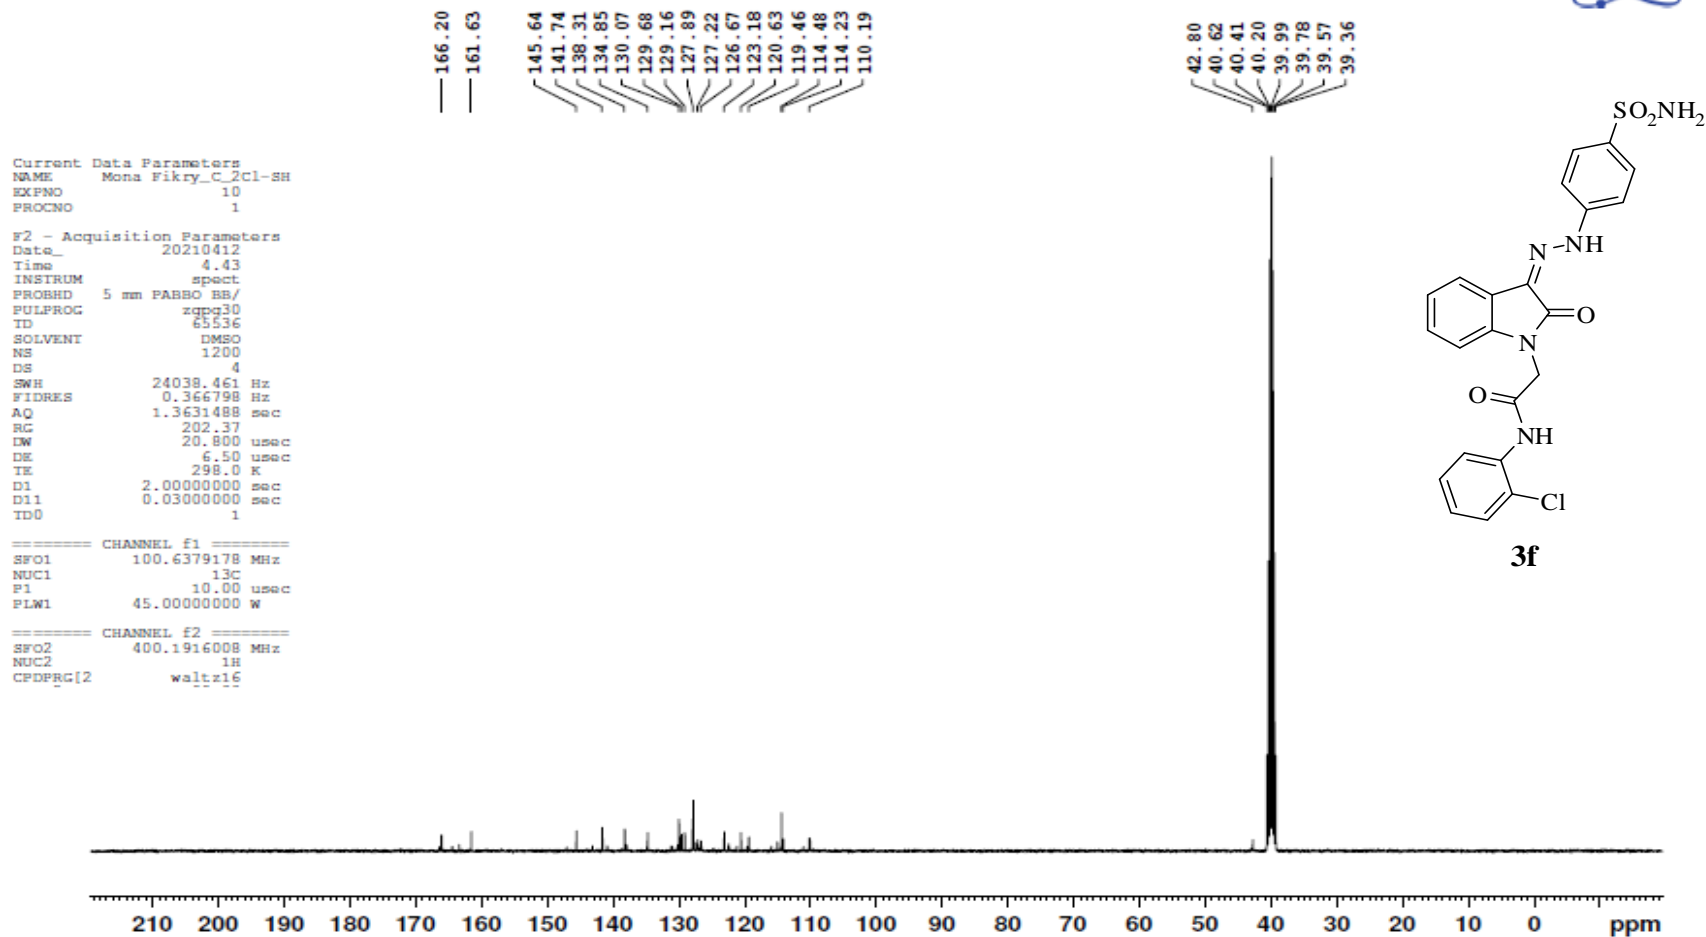

Figure S32. <sup>13</sup>C NMR of compound 3f.

Mona Fikry\_H\_2BrSH

Microanalytical Unit - FOPCU - NMR laboratory  
www.pharma.cu.edu.eg dir-mau.fopcu@pharma.cu.edu.eg

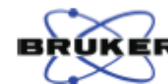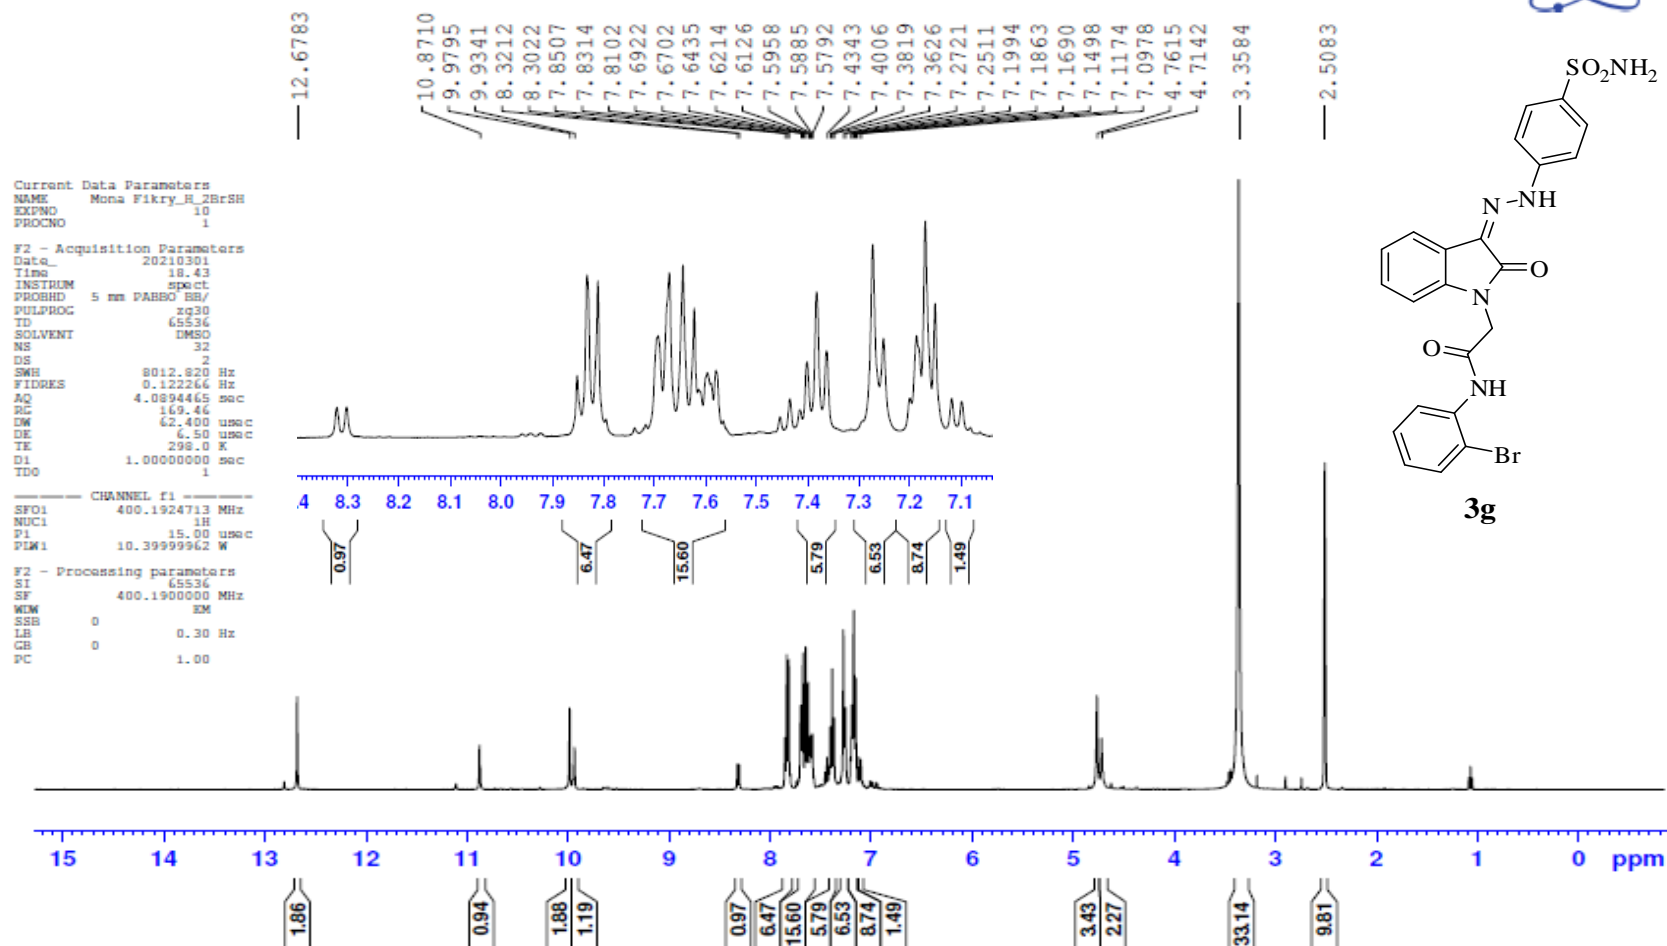

Figure S33. <sup>1</sup>H NMR of compound 3g.



Mona Fikry\_C\_2Brsh

Microanalytical Unit - FOPCU - NMR laboratory  
www.pharma.cu.edu.eg dir-mau.fopcu@pharma.cu.edu.eg

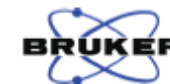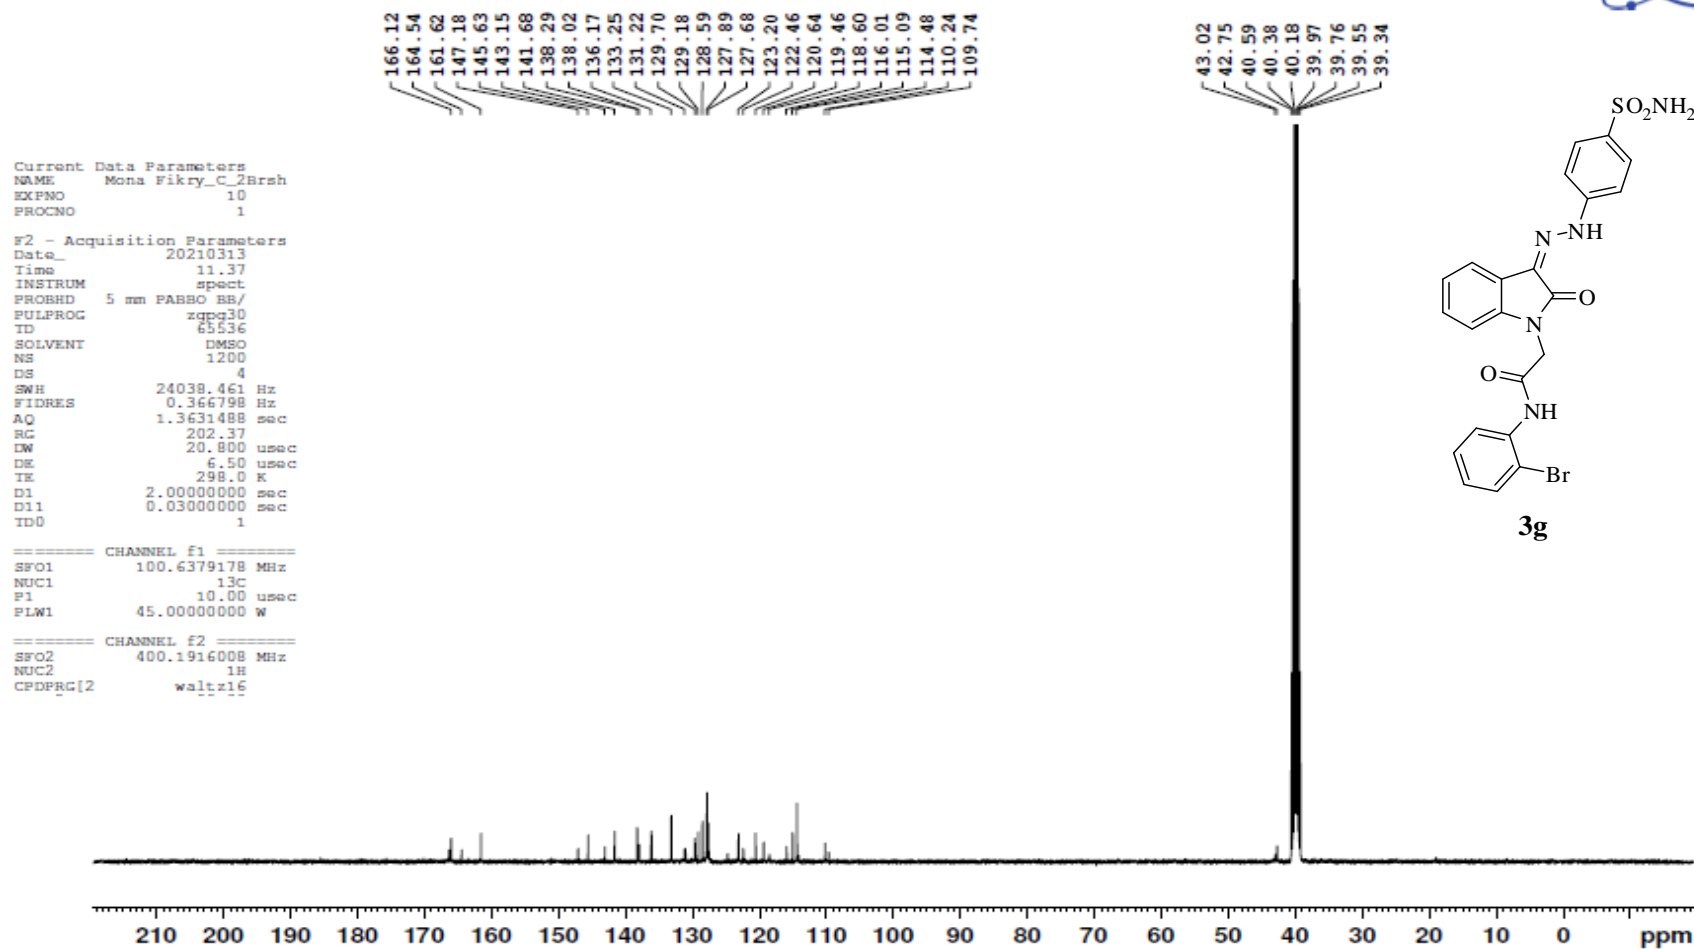

Figure S34. <sup>13</sup>C NMR of compound 3g.

Mona Fikry\_H\_IICO

Microanalytical Unit - FOPCU - NMR laboratory  
www.pharma.cu.edu.eg dir-mau.fopcu@pharma.cu.edu.eg

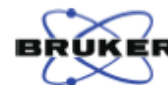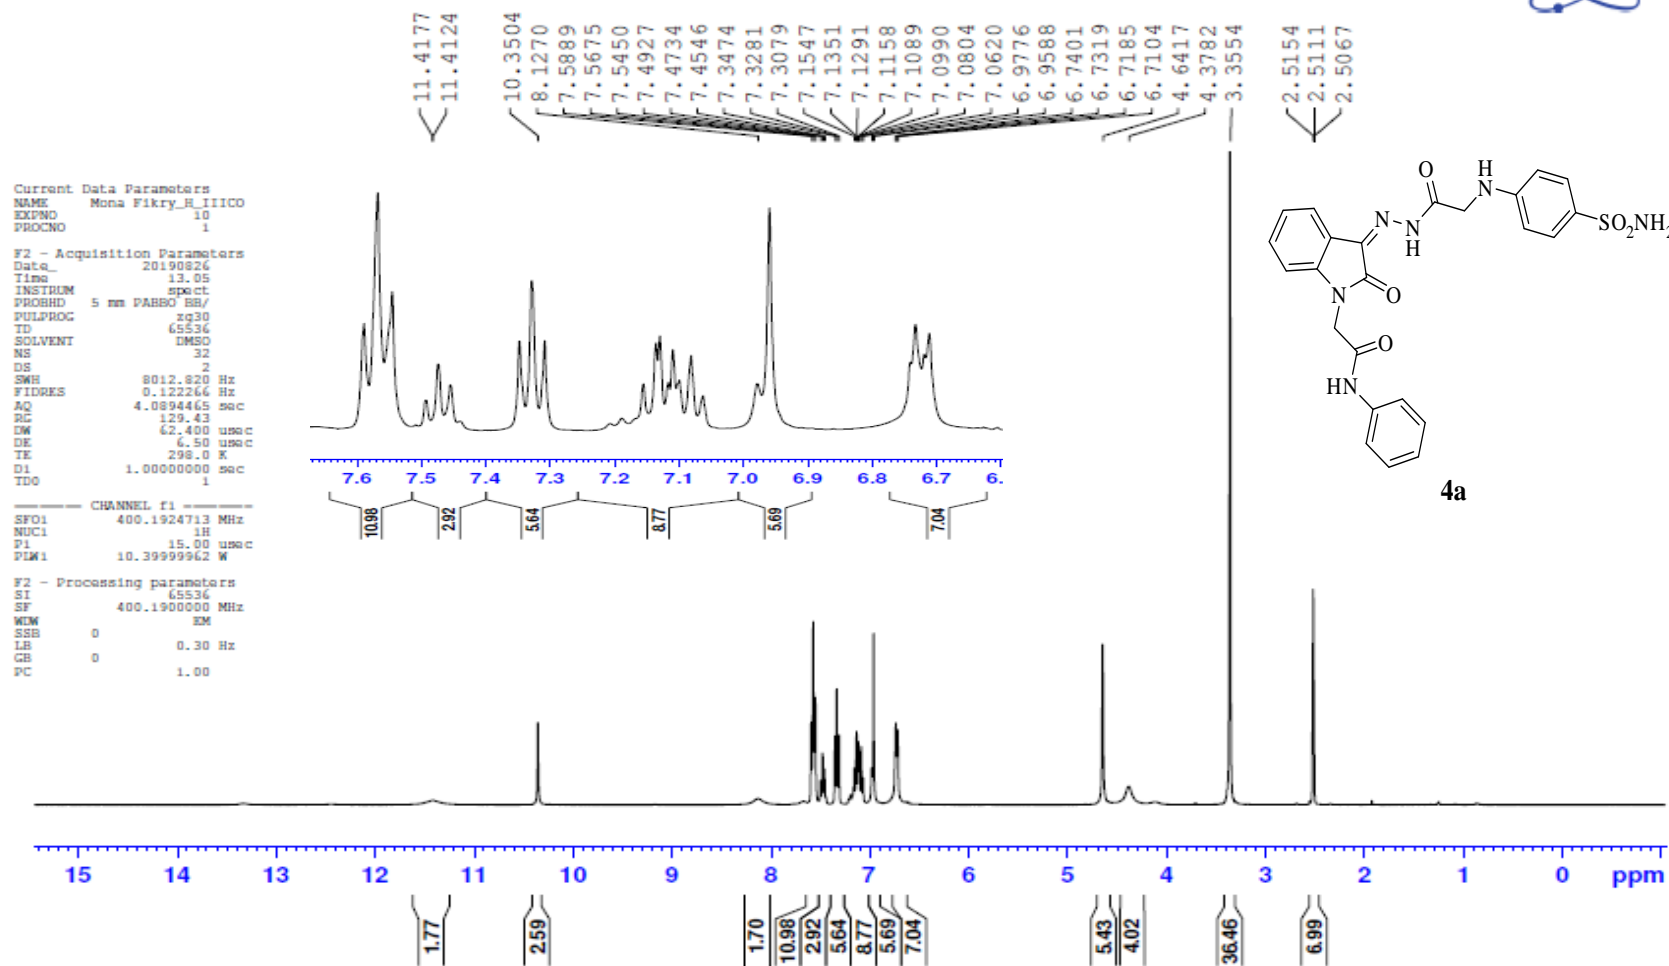

Figure S35. <sup>1</sup>H NMR of compound 4a.

Mona Fikry\_C\_II-CO

Microanalytical Unit - FOPCU - NMR laboratory  
www.pharma.cu.edu.eg dir-mau.fopcu@pharma.cu.edu.eg

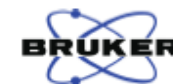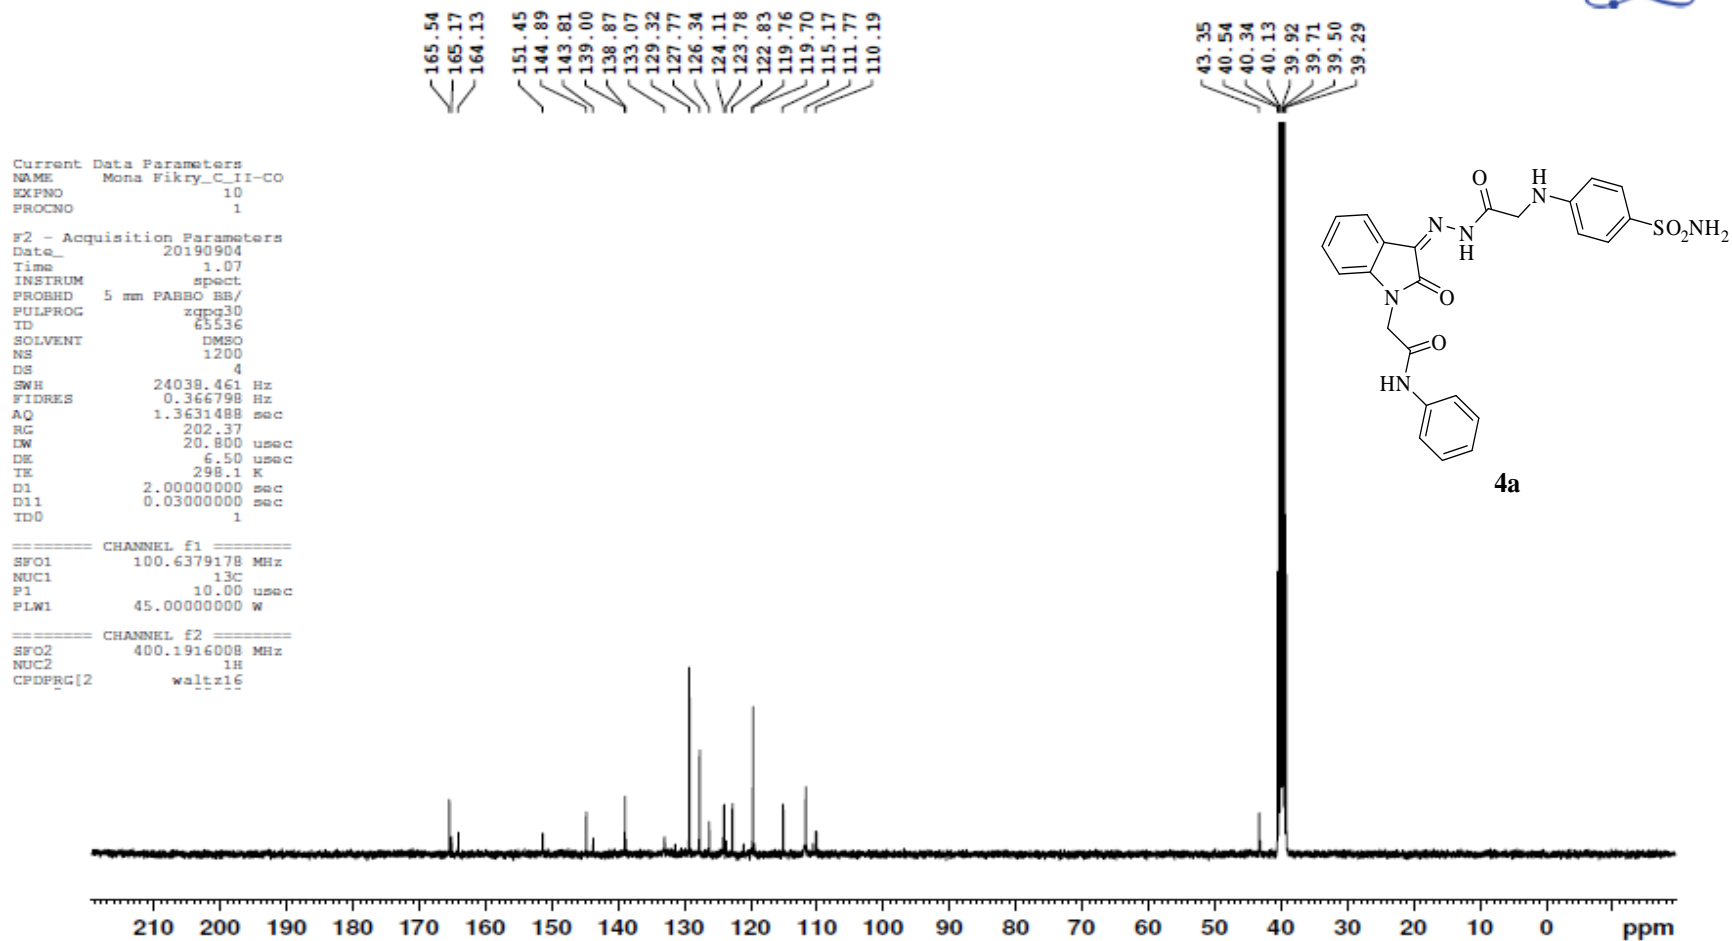

Figure S36. <sup>13</sup>C NMR of compound 4a.

Mona Fikry\_H\_Cl-EBA

Microanalytical Unit - FOPCU - NMR laboratory  
www.pharma.cu.edu.eg dir-mau.fopcu@pharma.cu.edu.eg

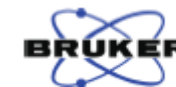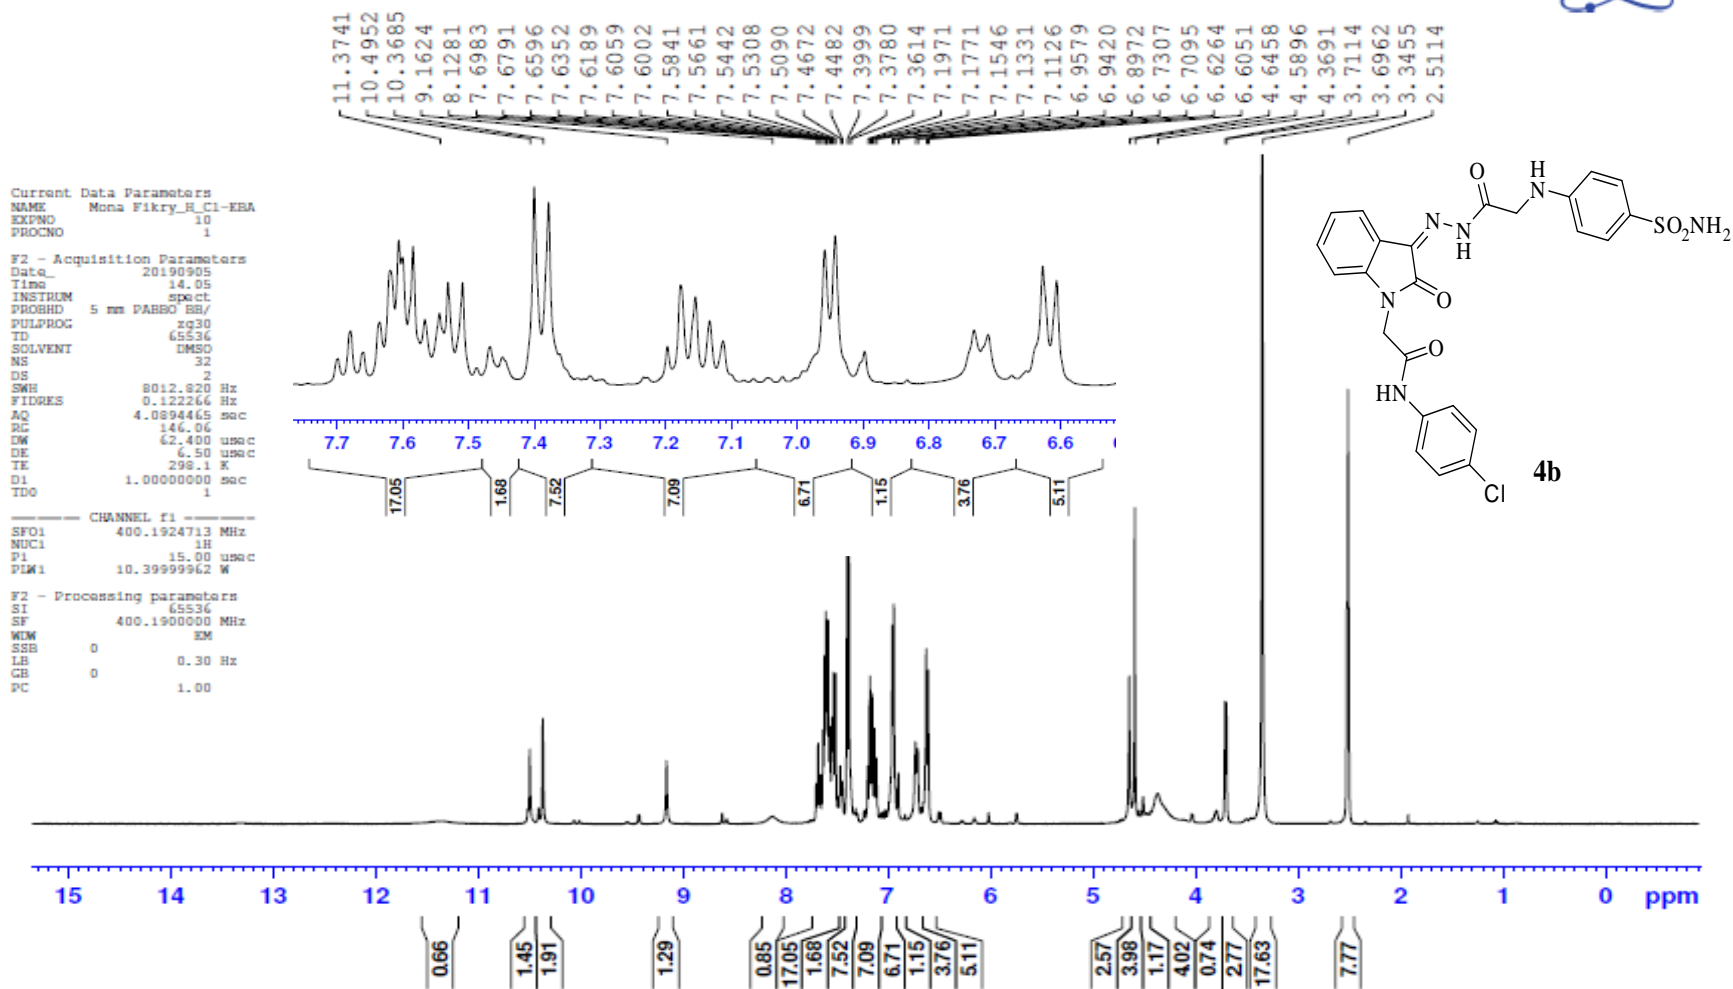

Figure S37. <sup>1</sup>H NMR of compound 4b.

Mona Fikry\_C\_CIEBA

Microanalytical Unit - FOPCU - NMR laboratory  
www.pharma.cu.edu.eg dir-mau.fopcu@pharma.cu.edu.eg

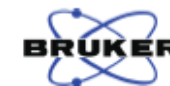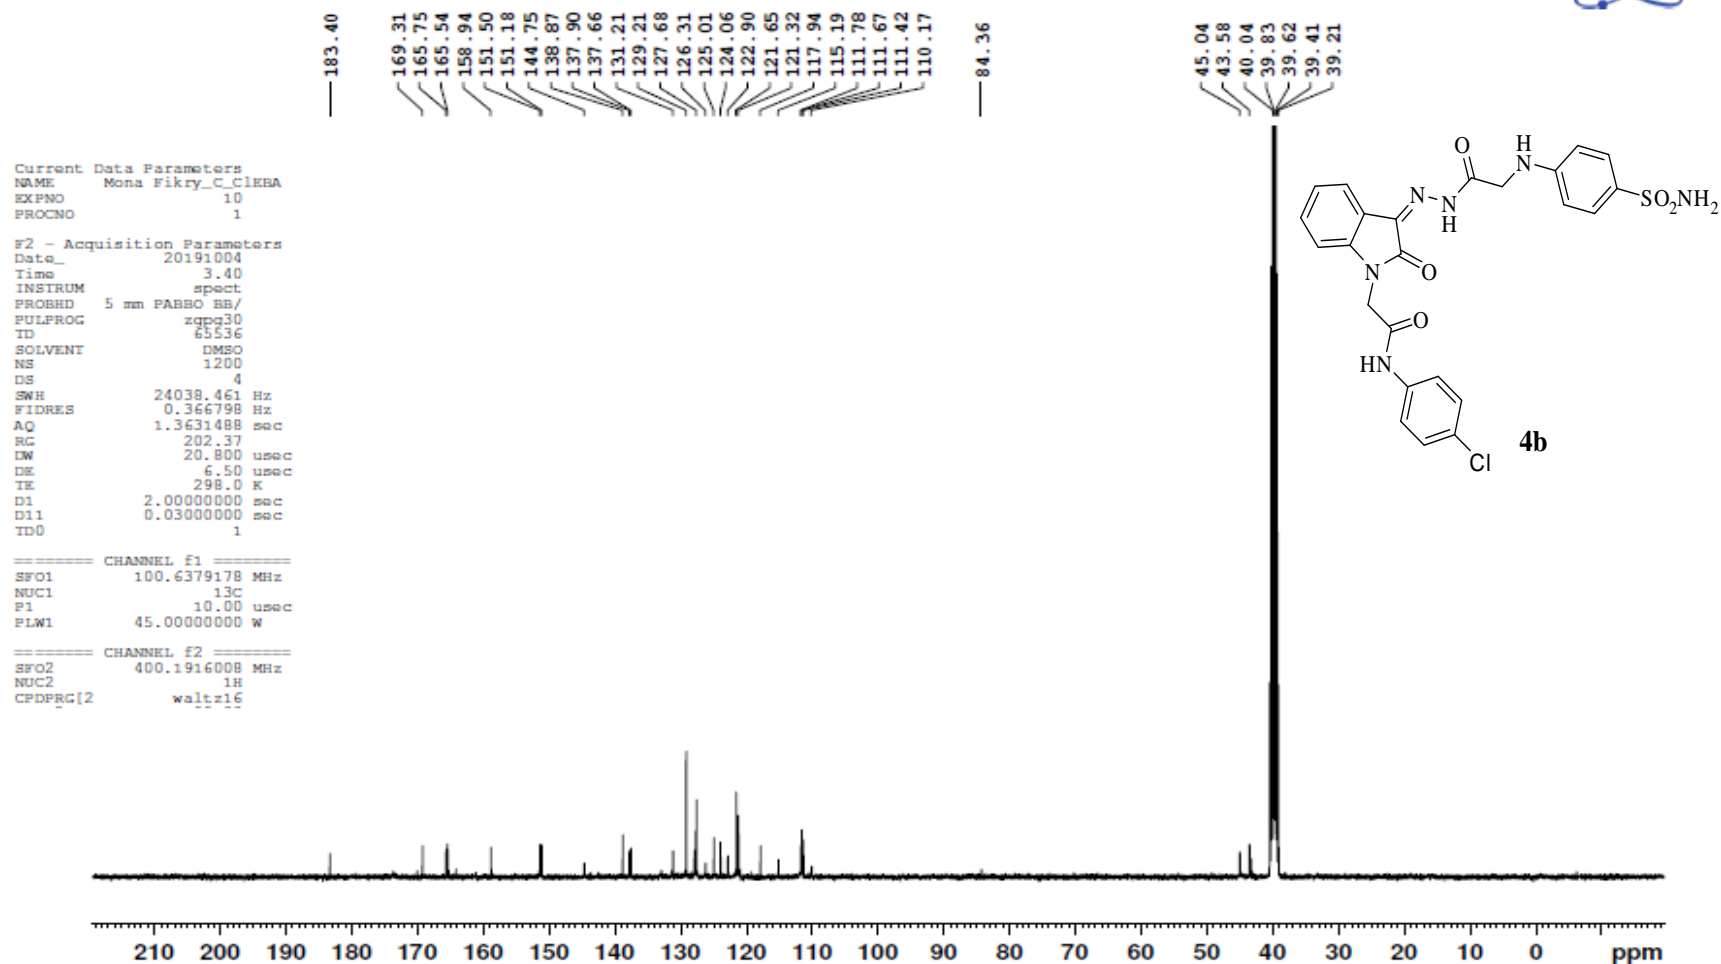

Figure S38. <sup>13</sup>C NMR of compound 4b.

Mona Fikry\_H\_4-BrCO

Microanalytical Unit - FOPCU - NMR laboratory  
www.pharma.cu.edu.eg dir-mau.fopcu@pharma.cu.edu.eg

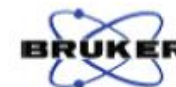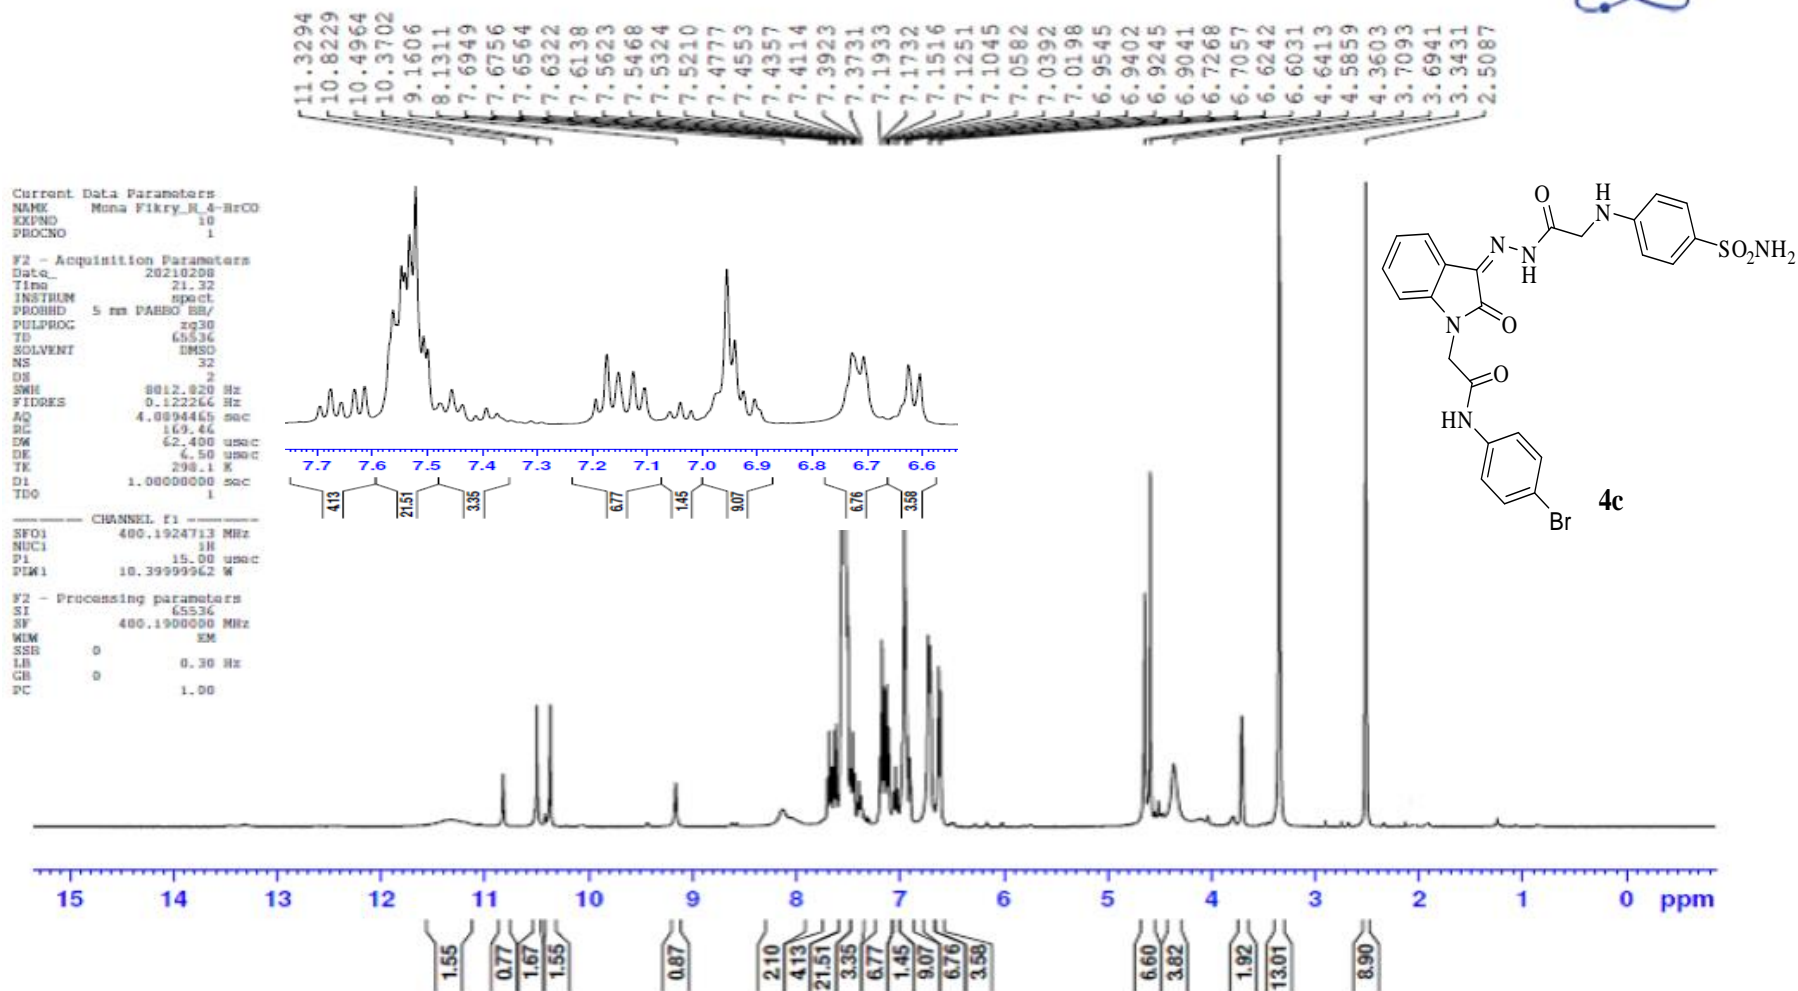

Figure S39. <sup>1</sup>H NMR of compound 4c.

Mona Fikry\_C\_4-Br-Co

Microanalytical Unit - FOPCU - NMR laboratory  
www.pharma.cu.edu.eg dir-mau.fopcu@pharma.cu.edu.eg

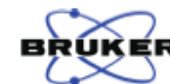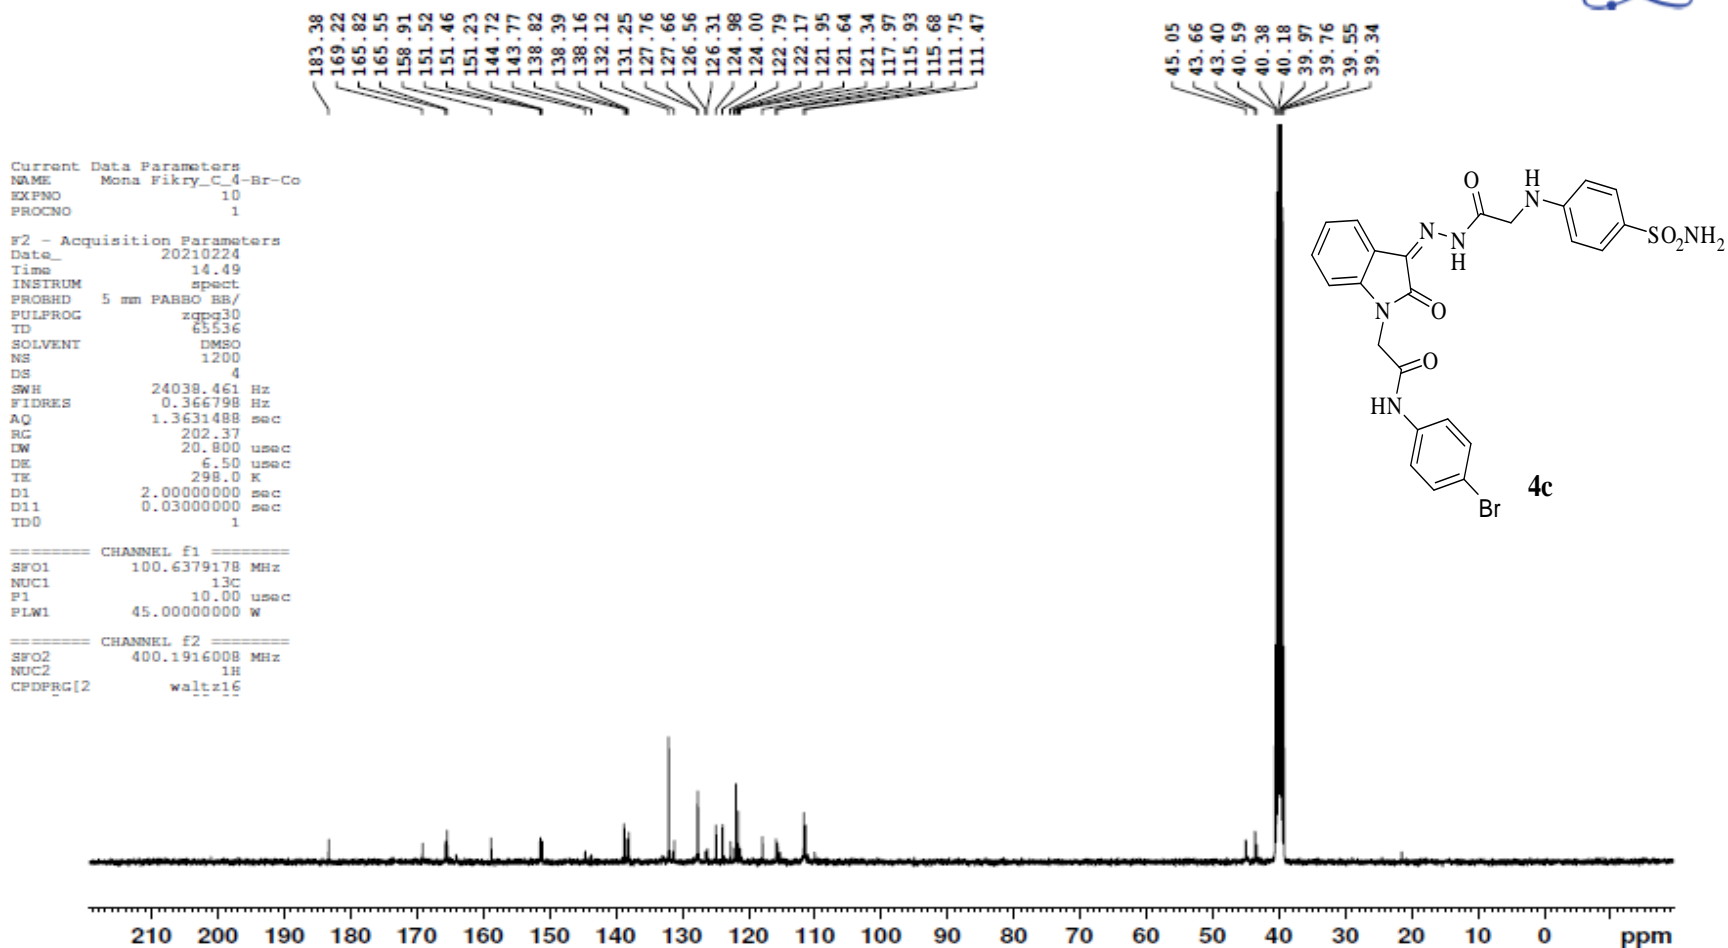

Figure S40. <sup>13</sup>C NMR of compound 4c

Mona Fikry\_H\_CH3EBA

Microanalytical Unit - FOPCU - NMR laboratory  
www.pharma.cu.edu.eg dir-mau.fopcu@pharma.cu.edu.eg

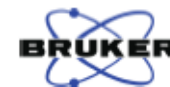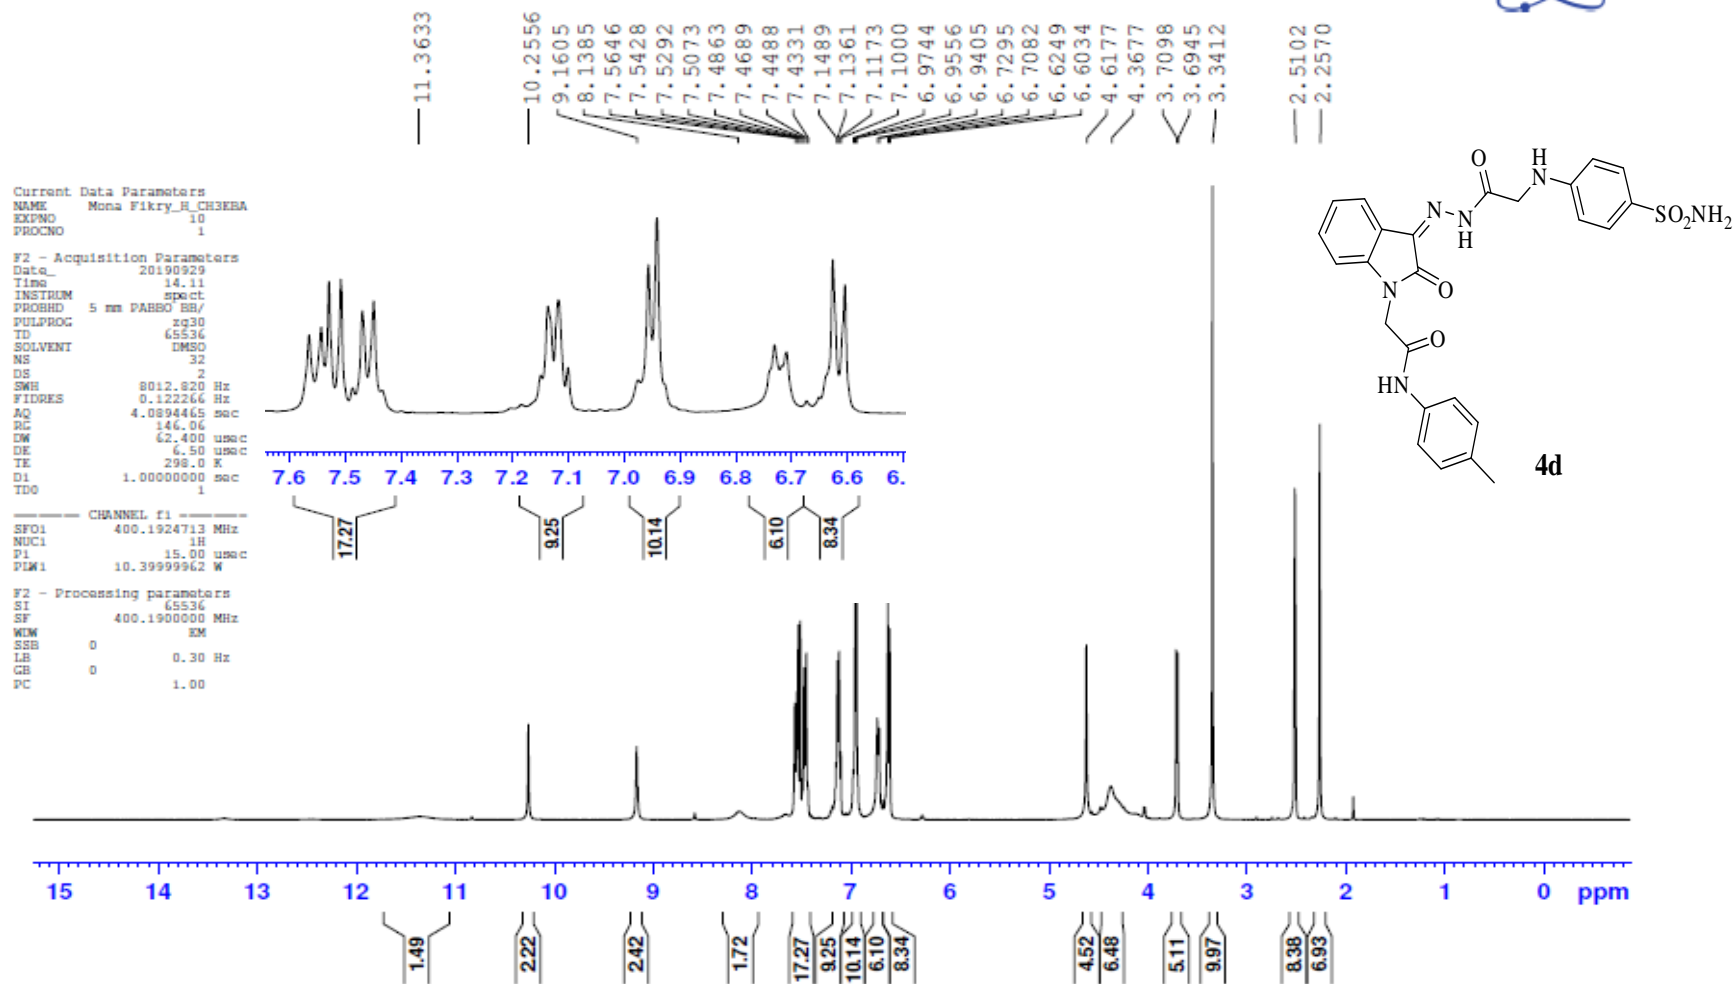

Figure S41. <sup>1</sup>H NMR of compound 4d



Mona Fikry\_C\_CH3EBA

Microanalytical Unit - FOPCU - NMR laboratory  
www.pharma.cu.edu.eg dir-mau.fopcu@pharma.cu.edu.eg

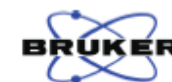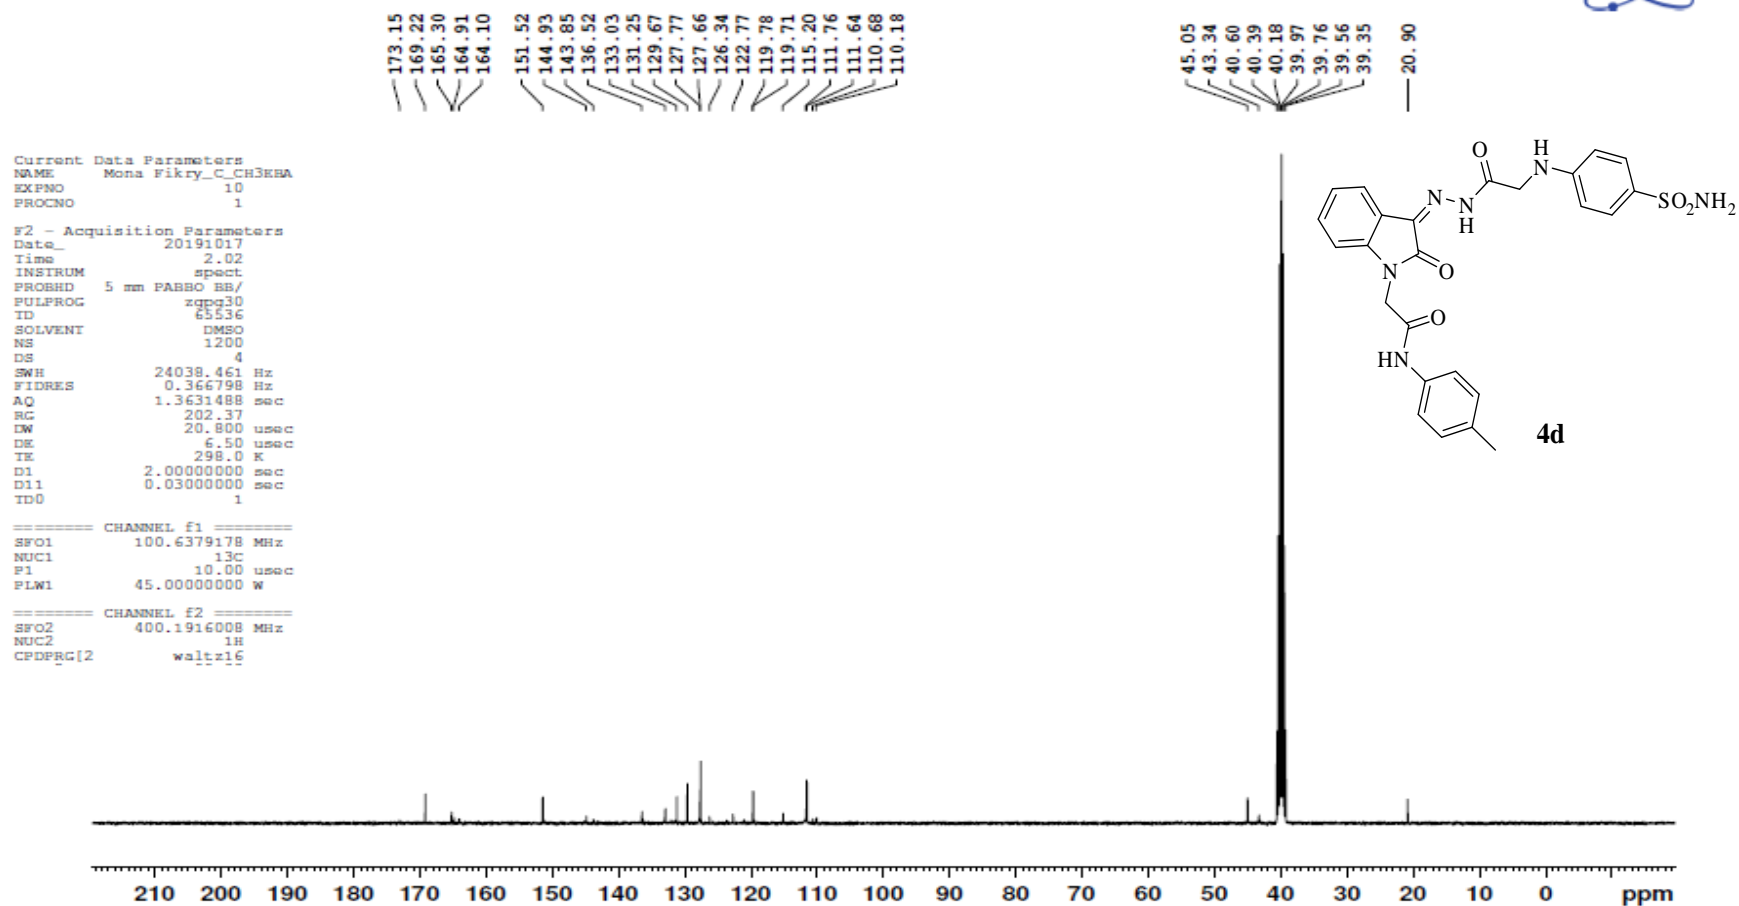

Figure S42. <sup>13</sup>C NMR of compound 4d

Mona Fikry\_H\_OCH3EBA

Microanalytical Unit - FOPCU - NMR laboratory  
www.pharma.cu.edu.eg dir-mau.fopcu@pharma.cu.edu.eg

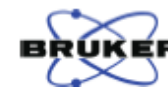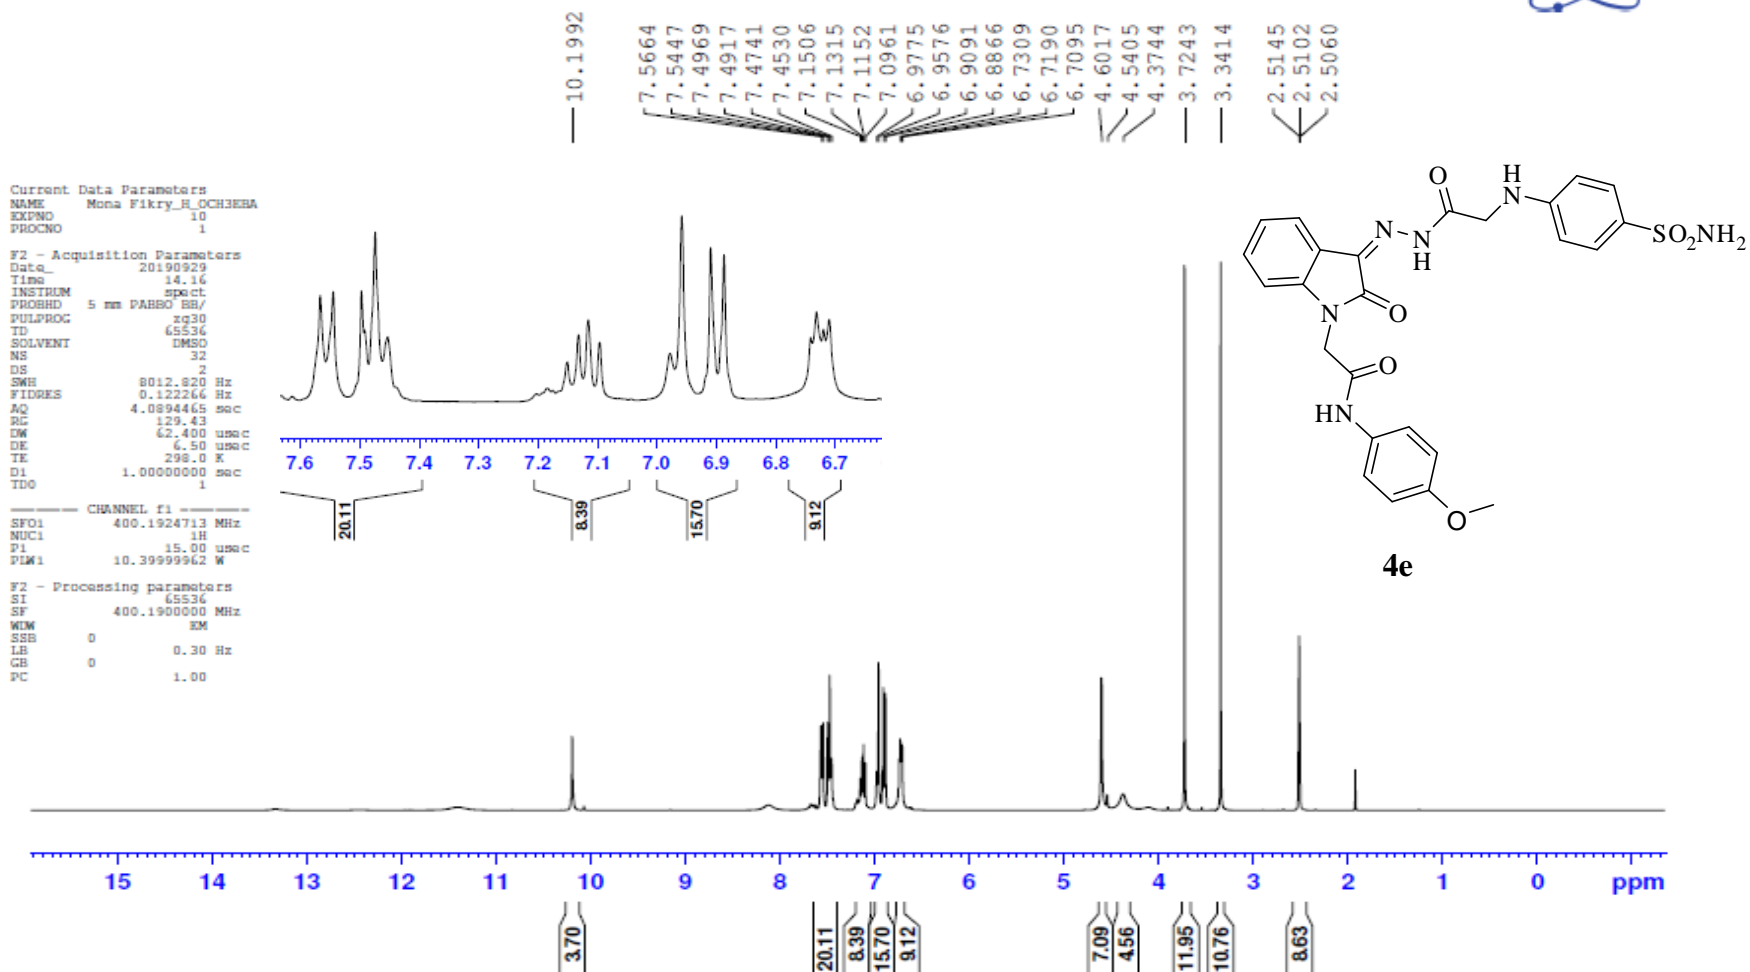

Figure S43. <sup>1</sup>H NMR of compound **4e**.

Mona Fikry\_C\_OCH3EBA

Microanalytical Unit - FOPCU - NMR laboratory  
www.pharma.cu.edu.eg dir-mau.fopcu@pharma.cu.edu.eg

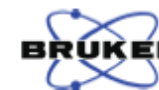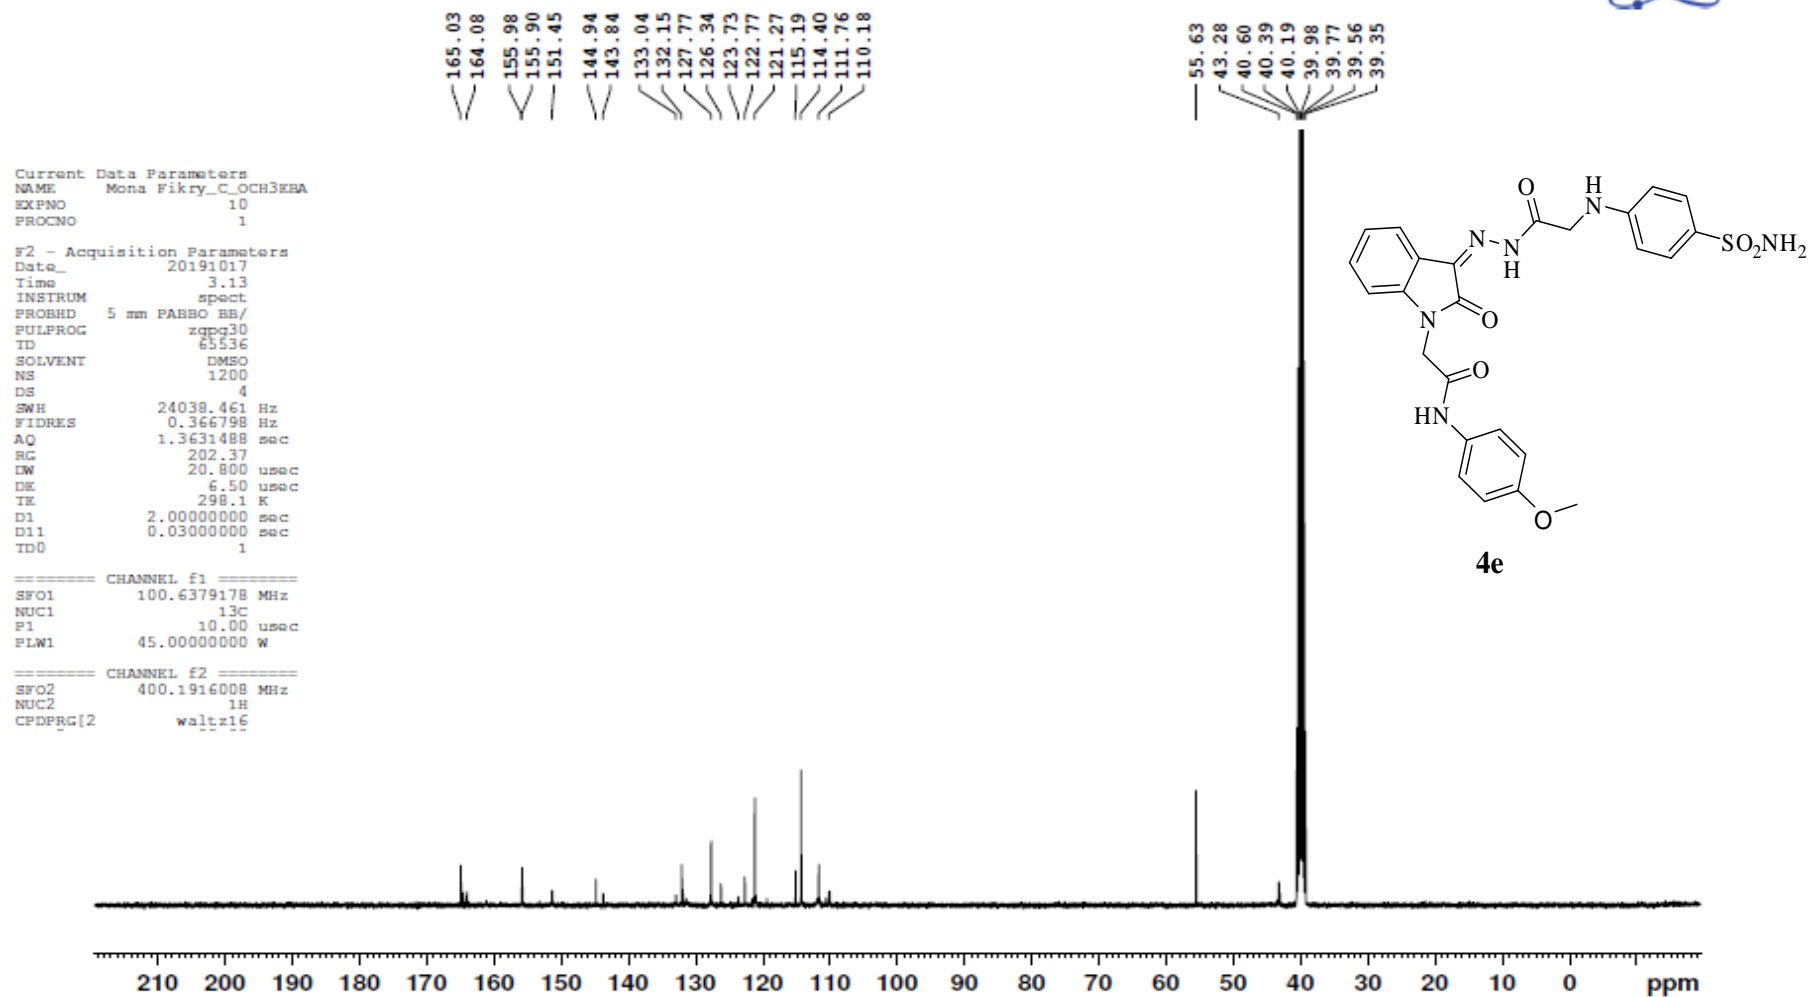

Figure S44. <sup>13</sup>C NMR of compound 4e.

Mona Fikry\_C\_2C1CO2

Microanalytical Unit - FOPCU - NMR laboratory  
www.pharma.cu.edu.eg dir-mau.fopcu@pharma.cu.edu.eg

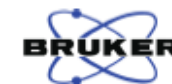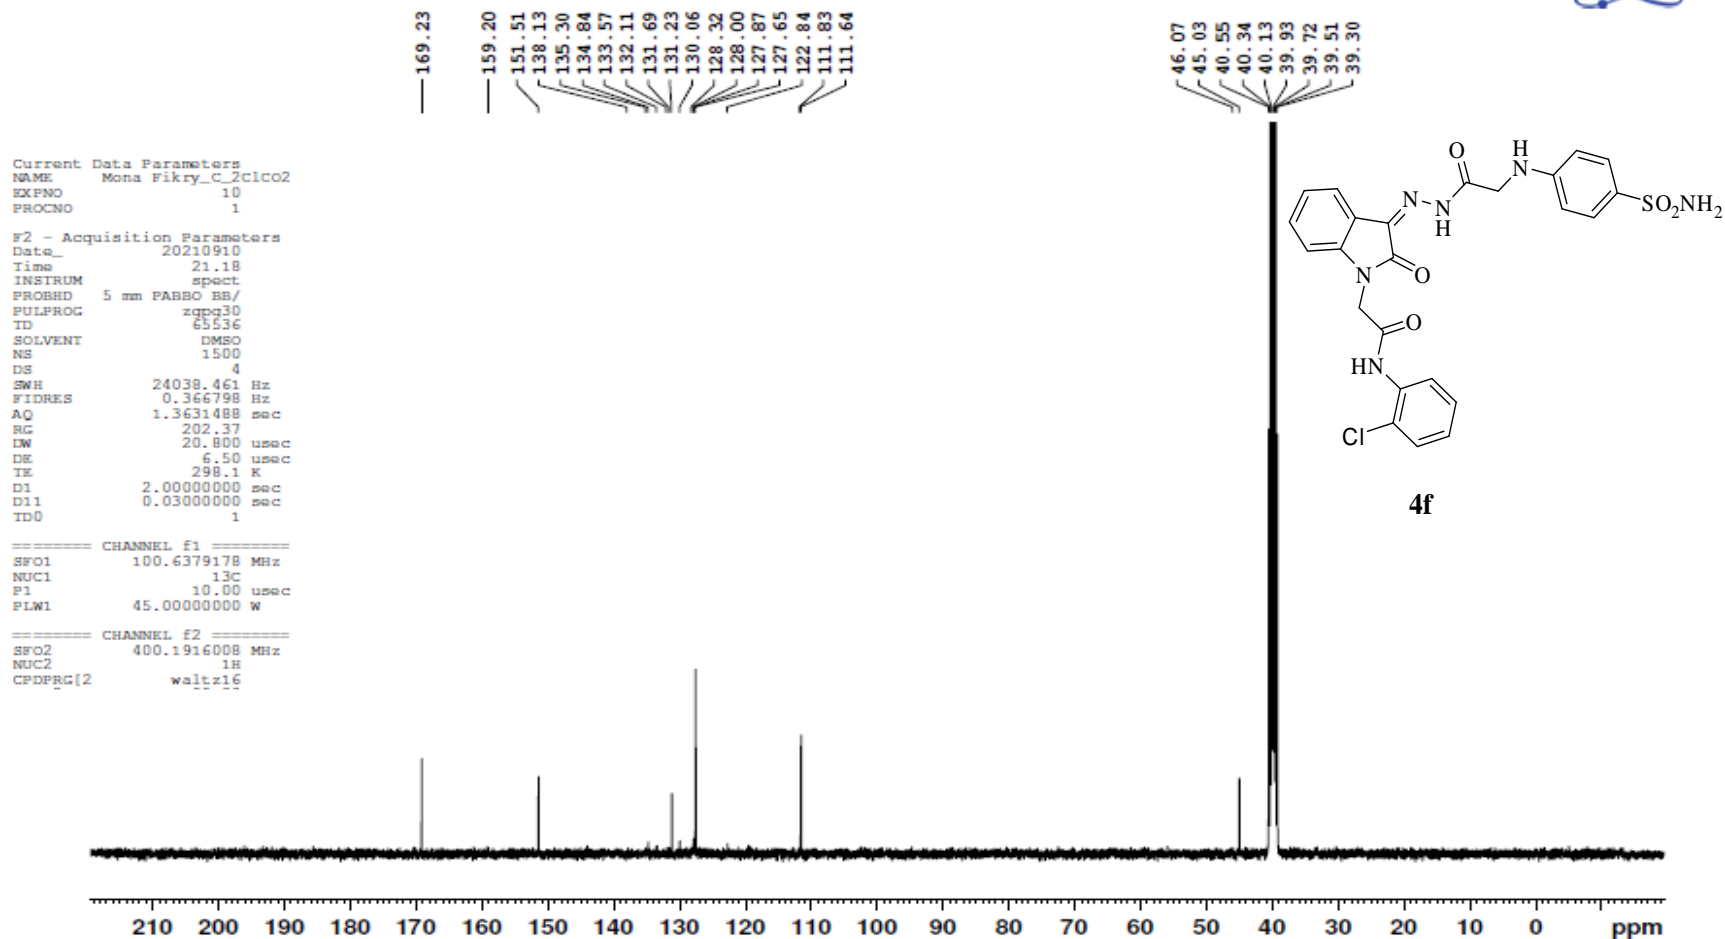

Figure S45. <sup>13</sup>C NMR of compound 4f.

Mona Fikry\_H\_2BrCO

Microanalytical Unit - FOPCU - NMR laboratory  
www.pharma.cu.edu.eg dir-mau.fopcu@pharma.cu.edu.eg

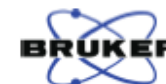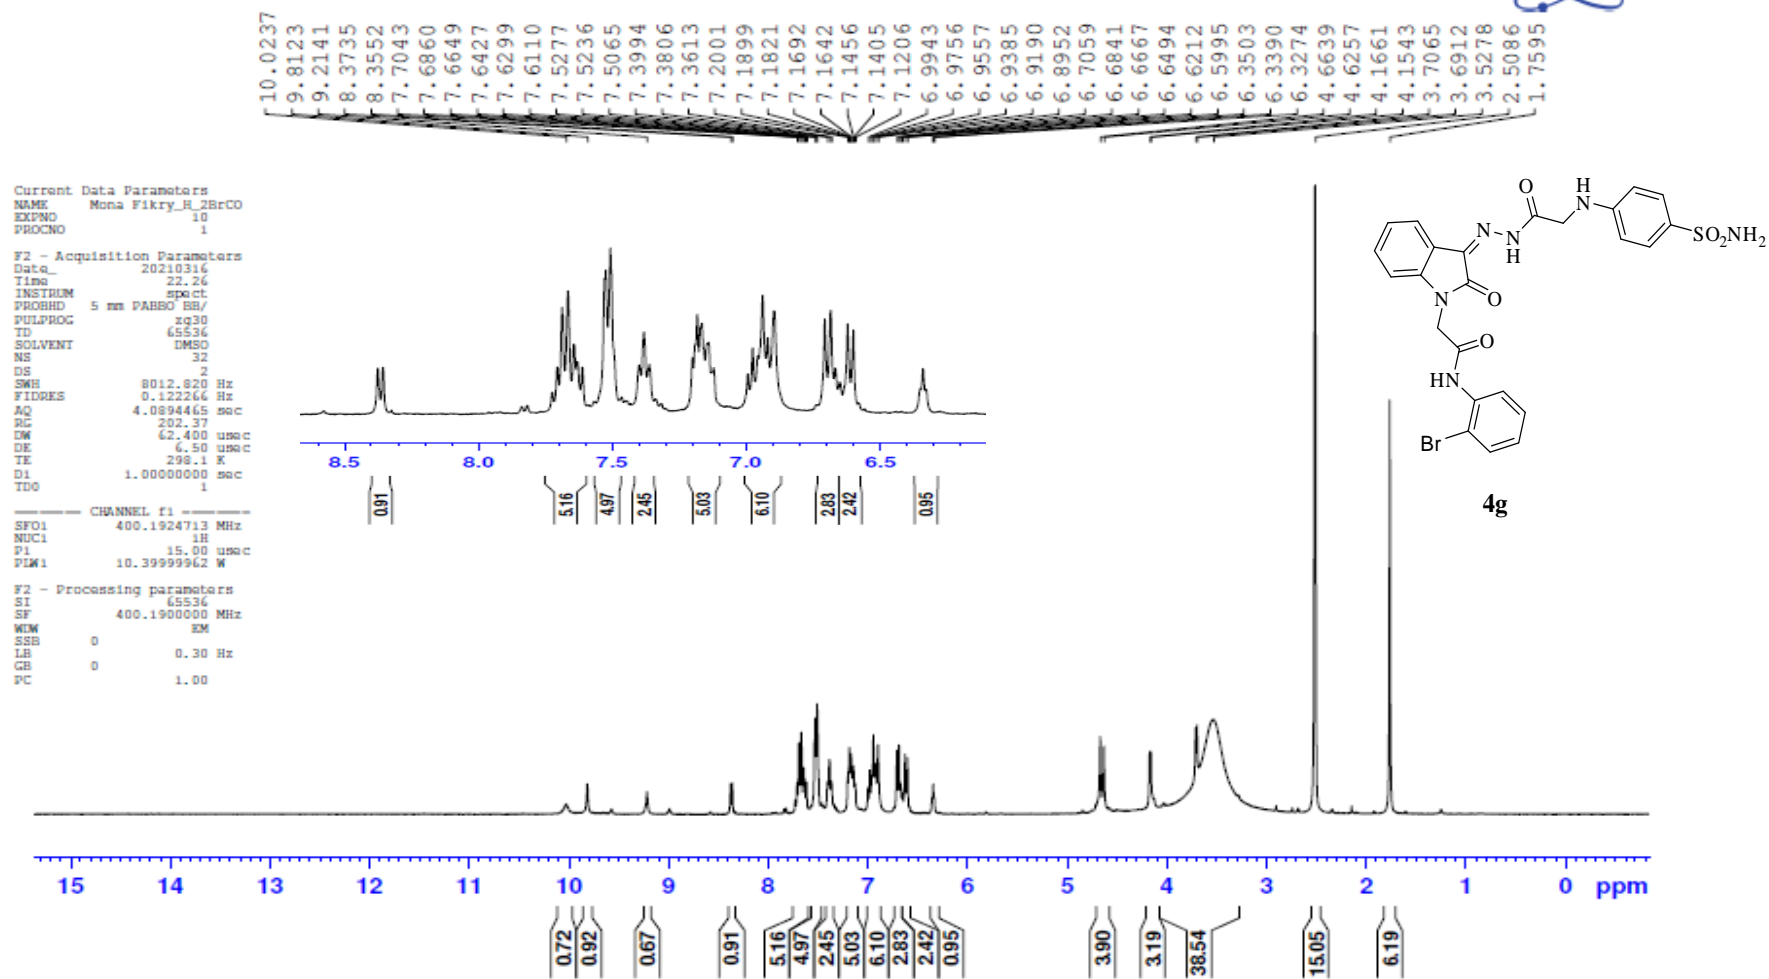

Figure S46. <sup>1</sup>H NMR of compound 4g.

Mona Fikry\_C\_2BrCO

Microanalytical Unit - FOPCU - NMR laboratory  
www.pharma.cu.edu.eg dir-mau.fopcu@pharma.cu.edu.eg

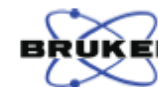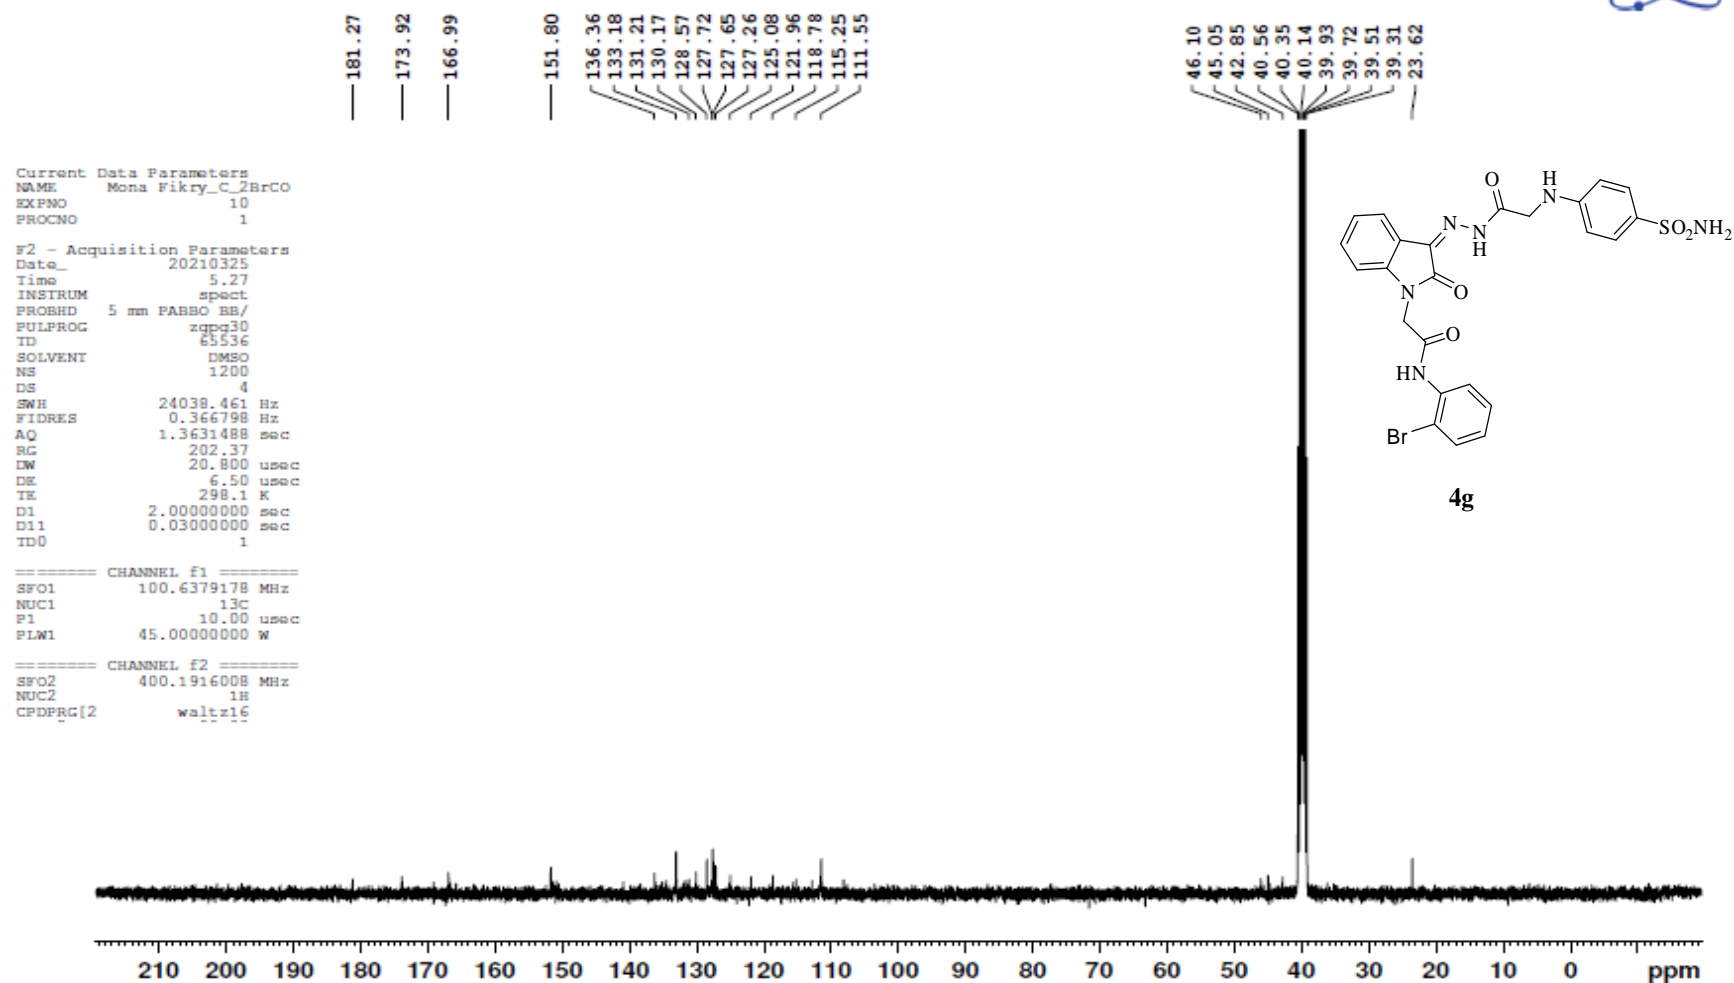

Figure S47. <sup>13</sup>C NMR of compound 4g.
